# Supplementary material for: A role for the centrosome in regulating the rate of neuronal efferocytosis by microglia in vivo
Source: eLife. 2022 Nov 18;11:e82094. doi: 10.7554/eLife.82094 (PMC9674339; doi:10.7554/eLife.82094)
Supplement: Figure 1—source data 1. [file elife-82094-fig1-data1.xlsx]

## Sheet: Sheet1
Experiment	ID	Track Speed Mean (um/sec)		Statistics from Graphpad Prism 9
km198	1000000006	0.0133857		Column statistics
km198	1000000010	0.0143213		Number of values	43
km198	1000000012	0.0058241
km198	1000000014	0.0112589		Minimum	0.004841
km198	1000000016	0.0129722		25% Percentile	0.0074
km198	1000000017	0.00995477		Median	0.0101
km198	1000000018	0.0125631		75% Percentile	0.01364
km198	1000000044	0.0101318		Maximum	0.0239
km198	1000000046	0.0101426
km198	1000000051	0.00608674		Mean	0.01122
km198	1000000054	0.0240245		Std. Deviation	0.005047
km198	1000000069	0.0199652		Std. Error of Mean	0.0007697
km198	1000000070	0.0206251
km198	1000000082	0.00494075		Lower 95% CI of mean	0.009668
km198	1000000083	0.00597682		Upper 95% CI of mean	0.01277
km198	1000000085	0.0126422
km198	1000000093	0.0240608		Sum	0.4825
km198	1000000094	0.0165252
km198	1000000095	0.0155737
km198	1000000096	0.00956012
km198	1000000116	0.00695536
km198	1000000146	0.00741345
km198	1000000171	0.00832825
km266	1000000006	0.00545175
km266	1000000007	0.00860361
km266	1000000015	0.00486122
km266	1000000016	0.00750772
km266	1000000017	0.0171435
km266	1000000018	0.0128495
km266	1000000020	0.00771364
km266	1000000042	0.00635647
km266	1000000047	0.0105525
km266	1000000050	0.0120645
km266	1000000052	0.0169723
km266	1000000055	0.00783997
km266	1000000062	0.00542128
km266	1000000064	0.00940825
km266	1000000085	0.0136358
km266	1000000099	0.00877269
km266	1000002113	0.00950022
km266	1000002645	0.00484108
km266	1000005409	0.0132367
km266	1000006220	0.0179957
