# Supplementary material for: A role for the centrosome in regulating the rate of neuronal efferocytosis by microglia in vivo
Source: eLife. 2022 Nov 18;11:e82094. doi: 10.7554/eLife.82094 (PMC9674339; doi:10.7554/eLife.82094)
Supplement: Figure 1—source data 2. [file elife-82094-fig1-data2.xlsx]

## Sheet: Sheet1
Experiment	Fish	Cell	Time (h)	BM	NBM	%BM	%NBM	Rate/h	Failed attempts	Failures/Hour	Total/hour		Statistics from Graphpad Prism 9
km162	1	1	1.83333	8	1	0.888889	0.111111	4.90909	13	7.09091	12
		2	2	6	4	0.6	0.4	5	8	4	9		Column statistics
		3	2	15	8	0.652174	0.347826	11.5	7	3.5	15			Total	Successful	Failed
		4	2	6	3	0.666667	0.333333	4.5	7	3.5	8		Number of values	28	28	28
		5	2	8	3	0.727273	0.272727	5.5	8	4	9.5
													Minimum	5	2.5	1
													Maximum	15	11.5	7.1
km164	1	1	2	11	3	0.785714	0.214286	7	13	6.5	13.5		Range	10	9	6.1
		2	2	16	4	0.8	0.2	10	6	3	13
		3	1.5	9	5	0.642857	0.357143	9.33333	8	5.33333	14.6667		Mean	9.979	6.064	3.914
		4	2	7	3	0.7	0.3	5	8	4	9		Std. Deviation	2.529	2.157	1.356
		5	2	5	4	0.555556	0.444444	4.5	7	3.5	8		Std. Error of Mean	0.4779	0.4076	0.2562
		6	2	7	3	0.7	0.3	5	9	4.5	9.5
		8	1.91667	13	4	0.764706	0.235294	8.86957	8	4.17391	13.0435		Lower 95% CI of mean	8.998	5.228	3.389
													Upper 95% CI of mean	10.96	6.901	4.44
km164	2	1	2	5	6	0.454545	0.545455	5.5	5	2.5	8
		2	2	4	4	0.5	0.5	4	11	5.5	9.5
		3	1.5	4	2	0.666667	0.333333	4	7	4.66667	8.66667
		4	2	2	3	0.4	0.6	2.5	10	5	7.5			BM	NBM
		5	2	8	6	0.571429	0.428571	7	6	3	10		Number of values	28	28
		6	1.5	6	3	0.666667	0.333333	6	5	3.33333	9.33333
		7	2	8	7	0.533333	0.466667	7.5	7	3.5	11		Minimum	0.4	0.11
													25% Percentile	0.5775	0.245
													Median	0.67	0.33
km174	2	1	2	14	5	0.736842	0.263158	9.5	7	3.5	13		75% Percentile	0.755	0.4225
		2	2	7	3	0.7	0.3	5	2	1	6		Maximum	0.89	0.6
		3	2	3	3	0.5	0.5	3	4	2	5
		4	2	8	2	0.8	0.2	5	8	4	9		Mean	0.6643	0.3357
		5	2	11	3	0.785714	0.214286	7	6	3	10		Std. Deviation	0.1211	0.1211
		6	2	7	4	0.636364	0.363636	5.5	7	3.5	9		Std. Error of Mean	0.02288	0.02288
		7	1.5	6	3	0.666667	0.333333	6	9	6	12
		8	1.5	6	1	0.857143	0.142857	4.66667	3	2	6.66667		Lower 95% CI	0.6173	0.2888
		9	2	8	5	0.615385	0.384615	6.5	8	4	10.5		Upper 95% CI	0.7112	0.3827
Average						0.663378	0.336622	6.06352		3.91422	9.97774
km270	1
