# Supplementary material for: A role for the centrosome in regulating the rate of neuronal efferocytosis by microglia in vivo
Source: eLife. 2022 Nov 18;11:e82094. doi: 10.7554/eLife.82094 (PMC9674339; doi:10.7554/eLife.82094)
Supplement: Figure 2—source data 1. [file elife-82094-fig2-data1.xlsx]

## Sheet: km234_Cell1
Experiment	ID	Track speed mean (um/min)	Category	Filopodia	Long extensions	Statistics from Graphpad Prism 9
km234	1000000159	9.68336	Track	Extension
km234	1000000164	11.6741	Track	Extension		Column statistics
km234	1000000170	8.78196	Track	Extension			Filopodia		Long extensions
km234	1000000176	11.6464	Track	Extension			Extension	Retraction	Extension	Retraction
km234	1000000206	7.778	Track	Extension		Number of values	18	14	12	7
km234	1000000214	6.43032	Track	Extension
km234	1000000233	13.2748	Track	Extension		Minimum	6.43	3.237	2.416	0.8901
km234	1000000265	11.2809	Track	Extension		25% Percentile	8.912	5.943	3.419	1.124
km234	1000000271	7.38232	Track	Extension		Median	11.14	6.806	6.013	3.503
km234	1000000427	10.9992	Track	Extension		75% Percentile	14.07	11.26	8.309	5.109
km234	1000000210	13.4317	Track	Retraction		Maximum	20.91	13.43	10.82	6.769
km234	1000000221	9.19208	Track	Retraction
km234	1000000226	6.91956	Track	Retraction		Mean	11.78	8.109	6.156	3.605
km234	1000000241	5.89444	Track	Retraction		Std. Deviation	3.931	3.012	2.766	2.16
km234	1000000253	6.22652	Track	Retraction		Std. Error of Mean	0.9266	0.8049	0.7984	0.8165
km234	1000000431	6.69268	Track	Retraction
km234	1000000437	5.95952	Track	Retraction		Lower 95% CI	9.822	6.371	4.398	1.607
km234	1000000486	3.23652	Track	Retraction		Upper 95% CI	13.73	9.848	7.913	5.603
km234	1000000088	10.8182	Track		Extension
km234	1000000096	7.96312	Track		Extension
km234	1000000180	9.69844	Track		Extension
km234	1000000277	5.21752	Track		Extension
km234	1000000472	8.4244	Track		Extension
km234	1000000501	6.27772	Track		Extension
km234	1000000563	7.3702	Track		Extension
km234	1000000642	5.74728	Track		Extension
km234	1000000001	2.92051	Track		Retraction
km234	1000000510	3.5026	Track		Retraction
km234	1000000538	4.91856	Track		Retraction
km234	1000000617	5.10888	Track		Retraction
km234	1000000625	6.76868	Track		Retraction
km236	1000000015	20.9068	Track	Extension
km236	1000000018	10.2242	Track	Extension
km236	1000000033	17.4826	Track	Extension
km236	1000000038	8.95572	Track	Extension
km236	1000000066	9.19916	Track	Extension
km236	1000000105	14.388	Track	Extension
km236	1000000146	17.9283	Track	Extension
km236	1000000224	13.9652	Track	Extension
km236	1000000031	11.3159	Track	Retraction
km236	1000000036	12.0332	Track	Retraction
km236	1000000111	6.67284	Track	Retraction
km236	1000000122	11.2352	Track	Retraction
km236	1000000150	9.54516	Track	Retraction
km236	1000000229	5.17688	Track	Retraction
km236	1000000021	13.026	Track		Extension
km236	1000000058	11.0886	Track		Extension
km236	1000000134	9.66292	Track		Extension
km236	1000000244	15.6251	Track		Extension
km236	1000000076	4.49516	Track		Retraction
km236	1000000158	3.56044	Track		Retraction

## Sheet: km236_Fish1_Cell5
ID	Track speed mean (um/min)	Long extensions	Filopodia
1000000015	20.9068		Extension
1000000018	10.2242		Extension
1000000033	17.4826		Extension
1000000038	8.95572		Extension
1000000066	9.19916		Extension
1000000105	14.388		Extension
1000000146	17.9283		Extension
1000000224	13.9652		Extension
1000000031	11.3159		Retraction
1000000036	12.0332		Retraction
1000000111	6.67284		Retraction
1000000122	11.2352		Retraction
1000000150	9.54516		Retraction
1000000229	5.17688		Retraction
1000000021	13.026	Extension
1000000058	11.0886	Extension
1000000134	9.66292	Extension
1000000244	15.6251	Extension
1000000076	4.49516	Retraction
1000000158	3.56044	Retraction
