# Supplementary material for: A role for the centrosome in regulating the rate of neuronal efferocytosis by microglia in vivo
Source: eLife. 2022 Nov 18;11:e82094. doi: 10.7554/eLife.82094 (PMC9674339; doi:10.7554/eLife.82094)
Supplement: Figure 3—figure supplement 2—source data 1. [file elife-82094-fig3-figsupp2-data1.xlsx]

## Sheet: Sheet2
Experiment	Treatment	Cell	#phagocytic events	#events/hour	BM	NBM	%BM	%NBM		Statistics from Graphpad Prism 9
AK002	Nocodazole	1	9	4.5	3	6	0.333333	0.666667		Column B	Nocodazole
	Nocodazole	2	9	4.5	3	6	0.333333	0.666667		vs.	vs,
	Nocodazole	3	8	4	0	8	0	1		Column A	DMSO
	Nocodazole	4	8	4	0	8	0	1
	Nocodazole	5	7	3.5	4	3	0.571429	0.428571		Mann Whitney test
										P value	0.0002
AK001	Nocodazole	1	9	4.5	2	7	0.222222	0.777778		Exact or approximate P value?	Exact
	Nocodazole	2	13	6.5	2	11	0.153846	0.846154		P value summary	***
	Nocodazole	3	14	7	4	10	0.285714	0.714286		Significantly different (P < 0.05)?	Yes
	Nocodazole	4	10	5	4	6	0.4	0.6		One- or two-tailed P value?	Two-tailed
		Average		4.83333	2.44444	7.22222	0.255542	0.744458		Sum of ranks in column A,B	91 , 45
										Mann-Whitney U	0
AK006	DMSO	1	16	5.33333	10	6	0.625	0.375
	DMSO	2	15	5	11	4	0.733333	0.266667		Difference between medians
	DMSO	5	16	5.33333	13	3	0.8125	0.1875		Median of column A	0,7500, n=7
	DMSO	6	12	4	9	3	0.75	0.25		Median of column B	0,2857, n=9
	DMSO	7	11	3.66667	8	3	0.727273	0.272727		Difference: Actual	-0.4643
	DMSO	9	13	4.33333	11	2	0.846154	0.153846		Difference: Hodges-Lehmann	-0.4792
	DMSO	10	12	4	9	3	0.75	0.25
		Average		4.52381	10.1429	3.42857	0.74918	0.25082		Descriptive statistics
											DMSO	Nocodazole
										Number of values	7	9
										Minimum	0.625	0
										25% Percentile	0.7273	0.07692
										Median	0.75	0.2857
										75% Percentile	0.8125	0.3667
										Maximum	0.8462	0.5714
										Mean	0.7492	0.2555
										Std. Deviation	0.0702	0.1856
										Std. Error of Mean	0.02653	0.06188
										Lower 95% CI	0.6843	0.1128
										Upper 95% CI	0.8141	0.3982
