# Supplementary material for: A role for the centrosome in regulating the rate of neuronal efferocytosis by microglia in vivo
Source: eLife. 2022 Nov 18;11:e82094. doi: 10.7554/eLife.82094 (PMC9674339; doi:10.7554/eLife.82094)
Supplement: Figure 3—source data 1. [file elife-82094-fig3-data1.xlsx]

## Sheet: Sheet1
		Pre-PST-1											PST-1-ON												Statistics from Graphpad Prism 9
Experiment	TrackID	51	52	53	54	55	56	57	58	59	60	Experiment	Track ID	0	1	2	3	4	5	6	7	8	9		Column B	5min ON
km188-Exp1	1000000001	0.599151	0.569499	0.542144	0.52294	0.547213	0.54213	0.580891	0.579742	0.575375	0.557122	km188-Exp1	1000000005	0.698694	0.68077	0.68783	0.698507	0.725099	0.768923	0.842095	0.875203	0.783302	0.780936		vs.	vs,
	1000000003	0.596198	0.577502	0.577747	0.594928	0.585271	0.561141	0.571937	0.593621	0.583545	0.582489		1000000012	0.730759	0.689337	0.777702	0.768985	0.755319	0.740659	0.702685	0.703378	0.712754	0.653013		Column A	0min ON
	1000000005	0.663784	0.687854	0.70844	0.699092	0.69335	0.692123	0.714227	0.707243	0.7057	0.66149		1000000013	0.640742	0.636986	0.616316	0.676071	0.62535	0.696536	0.733468	0.685699	0.67292	0.62273
	1000000016	0.667567	0.6403	0.654239	0.69815	0.682561	0.594704	0.643863	0.588469	0.609463	0.635693		1000000016	0.432256	0.420435	0.417807	0.442227	0.442397	0.452997	0.450468	0.445923	0.46876	0.442296		Mann Whitney test
	1000000017	0.734734	0.717703	0.718279	0.677443	0.70031	0.696021	0.681611	0.678018	0.650095	0.668239		1000000020	0.735273	0.65277	0.672192	0.736746	0.783149	0.72816	0.72293	0.729069	0.682498	0.621733		P value	0.0005
	1000000018	0.508643	0.500618	0.519464	0.459844	0.474288	0.508041	0.545883	0.548812	0.518284	0.506336		1000000021	0.533161	0.504202	0.523669	0.51425	0.521193	0.511323	0.486979	0.494061	0.471029	0.468453		Exact or approximate P value?	Exact
	1000000019	0.456088	0.458397	0.433063	0.424178	0.436481	0.436207	0.437427	0.441222	0.439904	0.430891		1000000025	0.668231	0.618589	0.655316	0.699128	0.812158	0.859614	0.791458	0.788651	0.795847	0.780414		P value summary	***
	1000000021	0.486428	0.499388	0.488459	0.485999	0.453283	0.462988	0.449445	0.451053	0.486176	0.497853		1000000030	0.484185	0.494058	0.493786	0.48764	0.51452	0.52294	0.514337	0.550405	0.574812	0.577175		Significantly different (P < 0.05)?	Yes
	1000000022	0.693894	0.73108	0.694093	0.738273	0.71427	0.741256	0.66911	0.615755	0.684978	0.656342		1000000031	0.686441	0.690773	0.72432	0.722417	0.699119	0.686269	0.691119	0.699947	0.63796	0.708221		One- or two-tailed P value?	Two-tailed
	1000000025	0.64463	0.729853	0.59322	0.686107	0.598116	0.6265	0.606311	0.580513	0.627561	0.615822		1000000033	0.413172	0.427617	0.403897	0.41376	0.449344	0.477294	0.450276	0.446951	0.448154	0.432781		Sum of ranks in column A,B	1859 , 2797
	1000000028	0.722116	0.683599	0.730619	0.714743	0.66967	0.668557	0.686172	0.699417	0.684774	0.691103		1000000036	0.581488	0.583455	0.576763	0.61667	0.689867	0.689149	0.640257	0.685331	0.733664	0.713836		Mann-Whitney U	683
	1000000037	0.508458	0.517805	0.514422	0.502399	0.49325	0.502729	0.52577	0.528078	0.5371	0.551708		1000000046	0.587699	0.573371	0.594848	0.631798	0.660636	0.714908	0.72722	0.780301	0.79989	0.771793
	1000000077	0.441205	0.445525	0.452547	0.460387	0.465488	0.466897	0.455438	0.460941	0.460562	0.476679		1000000054	0.537498	0.523434	0.52724	0.54534	0.611079	0.641465	0.65277	0.680443	0.641011	0.59879		Difference between medians
	1000000080	0.46059	0.459325	0.440587	0.418419	0.401371	0.433048	0.431989	0.442059	0.415809	0.41635		1000000147	0.696463	0.712544	0.808146	0.788009	0.822859	0.843194	0.827578	0.813852	0.808578	0.831495		Median of column A	0,5308, n=48
km190-Fish1	1000003486	0.55143	0.517914	0.525809	0.527419	0.498876	0.487004	0.475061	0.487773	0.488585	0.502687		1000000211	0.601753	0.638203	0.653603	0.695015	0.697715	0.719586	0.749379	0.743405	0.713892	0.713645		Median of column B	0,6007, n=48
	1000003487	0.395866	0.396179	0.406865	0.38398	0.407886	0.40222	0.404199	0.403231	0.422778	0.432924	km190-Fish1	1000000760	0.482013	0.51965	0.48135	0.522531	0.576818	0.555593	0.563678	0.602461	0.61945	0.599408		Difference: Actual	0.06996
	1000003492	0.468509	0.456261	0.427759	0.434842	0.447184	0.472773	0.526174	0.477329	0.480446	0.484565		1000000762	0.425091	0.426694	0.450558	0.466915	0.469425	0.48328	0.4506	0.464405	0.460789	0.464103		Difference: Hodges-Lehmann	0.07271
	1000003493	0.491834	0.47642	0.480983	0.534139	0.50474	0.52518	0.549654	0.538746	0.529711	0.466268		1000000766	0.615799	0.629923	0.6506	0.633444	0.69882	0.735869	0.681436	0.754865	0.694598	0.676404
	1000003494	0.553633	0.538684	0.54357	0.536877	0.54261	0.5105	0.51368	0.533542	0.509768	0.555344		1000000768	0.564877	0.514464	0.588862	0.507913	0.56924	0.589077	0.612418	0.63815	0.617032	0.605293		Descriptive Statistics
	1000003495	0.62814	0.634212	0.631906	0.656068	0.664952	0.67163	0.657061	0.667485	0.646117	0.63989		1000000769	0.517871	0.524441	0.547112	0.568535	0.595325	0.606309	0.589299	0.585229	0.578917	0.558848			0min ON	5min ON
	1000003497	0.483484	0.472401	0.467055	0.479221	0.463474	0.480424	0.554178	0.535326	0.614581	0.545442		1000000770	0.495184	0.507646	0.545648	0.601229	0.575021	0.642901	0.542973	0.500904	0.55773	0.596678		Number of values	48	48
	1000003498	0.51307	0.594957	0.593521	0.615312	0.552375	0.561908	0.598478	0.595756	0.56379	0.556073		1000000771	0.528413	0.498288	0.530253	0.592271	0.654489	0.661068	0.727376	0.741339	0.75635	0.739633
	1000003499	0.567314	0.597403	0.59121	0.607366	0.576533	0.603772	0.609938	0.60738	0.612144	0.548393		1000000772	0.632915	0.616788	0.612785	0.681871	0.711947	0.713345	0.653787	0.649544	0.613038	0.617616		Minimum	0.3733	0.4369
	1000003502	0.526546	0.540401	0.591656	0.582144	0.582201	0.593013	0.543558	0.555311	0.539979	0.539701		1000000775	0.492639	0.48422	0.501515	0.524157	0.540038	0.535726	0.520966	0.501094	0.517056	0.5288		25% Percentile	0.4786	0.5383
	1000003505	0.563919	0.514308	0.521934	0.534056	0.576398	0.57454	0.570205	0.601291	0.591819	0.578024		1000000776	0.570937	0.575292	0.607061	0.516586	0.519047	0.566844	0.529923	0.525286	0.556638	0.64103		Median	0.5308	0.6007
	1000003713	0.544324	0.542146	0.536753	0.552936	0.531626	0.540155	0.522977	0.515434	0.515432	0.494916		1000000777	0.558678	0.589672	0.606829	0.607753	0.653191	0.595187	0.630451	0.589792	0.618718	0.60478		75% Percentile	0.6046	0.7091
	1000003729	0.592236	0.599284	0.59328	0.598695	0.612926	0.61461	0.598755	0.599128	0.598384	0.60076		1000000779	0.598095	0.617724	0.628185	0.620652	0.641914	0.689362	0.657634	0.668231	0.736926	0.808091		Maximum	0.7353	0.8749
	1000003730	0.480872	0.466133	0.456958	0.471204	0.490884	0.482371	0.49538	0.482443	0.485865	0.483843		1000000781	0.520596	0.509519	0.512181	0.529385	0.532791	0.559963	0.591816	0.584939	0.623169	0.641715
km190-Fish2	1000000902	0.479049	0.458531	0.478642	0.504479	0.498333	0.525211	0.502483	0.494434	0.517535	0.512062		1000000783	0.60449	0.585238	0.585994	0.633825	0.568151	0.549395	0.56874	0.562446	0.601188	0.625242		Mean	0.5455	0.6224
	1000000905	0.538984	0.500073	0.495348	0.501001	0.526764	0.524367	0.565185	0.520142	0.463343	0.477153	km190-Fish2	1000000664	0.483663	0.479335	0.500745	0.49137	0.580554	0.581884	0.585716	0.550504	0.528208	0.529689		Std. Deviation	0.09095	0.1072
	1000000907	0.412928	0.420648	0.435749	0.436433	0.411549	0.400096	0.389369	0.373693	0.372966	0.376908		1000000668	0.410054	0.418072	0.473275	0.487911	0.497102	0.496188	0.536616	0.563311	0.559879	0.568973		Std. Error of Mean	0.01313	0.01548
	1000000908	0.649548	0.645617	0.638394	0.638793	0.635303	0.637746	0.64128	0.636812	0.637207	0.642459		1000000669	0.373325	0.368597	0.389168	0.423449	0.446043	0.436878	0.42583	0.444738	0.459234	0.483309
	1000000909	0.41031	0.403344	0.381281	0.393844	0.395187	0.409016	0.406393	0.406412	0.412568	0.447684		1000000670	0.654691	0.647078	0.636632	0.627159	0.631366	0.606886	0.610053	0.59402	0.591819	0.629552		Lower 95% CI	0.5191	0.5912
	1000000910	0.429138	0.422982	0.399754	0.390361	0.406695	0.411272	0.40706	0.407243	0.394372	0.379736		1000000671	0.453383	0.465077	0.498488	0.533912	0.550364	0.552132	0.545903	0.523335	0.497305	0.462409		Upper 95% CI	0.5719	0.6535
	1000000912	0.466524	0.465496	0.486917	0.485176	0.45706	0.433856	0.398428	0.391304	0.417935	0.443598		1000000672	0.450422	0.449938	0.507532	0.549228	0.558843	0.556003	0.530167	0.50129	0.467496	0.479063
	1000000914	0.453499	0.44073	0.433801	0.431274	0.433807	0.460723	0.453985	0.419858	0.429755	0.438978		1000000674	0.478372	0.494125	0.528148	0.510174	0.519805	0.52527	0.513597	0.620618	0.666109	0.651233
	1000000915	0.457858	0.427677	0.45591	0.450395	0.490083	0.481318	0.511948	0.472638	0.478702	0.487043		1000000678	0.545251	0.561861	0.641913	0.680386	0.683079	0.653226	0.714022	0.667539	0.684745	0.680888
	1000000916	0.41803	0.420818	0.42104	0.419072	0.419154	0.426718	0.412185	0.421972	0.42389	0.409855		1000000679	0.479311	0.505072	0.525502	0.528591	0.524515	0.521019	0.529569	0.537476	0.546064	0.550587
	1000000917	0.449082	0.450375	0.471547	0.464195	0.449195	0.463025	0.467466	0.449513	0.448303	0.447449		1000000680	0.442774	0.46538	0.478536	0.489773	0.513468	0.545909	0.587992	0.556632	0.602001	0.588588
	1000000919	0.627255	0.614778	0.60953	0.625935	0.572686	0.498866	0.600955	0.635124	0.590351	0.546173		1000000681	0.523986	0.547667	0.664982	0.604124	0.646105	0.680319	0.710944	0.721631	0.724803	0.647743
	1000000920	0.477695	0.455625	0.448455	0.489316	0.501524	0.490602	0.485669	0.483781	0.486215	0.483435		1000000682	0.474382	0.475235	0.467881	0.485635	0.501044	0.524793	0.500366	0.500687	0.481071	0.458343
km191-Fish3	1000000041	0.477513	0.453894	0.468955	0.450535	0.474826	0.472885	0.497433	0.512382	0.496203	0.511816	km191-Fish3	1000000017	0.665631	0.664779	0.7125	0.751816	0.740387	0.721578	0.759737	0.758058	0.74199	0.739959
	1000000045	0.70413	0.72989	0.721385	0.760464	0.741498	0.689726	0.730685	0.723198	0.61026	0.596007		1000000052	0.604642	0.64382	0.840013	0.864005	0.874426	0.874851	0.842509	0.784602	0.741325	0.771538
	1000000059	0.625536	0.591349	0.567489	0.514418	0.561337	0.565729	0.5477	0.581017	0.576764	0.568469		1000000054	0.508364	0.526688	0.629189	0.67207	0.650861	0.644896	0.673302	0.62856	0.574183	0.591011
	1000000066	0.453187	0.451791	0.459604	0.469319	0.470758	0.420195	0.401691	0.429559	0.448188	0.462638		1000000059	0.474535	0.444924	0.484506	0.582132	0.572801	0.521676	0.550003	0.618875	0.69614	0.680354
	1000000348	0.617781	0.587922	0.60504	0.708876	0.684492	0.586203	0.626733	0.644917	0.608924	0.631917		1000000066	0.485887	0.483722	0.46076	0.489407	0.538	0.572064	0.604682	0.605878	0.64428	0.601187
	1000000931	0.51226	0.558891	0.545234	0.484068	0.532364	0.537665	0.471071	0.475157	0.48527	0.479721		1000001371	0.576701	0.610134	0.737156	0.784886	0.796933	0.76184	0.701007	0.768476	0.795463	0.727952
													1000001373	0.462154	0.457683	0.471711	0.493447	0.529005	0.560135	0.546429	0.580637	0.606314	0.629943
