# Supplementary material for: A role for the centrosome in regulating the rate of neuronal efferocytosis by microglia in vivo
Source: eLife. 2022 Nov 18;11:e82094. doi: 10.7554/eLife.82094 (PMC9674339; doi:10.7554/eLife.82094)
Supplement: Figure 3—source data 2. [file elife-82094-fig3-data2.xlsx]

## Sheet: Sheet1
	Pre-PST-1					PST1-ON					Statistics from Graphpad Prism 9
Experiment	Track Speed Mean	Unit	Category	ID	Experiment	Track Speed Mean	Unit	Category	ID		Column B	PST-1-ON
km188-Exp1	0.0103718	µm/s	Track	1000000000	km188-Exp1	0.0236777	µm/s	Track	1000000035		vs.	vs,
	0.0169013	µm/s	Track	1000000000		0.0184206	µm/s	Track	1000000040		Column A	Pre-PST-1
	0.0105852	µm/s	Track	1000000000		0.0138607	µm/s	Track	1000000041
	0.00786314	µm/s	Track	1000000000		0.0249866	µm/s	Track	1000000043		Mann Whitney test
	0.00848229	µm/s	Track	1000000000		0.0139649	µm/s	Track	1000000066		P value	<0,0001
	0.00674926	µm/s	Track	1000000000		0.0179359	µm/s	Track	1000000069		Exact or approximate P value?	Exact
	0.00932173	µm/s	Track	1000000000		0.0173157	µm/s	Track	1000000071		P value summary	****
	0.0143286	µm/s	Track	1000000000		0.0266513	µm/s	Track	1000000074		Significantly different (P < 0.05)?	Yes
	0.00647369	µm/s	Track	1000000000		0.0291151	µm/s	Track	1000000075		One- or two-tailed P value?	Two-tailed
	0.0172227	µm/s	Track	1000000000		0.0267748	µm/s	Track	1000000080		Sum of ranks in column A,B	1604 , 3649
	0.00810422	µm/s	Track	1000000000		0.0168816	µm/s	Track	1000000081		Mann-Whitney U	278
	0.0060965	µm/s	Track	1000000000		0.0234116	µm/s	Track	1000000082
	0.0177076	µm/s	Track	1000000000		0.0328181	µm/s	Track	1000000084		Difference between medians
	0.00620862	µm/s	Track	1000000000		0.019989	µm/s	Track	1000000142		Median of column A	0,01059, n=51
	0.0130084	µm/s	Track	1000000000		0.0297207	µm/s	Track	1000000699		Median of column B	0,02054, n=51
	0.00929795	µm/s	Track	1000000000		0.0168371	µm/s	Track	1000001601		Difference: Actual	0.009958
km190-Fish1	0.00802617	µm/s	Track	1000000073		0.018721	µm/s	Track	1000002603		Difference: Hodges-Lehmann	0.009452
	0.00775641	µm/s	Track	1000000086		0.0327406	µm/s	Track	1000008606
	0.013837	µm/s	Track	1000000090	km190-Fish1	0.0269398	µm/s	Track	1000000111		Column statistics
	0.00580864	µm/s	Track	1000000093		0.0267666	µm/s	Track	1000000121			Pre-PST-1	PST-1-ON
	0.0135042	µm/s	Track	1000000096		0.0357913	µm/s	Track	1000000123		Number of values	51	51
	0.00862615	µm/s	Track	1000000215		0.0186482	µm/s	Track	1000000126
	0.00919611	µm/s	Track	1000000216		0.0178783	µm/s	Track	1000000127		Minimum	0.005809	0.01072
	0.00908722	µm/s	Track	1000000218		0.0214615	µm/s	Track	1000000132		25% Percentile	0.008572	0.01732
	0.0126767	µm/s	Track	1000000219		0.0181705	µm/s	Track	1000000235		Median	0.01059	0.02054
	0.00873796	µm/s	Track	1000000224		0.0277808	µm/s	Track	1000000244		75% Percentile	0.0144	0.02665
	0.00824211	µm/s	Track	1000000225		0.0161455	µm/s	Track	1000000245		Maximum	0.02541	0.03579
	0.0152875	µm/s	Track	1000000227		0.0216934	µm/s	Track	1000000246
	0.00663145	µm/s	Track	1000000231		0.0315895	µm/s	Track	1000000250		Mean	0.01215	0.02178
	0.025405	µm/s	Track	1000020488		0.0129639	µm/s	Track	1000000278		Std. Deviation	0.004898	0.006104
	0.0106215	µm/s	Track	1000020548		0.0187836	µm/s	Track	1000000369		Std. Error of Mean	0.0006858	0.0008547
km190-Fish2	0.00896937	µm/s	Track	1000000094		0.0143731	µm/s	Track	1000020033
	0.0224651	µm/s	Track	1000000095		0.0227609	µm/s	Track	1000020057		Lower 95% CI of mean	0.01077	0.02007
	0.0131877	µm/s	Track	1000000097	km190-Fish2	0.0174709	µm/s	Track	1000000144		Upper 95% CI of mean	0.01353	0.0235
	0.011347	µm/s	Track	1000000098		0.0335359	µm/s	Track	1000000145
	0.00873985	µm/s	Track	1000000152		0.0165	µm/s	Track	1000000146		Sum	0.6197	1.111
	0.010502	µm/s	Track	1000000157		0.0233979	µm/s	Track	1000000254
	0.0109321	µm/s	Track	1000000173		0.0309911	µm/s	Track	1000000272
	0.0235218	µm/s	Track	1000000177		0.0199281	µm/s	Track	1000000283
	0.0207224	µm/s	Track	1000000179		0.0205427	µm/s	Track	1000000289
	0.0159342	µm/s	Track	1000000214		0.0107228	µm/s	Track	1000000298
	0.0138952	µm/s	Track	1000016675		0.0257357	µm/s	Track	1000000353
	0.0206172	µm/s	Track	1000016735		0.0202159	µm/s	Track	1000000408
	0.0180739	µm/s	Track	1000016850		0.0256125	µm/s	Track	1000024762
km191-Fish3	0.0126596	µm/s	Track	1000000055		0.0246779	µm/s	Track	1000024772
	0.0123694	µm/s	Track	1000000057	km191-Fish3	0.0150461	µm/s	Track	1000008680
	0.0203238	µm/s	Track	1000000063		0.0160886	µm/s	Track	1000008690
	0.00976098	µm/s	Track	1000000065		0.0187435	µm/s	Track	1000008695
	0.0144016	µm/s	Track	1000000083		0.0217041	µm/s	Track	1000008700
	0.0105789	µm/s	Track	1000000093		0.0220234	µm/s	Track	1000008704
	0.00857185	µm/s	Track	1000000121		0.0124034	µm/s	Track	1000011059
