# Supplementary material for: A role for the centrosome in regulating the rate of neuronal efferocytosis by microglia in vivo
Source: eLife. 2022 Nov 18;11:e82094. doi: 10.7554/eLife.82094 (PMC9674339; doi:10.7554/eLife.82094)
Supplement: Figure 3—source data 3. [file elife-82094-fig3-data3.xlsx]

## Sheet: Sheet1
ID	Set 1	Track Length	Unit	Duration (sec)	Speed (um/sec)		Statistics from Graphpad Prism 9
1000000000	30minpre	22.7567	um	1800	0.0126426		Number of families	1
1000000001	30minpre	31.3275	um	1800	0.0174042		Number of comparisons per family	3
1000000002	30minpre	11.7471	um	1800	0.00652617		Alpha	0.05
1000000003	30minpre	19.2109	um	1800	0.0106727
1000000004	30minpre	16.1105	um	1800	0.00895028		Friedman test
1000000005	30minpre	18.5284	um	1800	0.0102936		P value	<0,0001
1000000006	30minpre	17.6882	um	1800	0.00982678		Exact or approximate P value?	Approximate
1000000007	30minpre	37.1199	um	1800	0.0206222		P value summary	****
1000000008	30minpre	37.4511	um	1800	0.0208062		Are means signif. different? (P < 0.05)	Yes
1000000009	30minpre	27.5867	um	1800	0.0153259		Number of groups	3
1000000010	30minpre	18.9492	um	1800	0.0105273		Friedman statistic	21
1000000011	30minpre	35.6328	um	1800	0.019796
1000000012	30minpre	24.3433	um	1800	0.0135241		Data summary
1000000013	30minpre	28.597	um	1800	0.0158872		Number of treatments (columns)	3
1000000434	10minON	24.8199	um	600	0.0413665		Number of subjects (rows)	14
1000000435	10minON	14.0718	um	600	0.023453
1000000436	10minON	16.2056	um	600	0.0270093		Dunn's multiple comparisons test	Rank sum diff,	Significant?	Summary	Adjusted P Value
1000000437	10minON	14.8824	um	600	0.024804		Pre vs. ON	-21	Yes	***	0.0002	A-B
1000000438	10minON	9.14011	um	600	0.0152335		Pre vs. OFF	0	No	ns	>0,9999	A-C
1000000439	10minON	12.5235	um	600	0.0208725		ON vs. OFF	21	Yes	***	0.0002	B-C
1000000440	10minON	15.598	um	600	0.0259967
1000000441	10minON	21.739	um	600	0.0362317		Test details	Rank sum 1	Rank sum 2	Rank sum diff,	n1	n2	Z
1000000442	10minON	19.2885	um	600	0.0321475		Pre vs. ON	21	42	-21	14	14	3.969
1000000443	10minON	25.9808	um	600	0.0433013		Pre vs. OFF	21	21	0	14	14	0
1000000444	10minON	8.95007	um	600	0.0149168		ON vs. OFF	42	21	21	14	14	3.969
1000000445	10minON	30.6762	um	600	0.051127
1000000446	10minON	14.4689	um	600	0.0241148		Column statistics	Pre-PST-1	PST-1-ON	PST-1-OFF
1000000447	10minON	22.1734	um	600	0.0369557		Number of values	14	14	14
1000000574	20minOFF	11.3176	um	1200	0.00943133
1000000575	20minOFF	17.1267	um	1200	0.0142723		Minimum	0.006526	0.01492	0.006401
1000000576	20minOFF	13.0629	um	1200	0.0108858		25% Percentile	0.01018	0.02281	0.009107
1000000577	20minOFF	8.46492	um	1200	0.0070541		Median	0.01308	0.0265	0.01263
1000000578	20minOFF	16.9147	um	1200	0.0140956		75% Percentile	0.018	0.03806	0.01485
1000000579	20minOFF	9.76093	um	1200	0.00813411		Maximum	0.02081	0.05113	0.0304
1000000580	20minOFF	7.68109	um	1200	0.00640091
1000000581	20minOFF	32.3436	um	1200	0.026953		Mean	0.01377	0.02982	0.01396
1000000582	20minOFF	14.5664	um	1200	0.0121387		Std. Deviation	0.004622	0.01075	0.006924
1000000583	20minOFF	19.8246	um	1200	0.0165205		Std. Error of Mean	0.001235	0.002873	0.00185
1000000584	20minOFF	15.7398	um	1200	0.0131165
1000000585	20minOFF	14.1821	um	1200	0.0118184		Lower 95% CI	0.0111	0.02362	0.009967
1000000586	20minOFF	17.1471	um	1200	0.0142892		Upper 95% CI	0.01644	0.03603	0.01796
1000000587	20minOFF	36.4784	um	1200	0.0303987
							Mean ranks	1.5	3	1.5
