# Supplementary material for: A role for the centrosome in regulating the rate of neuronal efferocytosis by microglia in vivo
Source: eLife. 2022 Nov 18;11:e82094. doi: 10.7554/eLife.82094 (PMC9674339; doi:10.7554/eLife.82094)
Supplement: Figure 3—source data 4. [file elife-82094-fig3-data4.xlsx]

## Sheet: Km187_DMSO_Fish1
Experiment	Treatment	Cell	NBM	BM	total	%NBM	%BM		Statistics from Graphpad Prism 9
km187-Fish1	DMSO	1	0	2	2	0	1		Column A	DMSO
	DMSO	2	1	1	2	0.5	0.5		vs.	vs,
	DMSO	4	0	1	1	0	1		Column B	Pre-PST-1
	DMSO	5	0	5	5	0	1		vs.	vs,
	DMSO	6	1	4	5	0.2	0.8		Column C	PST-1-ON
km187-Fish2	DMSO	1	0	6	6	0	1		Kruskal-Wallis test
	DMSO	2	1	5	6	0.166667	0.833333		P value	0.8523
	DMSO	3	0	3	3	0	1		Exact or approximate P value?	Approximate
	DMSO	4	0	1	1	0	1		P value summary	ns
	DMSO	5	0	1	1	0	1		Do the medians vary signif. (P < 0.05)?	No
	DMSO	6	1	4	5	0.2	0.8		Number of groups	3
	DMSO	7	1	1	2	0.5	0.5		Kruskal-Wallis statistic	0.3197
km190-Exp1-Fish1	DMSO	1	0	4	4	0	1		Data summary
	DMSO	2	1	1	2	0.5	0.5		Number of treatments (columns)	3
	DMSO	3	0	5	5	0	1		Number of values (total)	56
	DMSO	4	0	2	2	0	1
	DMSO	5	0	3	3	0	1		Dunn's multiple comparisons test	Mean rank diff,	Significant?	Summary	Adjusted P Value
	DMSO	6	0	3	3	0	1		DMSO vs. Pre-PST-1	0.7861	No	ns	>0,9999	A-B
	DMSO	7	3	1	4	0.75	0.25		DMSO vs. PST-1-ON	2.869	No	ns	>0,9999	A-C
	DMSO	8	3	1	4	0.75	0.25		Pre-PST-1 vs. PST-1-ON	2.083	No	ns	>0,9999	B-C
km190-Exp5-Fish1	Pre-PST-1	1	1	1	2	0.5	0.5		Test details	Mean rank 1	Mean rank 2	Mean rank diff,	n1	n2	Z
	Pre-PST-1	2	0	5	5	0	1		DMSO vs. Pre-PST-1	29.68	28.89	0.7861	20	18	0.1511
	Pre-PST-1	3	2	1	3	0.666667	0.333333		DMSO vs. PST-1-ON	29.68	26.81	2.869	20	18	0.5514
	Pre-PST-1	4	1	4	5	0.2	0.8		Pre-PST-1 vs. PST-1-ON	28.89	26.81	2.083	18	18	0.3902
	Pre-PST-1	5	2	2	4	0.5	0.5
	Pre-PST-1	6	1	1	2	0.5	0.5		Column statistics
										DMSO	Pre-PST-1	PST-1-ON
	PST-1-ON	1	2	0	2	1	0		Number of values	20	18	18
	PST-1-ON	2	4	1	5	0.8	0.2
	PST-1-ON	3	1	0	1	1	0		Minimum	1	0	0
	PST-1-ON	4	0	0	0	0	0		25% Percentile	2	2	2
	PST-1-ON	5	4	0	4	1	0		Median	3	3	3
	PST-1-ON	6	3	0	3	1	0		75% Percentile	5	4.25	4
									Maximum	6	6	6
km190-Exp5-Fish2	Pre-PST-1	1	1	2	3	0.333333	0.666667
	Pre-PST-1	2	0	6	6	0	1		Mean	3.3	3.167	2.944
	Pre-PST-1	3	1	1	2	0.5	0.5		Std. Deviation	1.658	1.618	1.552
	Pre-PST-1	4	2	2	4	0.5	0.5		Std. Error of Mean	0.3706	0.3813	0.3658
	Pre-PST-1	5	1	2	3	0.333333	0.666667
	Pre-PST-1	6	0	3	3	0	1		Lower 95% CI of mean	2.524	2.362	2.173
									Upper 95% CI of mean	4.076	3.971	3.716
	PST-1-ON	1	3	1	4	0.75	0.25
	PST-1-ON	2	5	1	6	0.833333	0.166667		Sum	66	57	53
	PST-1-ON	3	1	0	1	1	0
	PST-1-ON	4	0	5	5	0	1
	PST-1-ON	5	2	1	3	0.666667	0.333333
	PST-1-ON	6	3	0	3	1	0
km188-Exp2-Fish2	Pre-PST-1	1	0	0	0	#DIV/0!	#DIV/0!
	Pre-PST-1	2	1	2	3	0.333333	0.666667
	Pre-PST-1	3	0	1	1	0	1
	Pre-PST-1	4	2	1	3	0.666667	0.333333
	Pre-PST-1	5	0	2	2	0	1
	Pre-PST-1	6	0	6	6	0	1
	PST-1-ON	1	2	2	4	0.5	0.5
	PST-1-ON	2	1	2	3	0.333333	0.666667
	PST-1-ON	3	2	0	2	1	0
	PST-1-ON	4	1	1	2	0.5	0.5
	PST-1-ON	5	3	0	3	1	0
	PST-1-ON	6	1	1	2	0.5	0.5
