# Supplementary material for: A role for the centrosome in regulating the rate of neuronal efferocytosis by microglia in vivo
Source: eLife. 2022 Nov 18;11:e82094. doi: 10.7554/eLife.82094 (PMC9674339; doi:10.7554/eLife.82094)
Supplement: Figure 4—source data 1. [file elife-82094-fig4-data1.xlsx]

## Sheet: Centrin_Cellbody
		Formula to calculate distances between 2 points in 3D
		Centrin			Cell body			distance in units			distance in um
Timepoint	Time	X1	Y2	Z2	X2	Y2	Z2	dX	dY	dZ	dX (0.116)	dY (0.116)	dZ (0.5um)	Distance = SQRT(dX^2 + dY^2 + dZ^2)	Phagosome appearance
1	00:00:00	183	209	19	220.833	161.5	25	37.8333	-47.5	6	4.38867	-5.51	3	7.6564
2	00:00:20	187	221	22	224.167	175.5	25	37.1667	-45.5	3	4.31133	-5.278	1.5	6.97817
3	00:00:40	181	226	24	223.5	178.833	29	42.5	-47.1667	5	4.93	-5.47133	2.5	7.77756
4	00:01:00	175	226	23	220.833	178.833	28	45.8333	-47.1667	5	5.31667	-5.47133	2.5	8.02823
5	00:01:20	177	226	25	223.5	176.833	29	46.5	-49.1667	4	5.394	-5.70333	2	8.10082
6	00:01:40	178	226	23	222.833	174.167	29	44.8333	-51.8333	6	5.20067	-6.01267	3	8.49701
7	00:02:00	177	220	24	228.167	174.167	29	51.1667	-45.8333	5	5.93533	-5.31667	2.5	8.35135
8	00:02:20	173	217	24	225.5	174.167	28	52.5	-42.8333	4	6.09	-4.96867	2	8.11022
9	00:02:40	175	216	21	224.833	173.5	28	49.8333	-42.5	7	5.78067	-4.93	3.5	8.36487
10	00:03:00	165	215	22	225.5	176.167	28	60.5	-38.8333	6	7.018	-4.50467	3	8.86252
11	00:03:20	165	216	23	225.5	177.5	29	60.5	-38.5	6	7.018	-4.466	3	8.84293
12	00:03:40	173	212	23	224.833	178.167	29	51.8333	-33.8333	6	6.01267	-3.92467	3	7.78172
13	00:04:00	176	214	22	223.5	178.833	28	47.5	-35.1667	6	5.51	-4.07933	3	7.48339
14	00:04:20	174	214	22	224.833	181.5	27	50.8333	-32.5	5	5.89667	-3.77	2.5	7.43193
15	00:04:40	171	214	21	222.833	182.167	27	51.8333	-31.8333	6	6.01267	-3.69267	3	7.66733
16	00:05:00	180	218	22	222.833	184.167	27	42.8333	-33.8333	5	4.96867	-3.92467	2.5	6.8074
17	00:05:20	181	220	21	219.5	183.5	26	38.5	-36.5	5	4.466	-4.234	2.5	6.64243
18	00:05:40	179	220	22	216.833	184.833	26	37.8333	-35.1667	4	4.38867	-4.07933	2	6.31675
19	00:06:00	180	219	18	218.167	185.5	26	38.1667	-33.5	8	4.42733	-3.886	4	7.12055
20	00:06:20	183	220	20	214.833	186.833	27	31.8333	-33.1667	7	3.69267	-3.84733	3.5	6.3787
21	00:06:40	173	226	18	215.5	188.833	26	42.5	-37.1667	8	4.93	-4.31133	4	7.67414
22	00:07:00	176	232	18	212.167	191.5	25	36.1667	-40.5	7	4.19533	-4.698	3.5	7.20569
23	00:07:20	168	228	18	212.167	188.833	26	44.1667	-39.1667	8	5.12333	-4.54333	4	7.93035
24	00:07:40	170	222	17	214.833	190.833	26	44.8333	-31.1667	9	5.20067	-3.61533	4.5	7.76966
25	00:08:00	167	230	17	214.167	191.5	25	47.1667	-38.5	8	5.47133	-4.466	4	8.11669
26	00:08:20	163	226	18	212.833	194.167	26	49.8333	-31.8333	8	5.78067	-3.69267	4	7.94052
27	00:08:40	152	234	18	208.833	193.5	25	56.8333	-40.5	7	6.59267	-4.698	3.5	8.81955
28	00:09:00	154	236	17	209.5	194.833	25	55.5	-41.1667	8	6.438	-4.77533	4	8.95833
29	00:09:20	151	240	17	208.833	194.833	25	57.8333	-45.1667	8	6.70867	-5.23933	4	9.40515
30	00:09:40	144	242	18	208.167	194.833	25	64.1667	-47.1667	7	7.44333	-5.47133	3.5	9.8787
31	00:10:00	133	248	15	207.5	197.5	26	74.5	-50.5	11	8.642	-5.858	5.5	11.8004
32	00:10:20	138	248	16	208.167	197.5	25	70.1667	-50.5	9	8.13933	-5.858	4.5	10.9916
33	00:10:40	147	246	16	208.167	194.167	26	61.1667	-51.8333	10	7.09533	-6.01267	5	10.5592
34	00:11:00	133	244	16	206.833	196.833	26	73.8333	-47.1667	10	8.56467	-5.47133	5	11.3265
35	00:11:20	109	247	16	204.167	198.167	26	95.1667	-48.8333	10	11.0393	-5.66467	5	13.3774
36	00:11:40	87	250	16	204.167	196.167	25	117.167	-53.8333	9	13.5913	-6.24467	4.5	15.6195
37	00:12:00	59	264	14	203.5	200.167	24	144.5	-63.8333	10	16.762	-7.40467	5	18.9946
38	00:12:20	47	271	11	202.167	203.5	25	155.167	-67.5	14	17.9993	-7.83	7	20.8395
39	00:12:40	45	275	11	199.5	200.167	23	154.5	-74.8333	12	17.922	-8.68067	6	20.7979
40	00:13:00	50	269	11	196.167	200.833	23	146.167	-68.1667	12	16.9553	-7.90733	6	19.6471
41	00:13:20	40	282	9	196.167	200.833	22	156.167	-81.1667	13	18.1153	-9.41533	6.5	21.4258
42	00:13:40	28	288	8	193.5	201.5	21	165.5	-86.5	13	19.198	-10.034	6.5	22.6162	1
43	00:14:00	33	291	7	186.167	206.833	19	153.167	-84.1667	12	17.7673	-9.76333	6	21.1424
44	00:14:20	39	298	7	188.833	206.167	19	149.833	-91.8333	12	17.3807	-10.6527	6	21.2501
45	00:14:40	35	298	8	188.833	203.5	19	153.833	-94.5	11	17.8447	-10.962	5.5	21.6529
46	00:15:00	40	292	10	192.167	203.5	22	152.167	-88.5	12	17.6513	-10.266	6	21.2829
47	00:15:20	43	291	11	192.167	204.833	22	149.167	-86.1667	11	17.3033	-9.99533	5.5	20.7259
48	00:15:40	47	298	11	192.833	202.833	21	145.833	-95.1667	10	16.9167	-11.0393	5	20.8096
49	00:16:00	51	296	10	195.5	198.833	22	144.5	-97.1667	12	16.762	-11.2713	6	21.0715
50	00:16:20	65	285	10	194.833	201.5	21	129.833	-83.5	11	15.0607	-9.686	5.5	18.7321
51	00:16:40	63	280	11	194.167	201.5	22	131.167	-78.5	11	15.2153	-9.106	5.5	18.5654
52	00:17:00	69	282	10	193.5	202.167	22	124.5	-79.8333	12	14.442	-9.26067	6	18.175
53	00:17:20	72	282	10	192.833	203.5	22	120.833	-78.5	12	14.0167	-9.106	6	17.7591
54	00:17:40	72	278	12	196.167	203.5	22	124.167	-74.5	10	14.4033	-8.642	5	17.5254
55	00:18:00	80.8333	267.5	12	197.5	200.833	22	116.667	-66.6667	10	13.5333	-7.73333	5	16.3693
56	00:18:20	81.5	270.167	14	200.167	203.5	22	118.667	-66.6667	8	13.7653	-7.73333	4	16.2877
57	00:18:40	88.8333	268.167	12	199.5	201.5	22	110.667	-66.6667	10	12.8373	-7.73333	5	15.7988
58	00:19:00	84.8333	270.833	12	199.5	201.5	22	114.667	-69.3333	10	13.3013	-8.04267	5	16.3282
59	00:19:20	94.8333	265.5	13	198.167	201.5	23	103.333	-64	10	11.9867	-7.424	5	14.9598
60	00:19:40	102.833	260.833	14	200.167	202.833	23	97.3333	-58	9	11.2907	-6.728	4.5	13.8923
61	00:20:00	114.167	250.167	14	198.167	200.833	23	84	-49.3333	9	9.744	-5.72267	4.5	12.1632
62	00:20:20	113.5	251.5	14	200.167	200.833	23	86.6667	-50.6667	9	10.0533	-5.87733	4.5	12.4845
63	00:20:40	120.167	250.833	13	200.167	200.833	23	80	-50	10	9.28	-5.8	5	12.0316
64	00:21:00	120.167	244.833	15	200.167	198.833	23	80	-46	8	9.28	-5.336	4	11.4277
65	00:21:20	116.167	246.167	16	202.167	196.833	23	86	-49.3333	7	9.976	-5.72267	3.5	12.0216
66	00:21:40	116.167	250.833	15	197.5	197.5	22	81.3333	-53.3333	7	9.43467	-6.18667	3.5	11.8126
67	00:22:00	114.167	244.167	14	198.833	198.833	22	84.6667	-45.3333	8	9.82133	-5.25867	4	11.8369
68	00:22:20	110.833	249.5	14	196.833	199.5	23	86	-50	9	9.976	-5.8	4.5	12.3859
69	00:22:40	100.833	253.5	13	196.833	198.833	22	96	-54.6667	9	11.136	-6.34133	4.5	13.5821
70	00:23:00	109.5	250.833	13	198.833	201.5	23	89.3333	-49.3333	10	10.3627	-5.72267	5	12.8504
71	00:23:20	117.5	247.5	15	197.5	198.167	22	80	-49.3333	7	9.28	-5.72267	3.5	11.4506
72	00:23:40	113.5	250.833	14	197.5	198.167	22	84	-52.6667	8	9.744	-6.10933	4	12.1766
73	00:24:00	102.833	254.167	13	197.5	200.833	24	94.6667	-53.3333	11	10.9813	-6.18667	5.5	13.7519
74	00:24:20	100.833	254.167	13	198.167	198.833	23	97.3333	-55.3333	10	11.2907	-6.41867	5	13.9168
75	00:24:40	114.833	248.167	13	197.5	198.167	22	82.6667	-50	9	9.58933	-5.8	4.5	12.0766
76	00:25:00	124.167	239.5	14	196.167	200.833	23	72	-38.6667	9	8.352	-4.48533	4.5	10.494
77	00:25:20	120.833	244.833	13	196.167	200.833	23	75.3333	-44	10	8.73867	-5.104	5	11.2878
78	00:25:40	114.833	247.5	13	196.167	200.833	22	81.3333	-46.6667	9	9.43467	-5.41333	4.5	11.7715
79	00:26:00	138.833	244.833	16	198.833	199.5	23	60	-45.3333	7	6.96	-5.25867	3.5	9.39921
80	00:26:20	152.167	243.5	17	199.5	197.5	22	47.3333	-46	5	5.49067	-5.336	2.5	8.05421
81	00:26:40	158.167	241.5	19	198.833	198.167	23	40.6667	-43.3333	4	4.71733	-5.02667	2	7.17779
82	00:27:00	150.167	242.833	19	198.167	202.167	24	48	-40.6667	5	5.568	-4.71733	2.5	7.714
83	00:27:20	172.167	252.833	21	198.167	198.833	23	26	-54	2	3.016	-6.264	1	7.02381
84	00:27:40	174.167	250.833	22	197.5	201.5	23	23.3333	-49.3333	1	2.70667	-5.72267	0.5	6.35019
85	00:28:00	172.833	253.5	23	195.5	202.833	23	22.6667	-50.6667	0	2.62933	-5.87733	0	6.43867
86	00:28:20	181.5	258.833	25	196.833	204.167	23	15.3333	-54.6667	-2	1.77867	-6.34133	-1	6.66154
87	00:28:40	200.167	284.833	28	191.5	207.5	22	-8.66667	-77.3333	-6	-1.00533	-8.97067	-3	9.51228
88	00:29:00	214.167	306.833	32	192.833	205.5	22	-21.3333	-101.333	-10	-2.47467	-11.7547	-5	13.0114
89	00:29:20	213.5	314.167	36	192.833	204.167	23	-20.6667	-110	-13	-2.39733	-12.76	-6.5	14.5195
90	00:29:40	208.833	315.5	36	196.167	206.167	23	-12.6667	-109.333	-13	-1.46933	-12.6827	-6.5	14.3269
91	00:30:00	204.167	322.167	38	198.167	208.167	23	-6	-114	-15	-0.696	-13.224	-7.5	15.2187
92	00:30:20	209.5	318.167	37	195.5	206.833	23	-14	-111.333	-14	-1.624	-12.9147	-7	14.7792
93	00:30:40	208.167	310.167	34	196.167	204.833	22	-12	-105.333	-12	-1.392	-12.2187	-6	13.6833	1
94	00:31:00	210.833	318.167	36	197.5	207.5	22	-13.3333	-110.667	-14	-1.54667	-12.8373	-7	14.7034
95	00:31:20	212.167	320.833	34	197.5	208.167	23	-14.6667	-112.667	-11	-1.70133	-13.0693	-5.5	14.2812
96	00:31:40	212.167	318.167	34	197.5	207.5	22	-14.6667	-110.667	-12	-1.70133	-12.8373	-6	14.2721
97	00:32:00	214.833	320.833	34	196.833	206.833	23	-18	-114	-11	-2.088	-13.224	-5.5	14.4736
98	00:32:20	212.167	297.5	31	196.833	210.833	21	-15.3333	-86.6667	-10	-1.77867	-10.0533	-5	11.3681
99	00:32:40	207.5	288.833	29	200.833	209.5	25	-6.66667	-79.3333	-4	-0.773333	-9.20267	-2	9.44919
100	00:33:00	199.5	275.5	26	200.833	209.5	24	1.33333	-66	-2	0.154667	-7.656	-1	7.72258
101	00:33:20	203.5	268.833	26	201.5	209.5	24	-2	-59.3333	-2	-0.232	-6.88267	-1	6.9588
102	00:33:40	206.167	279.5	28	204.833	206.167	24	-1.33333	-73.3333	-4	-0.154667	-8.50667	-2	8.73998
103	00:34:00	209.5	275.5	28	203.5	207.5	24	-6	-68	-4	-0.696	-7.888	-2	8.16731
104	00:34:20	210.167	280.167	29	203.5	212.833	26	-6.66667	-67.3333	-3	-0.773333	-7.81067	-1.5	7.9909
105	00:34:40	212.167	281.5	28	207.5	212.833	26	-4.66667	-68.6667	-2	-0.541333	-7.96533	-1	8.04609
106	00:35:00	213.5	283.5	30	208.833	214.833	25	-4.66667	-68.6667	-5	-0.541333	-7.96533	-2.5	8.36598
107	00:35:20	213.5	285.5	29	206.833	212.167	26	-6.66667	-73.3333	-3	-0.773333	-8.50667	-1.5	8.67245
108	00:35:40	211.5	280.833	28	206.833	212.167	25	-4.66667	-68.6667	-3	-0.541333	-7.96533	-1.5	8.1234
109	00:36:00	207.5	272.833	28	206.833	208.167	25	-0.666667	-64.6667	-3	-0.0773333	-7.50133	-1.5	7.65023
110	00:36:20	208.167	272.833	27	208.167	211.5	25	0	-61.3333	-2	0	-7.11467	-1	7.1846
111	00:36:40	215.5	280.833	29	208.167	208.167	25	-7.33333	-72.6667	-4	-0.850667	-8.42933	-2	8.70502
112	00:37:00	209.5	272.833	26	209.5	208.167	24	0	-64.6667	-2	0	-7.50133	-1	7.56769
113	00:37:20	206.833	271.5	27	212.167	210.833	24	5.33333	-60.6667	-3	0.618667	-7.03733	-1.5	7.22197
114	00:37:40	212.167	276.833	28	210.833	209.5	25	-1.33333	-67.3333	-3	-0.154667	-7.81067	-1.5	7.9549
115	00:38:00	210.167	273.5	28	206.833	208.167	25	-3.33333	-65.3333	-3	-0.386667	-7.57867	-1.5	7.73535
116	00:38:20	206.167	276.833	28	208.833	208.167	24	2.66667	-68.6667	-4	0.309333	-7.96533	-2	8.21841
117	00:38:40	202.833	274.167	27	207.5	207.5	25	4.66667	-66.6667	-2	0.541333	-7.73333	-1	7.81649
118	00:39:00	202.833	276.833	27	207.5	207.5	25	4.66667	-69.3333	-2	0.541333	-8.04267	-1	8.12266
119	00:39:20	197.5	270.167	25	206.167	206.833	25	8.66667	-63.3333	0	1.00533	-7.34667	0	7.41513
120	00:39:40	193.5	266.167	25	204.167	207.5	25	10.6667	-58.6667	0	1.23733	-6.80533	0	6.9169
121	00:40:00	184.167	258.833	25	203.5	208.167	24	19.3333	-50.6667	-1	2.24267	-5.87733	-0.5	6.31052
122	00:40:20	190.833	263.5	25	202.833	207.5	25	12	-56	0	1.392	-6.496	0	6.64347
123	00:40:40	169.5	252.833	24	201.5	209.5	25	32	-43.3333	1	3.712	-5.02667	0.5	6.26868
124	00:41:00	158.167	242.167	22	202.167	206.833	24	44	-35.3333	2	5.104	-4.09867	1	6.62192
125	00:41:20	161.5	238.833	18	202.167	210.167	24	40.6667	-28.6667	6	4.71733	-3.32533	3	6.5047
126	00:41:40	153.5	239.5	19	201.5	206.833	24	48	-32.6667	5	5.568	-3.78933	2.5	7.18413
127	00:42:00	141.5	234.167	16	203.5	207.5	24	62	-26.6667	8	7.192	-3.09333	4	8.79168
128	00:42:20	149.5	236.167	18	200.833	202.167	24	51.3333	-34	6	5.95467	-3.944	3	7.74682
129	00:42:40	140.167	227.5	17	198.833	206.167	23	58.6667	-21.3333	6	6.80533	-2.47467	3	7.83815
130	00:43:00	142.167	234.833	17	200.833	206.833	24	58.6667	-28	7	6.80533	-3.248	3.5	8.31337
131	00:43:20	167.5	242.167	19	201.5	206.833	24	34	-35.3333	5	3.944	-4.09867	2.5	6.21323
132	00:43:40	163.5	239.5	19	200.833	207.5	23	37.3333	-32	4	4.33067	-3.712	2	6.0443
133	00:44:00	142.167	230.833	17	202.167	204.833	24	60	-26	7	6.96	-3.016	3.5	8.35391
134	00:44:20	145.5	233.5	17	199.5	204.833	23	54	-28.6667	6	6.264	-3.32533	3	7.70036
135	00:44:40	144.833	235.5	18	197.5	203.5	23	52.6667	-32	5	6.10933	-3.712	2.5	7.57317
136	00:45:00	148.167	230.167	18	197.5	203.5	24	49.3333	-26.6667	6	5.72267	-3.09333	3	7.16363
137	00:45:20	167.5	245.5	17	201.5	204.833	24	34	-40.6667	7	3.944	-4.71733	3.5	7.07519
138	00:45:40	164.167	235.5	21	198.833	199.5	24	34.6667	-36	3	4.02133	-4.176	1.5	5.98833
139	00:46:00	130.167	226.167	16	200.167	204.833	24	70	-21.3333	8	8.12	-2.47467	4	9.38394
140	00:46:20	104.833	223.5	13	197.5	208.833	24	92.6667	-14.6667	11	10.7493	-1.70133	5.5	12.194
141	00:46:40	86.1667	228.833	13	193.5	204.833	24	107.333	-24	11	12.4507	-2.784	5.5	13.8932
142	00:47:00	73.5	230.167	13	188.167	204.833	23	114.667	-25.3333	10	13.3013	-2.93867	5	14.5107
143	00:47:20	86.1667	222.167	16	185.5	202.833	22	99.3333	-19.3333	6	11.5227	-2.24267	3	12.1162
144	00:47:40	77.5	220.833	16	188.167	202.833	22	110.667	-18	6	12.8373	-2.088	3	13.3475
145	00:48:00	52.8333	221.5	16	186.167	203.5	22	133.333	-18	6	15.4667	-2.088	3	15.8927
146	00:48:20	33.5	224.833	16	190.167	204.167	22	156.667	-20.6667	6	18.1733	-2.39733	3	18.5746	1
147	00:48:40	59.5	226.167	15	192.167	204.833	22	132.667	-21.3333	7	15.3893	-2.47467	3.5	15.9752
148	00:49:00	82.8333	221.5	16	193.5	205.5	22	110.667	-16	6	12.8373	-1.856	3	13.3132
149	00:49:20	100.167	220.833	16	196.167	202.833	22	96	-18	6	11.136	-2.088	3	11.7205
150	00:49:40	120.833	220.833	16	196.833	204.833	23	76	-16	7	8.816	-1.856	3.5	9.66523
151	00:50:00	148.167	224.833	20	198.167	205.5	22	50	-19.3333	2	5.8	-2.24267	1	6.29838
152	00:50:20	155.5	230.167	18	197.5	205.5	22	42	-24.6667	4	4.872	-2.86133	2	5.99363
153	00:50:40	160.833	231.5	18	196.833	204.833	23	36	-26.6667	5	4.176	-3.09333	2.5	5.76695
154	00:51:00	170.833	248.833	22	197.5	206.833	23	26.6667	-42	1	3.09333	-4.872	0.5	5.79268
155	00:51:20	182.833	258.833	23	198.167	207.5	22	15.3333	-51.3333	-1	1.77867	-5.95467	-0.5	6.23472
156	00:51:40	172.167	253.5	22	198.167	210.167	24	26	-43.3333	2	3.016	-5.02667	1	5.94673
157	00:52:00	157.5	238.833	21	196.833	207.5	23	39.3333	-31.3333	2	4.56267	-3.63467	1	5.91851
158	00:52:20	168.167	250.167	21	196.167	206.167	22	28	-44	1	3.248	-5.104	0.5	6.07045
159	00:52:40	174.167	252.167	21	198.167	205.5	22	24	-46.6667	1	2.784	-5.41333	0.5	6.10777
160	00:53:00	174.833	246.833	22	196.167	210.167	24	21.3333	-36.6667	2	2.47467	-4.25333	1	5.02144
161	00:53:20	169.5	249.5	22	195.5	208.167	23	26	-41.3333	1	3.016	-4.79467	0.5	5.68639
162	00:53:40	170.167	248.833	22	194.167	210.833	24	24	-38	2	2.784	-4.408	1	5.30859
163	00:54:00	166.833	244.833	20	194.167	210.833	23	27.3333	-34	3	3.17067	-3.944	1.5	5.27809
164	00:54:20	166.167	242.167	21	196.833	216.167	23	30.6667	-26	2	3.55733	-3.016	1	4.76979
165	00:54:40	166.167	244.833	20	196.167	212.167	24	30	-32.6667	4	3.48	-3.78933	2	5.51991
166	00:55:00	169.5	243.5	18	194.833	214.167	24	25.3333	-29.3333	6	2.93867	-3.40267	3	5.40499
167	00:55:20	168.833	246.833	22	196.167	210.167	23	27.3333	-36.6667	1	3.17067	-4.25333	0.5	5.3286
168	00:55:40	174.167	253.5	22	196.833	210.833	23	22.6667	-42.6667	1	2.62933	-4.94933	0.5	5.62666
169	00:56:00	166.833	236.833	29	196.833	210.833	24	30	-26	-5	3.48	-3.016	-2.5	5.23991
170	00:56:20	170.167	236.833	31	196.167	210.833	23	26	-26	-8	3.016	-3.016	-4	5.84744
171	00:56:40	168.167	239.5	29	196.167	210.833	23	28	-28.6667	-6	3.248	-3.32533	-3	5.53239
172	00:57:00	168.167	248.833	24	194.833	213.5	23	26.6667	-35.3333	-1	3.09333	-4.09867	-0.5	5.15924
173	00:57:20	162.833	241.5	29	192.833	214.167	23	30	-27.3333	-6	3.48	-3.17067	-3	5.58243
174	00:57:40	163.5	239.5	29	193.5	209.5	23	30	-30	-6	3.48	-3.48	-3	5.76375
175	00:58:00	164.167	240.833	31	198.167	209.5	22	34	-31.3333	-9	3.944	-3.63467	-4.5	7.00114
176	00:58:20	165.5	242.167	32	194.833	208.167	23	29.3333	-34	-9	3.40267	-3.944	-4.5	6.88355
177	00:58:40	163.5	243.5	32	194.833	208.167	23	31.3333	-35.3333	-9	3.63467	-4.09867	-4.5	7.08942
178	00:59:00	163.5	244.833	31	196.833	204.167	23	33.3333	-40.6667	-8	3.86667	-4.71733	-4	7.29413
179	00:59:20	166.167	238.167	31	198.833	208.167	24	32.6667	-30	-7	3.78933	-3.48	-3.5	6.2225
180	00:59:40	166.833	238.167	32	200.833	206.833	23	34	-31.3333	-9	3.944	-3.63467	-4.5	7.00114
181	01:00:00	165.5	239.5	30	201.5	205.5	23	36	-34	-7	4.176	-3.944	-3.5	6.72637
182	01:00:20	164.833	235.5	25	202.833	205.5	23	38	-30	-2	4.408	-3.48	-1	5.70446	1
183	01:00:40	171.5	235.5	30	204.167	208.833	23	32.6667	-26.6667	-7	3.78933	-3.09333	-3.5	6.01479
184	01:01:00	178.167	236.833	32	207.5	207.5	23	29.3333	-29.3333	-9	3.40267	-3.40267	-4.5	6.58834
185	01:01:20	178.833	234.167	33	208.167	204.833	24	29.3333	-29.3333	-9	3.40267	-3.40267	-4.5	6.58834
186	01:01:40	175.5	228.167	33	208.167	205.5	23	32.6667	-22.6667	-10	3.78933	-2.62933	-5	6.80238
187	01:02:00	172.167	227.5	32	208.167	205.5	24	36	-22	-8	4.176	-2.552	-4	6.32073
188	01:02:20	173.5	222.167	31	208.167	204.167	23	34.6667	-18	-8	4.02133	-2.088	-4	6.04408
189	01:02:40	172.167	220.833	28	210.167	204.833	24	38	-16	-4	4.408	-1.856	-2	5.18413
190	01:03:00	172.167	224.833	28	210.167	204.833	23	38	-20	-5	4.408	-2.32	-2.5	5.57341
191	01:03:20	173.5	222.833	28	212.167	202.833	22	38.6667	-20	-6	4.48533	-2.32	-3	5.87372
192	01:03:40	170.167	219.5	26	212.167	203.5	23	42	-16	-3	4.872	-1.856	-1.5	5.42505
193	01:04:00	172.833	216.833	26	214.167	203.5	23	41.3333	-13.3333	-3	4.79467	-1.54667	-1.5	5.25652
194	01:04:20	172.833	214.167	27	214.167	201.5	22	41.3333	-12.6667	-5	4.79467	-1.46933	-2.5	5.60337
195	01:04:40	174.833	220.833	27	214.167	201.5	23	39.3333	-19.3333	-4	4.56267	-2.24267	-2	5.46328
196	01:05:00	172.833	218.833	26	214.833	197.5	22	42	-21.3333	-4	4.872	-2.47467	-2	5.81897
197	01:05:20	170.833	232.833	28	210.833	198.833	22	40	-34	-6	4.64	-3.944	-3	6.78857
198	01:05:40	172.167	230.167	28	206.833	198.167	22	34.6667	-32	-6	4.02133	-3.712	-3	6.241
199	01:06:00	173.5	226.167	26	212.833	198.167	20	39.3333	-28	-6	4.56267	-3.248	-3	6.35354
200	01:06:20	169.5	222.167	28	211.5	196.167	21	42	-26	-7	4.872	-3.016	-3.5	6.71436
201	01:06:40	165.5	246.167	28	208.833	197.5	22	43.3333	-48.6667	-6	5.02667	-5.64533	-3	8.13248
202	01:07:00	165.5	243.5	27	206.833	199.5	21	41.3333	-44	-6	4.79467	-5.104	-3	7.61838
203	01:07:20	165.5	245.5	27	208.833	198.167	20	43.3333	-47.3333	-7	5.02667	-5.49067	-3.5	8.22586
204	01:07:40	165.5	246.833	27	208.833	198.167	20	43.3333	-48.6667	-7	5.02667	-5.64533	-3.5	8.3299
205	01:08:00	161.5	260.833	27	208.833	195.5	20	47.3333	-65.3333	-7	5.49067	-7.57867	-3.5	9.99168
206	01:08:20	156.833	270.833	27	208.833	194.833	19	52	-76	-8	6.032	-8.816	-4	11.4064
207	01:08:40	152.167	284.833	25	208.167	194.833	20	56	-90	-5	6.496	-10.44	-2.5	12.5476
208	01:09:00	152.167	298.833	26	210.833	193.5	20	58.6667	-105.333	-6	6.80533	-12.2187	-3	14.3041
209	01:09:20	160.833	280.833	25	211.5	190.167	20	50.6667	-90.6667	-5	5.87733	-10.5173	-2.5	12.3048
210	01:09:40	162.833	278.167	25	212.833	188.167	19	50	-90	-6	5.8	-10.44	-3	12.314
211	01:10:00	163.5	272.167	26	214.167	186.167	19	50.6667	-86	-7	5.87733	-9.976	-3.5	12.096
212	01:10:20	165.5	266.167	26	217.5	184.167	19	52	-82	-7	6.032	-9.512	-3.5	11.7946
213	01:10:40	169.5	266.833	26	215.5	184.167	18	46	-82.6667	-8	5.336	-9.58933	-4	11.6802
214	01:11:00	169.5	262.167	25	218.833	183.5	18	49.3333	-78.6667	-7	5.72267	-9.12533	-3.5	11.3257
215	01:11:20	165.5	266.167	25	218.167	182.167	17	52.6667	-84	-8	6.10933	-9.744	-4	12.1766	1
216	01:11:40	170.833	264.833	26	220.833	181.5	17	50	-83.3333	-9	5.8	-9.66667	-4.5	12.1381
217	01:12:00	173.5	252.833	24	220.833	181.5	16	47.3333	-71.3333	-8	5.49067	-8.27467	-4	10.706
218	01:12:20	174.167	246.167	24	220.833	180.833	17	46.6667	-65.3333	-7	5.41333	-7.57867	-3.5	9.94939
219	01:12:40	171.5	242.833	24	221.5	178.833	17	50	-64	-7	5.8	-7.424	-3.5	10.0502
220	01:13:00	173.5	255.5	24	221.5	178.833	17	48	-76.6667	-7	5.568	-8.89333	-3.5	11.0609
221	01:13:20	168.167	250.833	24	222.833	178.167	16	54.6667	-72.6667	-8	6.34133	-8.42933	-4	11.2812
222	01:13:40	171.5	237.5	24	223.5	178.167	17	52	-59.3333	-7	6.032	-6.88267	-3.5	9.79827
223	01:14:00	167.5	242.167	23	223.5	178.167	18	56	-64	-5	6.496	-7.424	-2.5	10.1766
224	01:14:20	166.167	230.833	23	226.167	176.167	15	60	-54.6667	-8	6.96	-6.34133	-4	10.2301
225	01:14:40	176.167	228.833	22	224.167	178.167	16	48	-50.6667	-6	5.568	-5.87733	-3	8.63398
226	01:15:00	163.5	229.5	23	224.167	180.167	15	60.6667	-49.3333	-8	7.03733	-5.72267	-4	9.91327
227	01:15:20	169.5	232.833	23	224.167	180.167	16	54.6667	-52.6667	-7	6.34133	-6.10933	-3.5	9.47557
228	01:15:40	174.833	229.5	23	224.167	177.5	14	49.3333	-52	-9	5.72267	-6.032	-4.5	9.45431
229	01:16:00	175.5	240.167	23	224.167	178.167	15	48.6667	-62	-8	5.64533	-7.192	-4	9.97971
230	01:16:20	174.167	229.5	22	225.5	176.167	13	51.3333	-53.3333	-9	5.95467	-6.18667	-4.5	9.69448
231	01:16:40	170.833	226.167	20	226.833	177.5	13	56	-48.6667	-7	6.496	-5.64533	-3.5	9.29074
232	01:17:00	170.833	236.833	21	228.167	177.5	14	57.3333	-59.3333	-7	6.65067	-6.88267	-3.5	10.1908
233	01:17:20	173.5	233.5	21	228.167	177.5	13	54.6667	-56	-8	6.34133	-6.496	-4	9.92021
234	01:17:40	165.5	226.833	22	227.5	178.167	14	62	-48.6667	-8	7.192	-5.64533	-4	9.97971
235	01:18:00	170.167	228.167	21	227.5	176.167	14	57.3333	-52	-7	6.65067	-6.032	-3.5	9.63672
236	01:18:20	166.833	224.167	22	228.833	176.167	15	62	-48	-7	7.192	-5.568	-3.5	9.74564
237	01:18:40	164.167	223.5	21	230.833	174.833	13	66.6667	-48.6667	-8	7.73333	-5.64533	-4	10.3766
238	01:19:00	165.5	214.167	20	228.833	176.167	14	63.3333	-38	-6	7.34667	-4.408	-3	9.07766
239	01:19:20	170.833	213.5	19	228.833	176.167	13	58	-37.3333	-6	6.728	-4.33067	-3	8.54521
240	01:19:40	166.167	216.833	20	228.833	176.167	13	62.6667	-40.6667	-7	7.26933	-4.71733	-3.5	9.34593
241	01:20:00	168.167	223.5	20	226.833	176.833	12	58.6667	-46.6667	-8	6.80533	-5.41333	-4	9.57166
242	01:20:20	159.5	220.833	20	231.5	177.5	13	72	-43.3333	-7	8.352	-5.02667	-3.5	10.3573
243	01:20:40	169.5	230.167	20	231.5	174.167	13	62	-56	-7	7.192	-6.496	-3.5	10.304
244	01:21:00	169.5	217.5	20	233.5	175.5	14	64	-42	-6	7.424	-4.872	-3	9.37295
245	01:21:20	174.833	223.5	19	234.833	172.833	13	60	-50.6667	-6	6.96	-5.87733	-3	9.59086
246	01:21:40	178.833	214.833	19	232.167	173.5	13	53.3333	-41.3333	-6	6.18667	-4.79467	-3	8.38234
247	01:22:00	170.833	213.5	19	232.167	173.5	14	61.3333	-40	-5	7.11467	-4.64	-2.5	8.85427
248	01:22:20	172.167	214.167	20	234.833	174.167	14	62.6667	-40	-6	7.26933	-4.64	-3	9.13087
249	01:22:40	179.5	218.167	19	234.833	174.167	14	55.3333	-44	-5	6.41867	-5.104	-2.5	8.57322
250	01:23:00	180.167	213.5	18	234.833	174.167	13	54.6667	-39.3333	-5	6.34133	-4.56267	-2.5	8.20247
251	01:23:20	183.5	216.167	19	232.167	174.833	14	48.6667	-41.3333	-5	5.64533	-4.79467	-2.5	7.8172
252	01:23:40	184.167	202.833	16	232.833	174.167	15	48.6667	-28.6667	-1	5.64533	-3.32533	-0.5	6.57097
253	01:24:00	185.5	192.167	13	234.167	175.5	15	48.6667	-16.6667	2	5.64533	-1.93333	1	6.05042
254	01:24:20	186.833	183.5	14	233.5	173.5	13	46.6667	-10	-1	5.41333	-1.16	-0.5	5.55876
255	01:24:40	186.833	188.167	15	232.167	172.833	14	45.3333	-15.3333	-1	5.25867	-1.77867	-0.5	5.5738
256	01:25:00	184.167	192.833	15	230.833	172.833	12	46.6667	-20	-3	5.41333	-2.32	-1.5	6.07755
257	01:25:20	182.833	197.5	16	228.167	174.167	13	45.3333	-23.3333	-3	5.25867	-2.70667	-1.5	6.10161
258	01:25:40	180.167	197.5	16	227.5	173.5	15	47.3333	-24	-1	5.49067	-2.784	-0.5	6.17641
259	01:26:00	177.5	220.833	19	228.167	173.5	15	50.6667	-47.3333	-4	5.87733	-5.49067	-2	8.28797
260	01:26:20	180.833	192.833	17	228.167	179.5	15	47.3333	-13.3333	-2	5.49067	-1.54667	-1	5.79134
261	01:26:40	199.5	151.5	20	226.833	182.833	15	27.3333	31.3333	-5	3.17067	3.63467	-2.5	5.43267
262	01:27:00	202.833	144.167	18	222.167	184.833	15	19.3333	40.6667	-3	2.24267	4.71733	-1.5	5.43441
263	01:27:20	205.5	139.5	18	219.5	186.167	15	14	46.6667	-3	1.624	5.41333	-1.5	5.84735	1
264	01:27:40	198.167	144.833	18	218.167	188.167	15	20	43.3333	-3	2.32	5.02667	-1.5	5.73583
265	01:28:00	188.833	155.5	17	216.167	189.5	15	27.3333	34	-2	3.17067	3.944	-1	5.15832
266	01:28:20	181.5	162.167	17	213.5	190.167	15	32	28	-2	3.712	3.248	-1	5.03274
267	01:28:40	180.167	163.5	14	215.5	193.5	16	35.3333	30	2	4.09867	3.48	1	5.46895
268	01:29:00	177.5	176.833	13	215.5	193.5	19	38	16.6667	6	4.408	1.93333	3	5.67171
269	01:29:20	178.833	178.167	17	213.5	197.5	17	34.6667	19.3333	0	4.02133	2.24267	0	4.60442
270	01:29:40	174.167	184.833	19	211.5	200.167	16	37.3333	15.3333	-3	4.33067	1.77867	-1.5	4.91613
271	01:30:00	173.5	176.833	20	208.167	202.167	17	34.6667	25.3333	-3	4.02133	2.93867	-1.5	5.20162
272	01:30:20	185.5	165.5	20	212.833	206.833	16	27.3333	41.3333	-4	3.17067	4.79467	-2	6.08621
273	01:30:40	171.5	190.167	17	210.167	209.5	16	38.6667	19.3333	-1	4.48533	2.24267	-0.5	5.03962
274	01:31:00	165.5	212.167	21	211.5	209.5	15	46	-2.66667	-6	5.336	-0.309333	-3	6.12932
275	01:31:20	164.167	218.167	19	206.833	208.167	17	42.6667	-10	-2	4.94933	-1.16	-1	5.18088
276	01:31:40	170.833	203.5	19	212.167	209.5	17	41.3333	6	-2	4.79467	0.696	-1	4.94704
277	01:32:00	170.833	204.833	21	212.833	212.833	18	42	8	-3	4.872	0.928	-1.5	5.18146
278	01:32:20	170.833	208.167	22	212.833	212.833	19	42	4.66667	-3	4.872	0.541333	-1.5	5.12635
279	01:32:40	169.5	218.833	22	212.833	212.833	19	43.3333	-6	-3	5.02667	-0.696	-1.5	5.29167
280	01:33:00	162.833	232.167	22	213.5	214.167	18	50.6667	-18	-4	5.87733	-2.088	-2	6.55002
281	01:33:20	168.167	226.167	22	213.5	214.167	18	45.3333	-12	-4	5.25867	-1.392	-2	5.79579
282	01:33:40	176.167	207.5	22	213.5	214.167	17	37.3333	6.66667	-5	4.33067	0.773333	-2.5	5.05991
283	01:34:00	167.5	222.167	22	213.5	214.167	18	46	-8	-4	5.336	-0.928	-2	5.77357
284	01:34:20	165.5	228.167	23	212.167	216.833	19	46.6667	-11.3333	-4	5.41333	-1.31467	-2	5.91883
285	01:34:40	177.5	196.833	23	213.5	217.5	19	36	20.6667	-4	4.176	2.39733	-2	5.21404
286	01:35:00	182.833	182.833	24	213.5	217.5	19	30.6667	34.6667	-5	3.55733	4.02133	-2.5	5.92248
287	01:35:20	175.5	202.167	24	212.833	217.5	19	37.3333	15.3333	-5	4.33067	1.77867	-2.5	5.30738
288	01:35:40	170.833	207.5	24	214.167	217.5	19	43.3333	10	-5	5.02667	1.16	-2.5	5.73262
289	01:36:00	170.167	216.167	24	212.167	220.167	19	42	4	-5	4.872	0.464	-2.5	5.49561
290	01:36:20	176.167	199.5	24	209.5	219.5	19	33.3333	20	-5	3.86667	2.32	-2.5	5.15592
291	01:36:40	174.833	206.833	25	214.167	221.5	19	39.3333	14.6667	-6	4.56267	1.70133	-3	5.71948
292	01:37:00	170.833	216.167	25	210.833	222.833	19	40	6.66667	-6	4.64	0.773333	-3	5.57922
293	01:37:20	164.167	237.5	24	212.833	220.167	19	48.6667	-17.3333	-5	5.64533	-2.01067	-2.5	6.49327
294	01:37:40	161.5	250.167	25	208.833	216.833	18	47.3333	-33.3333	-7	5.49067	-3.86667	-3.5	7.57288
295	01:38:00	163.5	252.833	25	206.833	214.167	18	43.3333	-38.6667	-7	5.02667	-4.48533	-3.5	7.59181
296	01:38:20	160.833	252.833	24	204.167	216.167	19	43.3333	-36.6667	-5	5.02667	-4.25333	-2.5	7.04331
297	01:38:40	163.5	234.167	25	208.167	217.5	20	44.6667	-16.6667	-5	5.18133	-1.93333	-2.5	6.0691
298	01:39:00	165.5	222.167	26	209.5	215.5	21	44	-6.66667	-5	5.104	-0.773333	-2.5	5.73575
299	01:39:20	172.167	208.167	24	209.5	210.833	20	37.3333	2.66667	-4	4.33067	0.309333	-2	4.78021
300	01:39:40	169.5	211.5	24	211.5	212.167	19	42	0.666667	-5	4.872	0.0773333	-2.5	5.47653
301	01:40:00	170.167	212.167	24	213.5	212.833	19	43.3333	0.666667	-5	5.02667	0.0773333	-2.5	5.61457
302	01:40:20	174.833	201.5	24	212.833	212.833	20	38	11.3333	-4	4.408	1.31467	-2	5.01586
303	01:40:40	171.5	218.167	25	211.5	213.5	20	40	-4.66667	-5	4.64	-0.541333	-2.5	5.29836
304	01:41:00	168.167	226.167	25	213.5	215.5	20	45.3333	-10.6667	-5	5.25867	-1.23733	-2.5	5.95269
305	01:41:20	170.167	224.833	25	216.167	215.5	20	46	-9.33333	-5	5.336	-1.08267	-2.5	5.99125
306	01:41:40	170.833	230.833	24	214.167	212.833	19	43.3333	-18	-5	5.02667	-2.088	-2.5	5.98975
307	01:42:00	170.167	246.167	24	211.5	215.5	18	41.3333	-30.6667	-6	4.79467	-3.55733	-3	6.68158
308	01:42:20	170.167	238.167	22	212.167	212.833	18	42	-25.3333	-4	4.872	-2.93867	-2	6.03093
309	01:42:40	171.5	210.167	23	210.167	212.167	18	38.6667	2	-5	4.48533	0.232	-2.5	5.14024
310	01:43:00	170.167	211.5	23	212.167	214.167	19	42	2.66667	-4	4.872	0.309333	-2	5.27561
311	01:43:20	172.833	197.5	23	209.601	210.106	18	36.7677	12.6061	-5	4.26505	1.4623	-2.5	5.15548
312	01:43:40	175.5	192.833	24	210.106	210.106	19	34.6061	17.2727	-5	4.0143	2.00364	-2.5	5.13607
313	01:44:00	165.5	202.167	23	212.126	214.146	21	46.6263	11.9798	-2	5.40865	1.38966	-1	5.67315
314	01:44:20	178.167	211.5	24	213.641	215.157	20	35.4747	3.65657	-4	4.11507	0.424162	-2	4.59497
315	01:44:40	178.167	198.833	24	214.652	212.631	20	36.4848	13.798	-4	4.23224	1.60057	-2	4.94709
316	01:45:00	178.167	196.833	24	213.641	214.146	20	35.4747	17.3131	-4	4.11507	2.00832	-2	4.99672
317	01:45:20	174.167	202.167	25	214.146	215.157	21	39.9798	12.9899	-4	4.63766	1.50683	-2	5.27052
318	01:45:40	174.167	202.167	24	216.672	215.157	21	42.5051	12.9899	-3	4.93059	1.50683	-1.5	5.36947
319	01:46:00	176.167	191.5	25	216.672	219.197	19	40.5051	27.697	-6	4.69859	3.21285	-3	6.43421
320	01:46:20	186.167	195.5	28	215.662	219.197	19	29.4949	23.697	-9	3.42141	2.74885	-4.5	6.28588
321	01:46:40	197.5	194.167	29	215.662	216.167	19	18.1616	22	-10	2.10675	2.552	-5	5.99592
322	01:47:00	192.833	199.5	29	212.631	217.682	20	19.798	18.1818	-9	2.29657	2.10909	-4.5	5.47471
323	01:47:20	184.833	204.833	30	212.631	217.682	21	27.798	12.8485	-9	3.22457	1.49042	-4.5	5.73317
324	01:47:40	200.833	216.833	32	212.631	215.662	21	11.798	-1.17172	-11	1.36857	-0.135919	-5.5	5.66934
325	01:48:00	203.5	224.833	32	209.096	212.631	21	5.59596	-12.202	-11	0.649131	-1.41543	-5.5	5.71619
326	01:48:20	208.167	215.5	33	206.571	211.116	22	-1.59596	-4.38384	-11	-0.185131	-0.508525	-5.5	5.52656
327	01:48:40	214.167	228.833	33	206.571	214.652	23	-7.59596	-14.1818	-10	-0.881131	-1.64509	-5	5.33692	1
328	01:49:00	204.167	219.5	33	210.611	214.652	21	6.44444	-4.84848	-12	0.747556	-0.562424	-6	6.07249
329	01:49:20	190.833	211.5	32	211.621	218.187	22	20.7879	6.68687	-10	2.41139	0.775677	-5	5.60504
330	01:49:40	190.833	211.5	30	213.136	215.157	21	22.303	3.65657	-9	2.58715	0.424162	-4.5	5.208
331	01:50:00	182.833	208.167	29	212.631	212.631	21	29.798	4.46465	-8	3.45657	0.517899	-4	5.31188
332	01:50:20	179.5	206.167	28	214.652	210.611	20	35.1515	4.44444	-8	4.07758	0.515556	-4	5.73519	1
333	01:50:40	176.833	206.167	26	211.116	211.116	21	34.2828	4.94949	-5	3.97681	0.574141	-2.5	4.7323
334	01:51:00	168.833	206.167	28	209.601	211.116	21	40.7677	4.94949	-7	4.72905	0.574141	-3.5	5.91131
335	01:51:20	160.167	198.167	24	208.591	208.591	21	48.4242	10.4242	-3	5.61721	1.20921	-1.5	5.93846
336	01:51:40	158.833	195.5	24	211.116	206.066	21	52.2828	10.5657	-3	6.06481	1.22562	-1.5	6.36663
337	01:52:00	157.5	195.5	24	214.146	207.076	21	56.6465	11.5758	-3	6.57099	1.34279	-1.5	6.87248
338	01:52:20	165.5	192.167	25	214.146	207.076	20	48.6465	14.9091	-5	5.64299	1.72945	-2.5	6.40971
339	01:52:40	161.5	188.833	26	215.157	205.056	20	53.6566	16.2222	-6	6.22416	1.88178	-3	7.16109
340	01:53:00	156.167	183.5	24	215.157	202.53	20	58.9899	19.0303	-4	6.84283	2.20752	-2	7.46307
341	01:53:20	152.167	184.167	25	216.167	201.015	20	64	16.8485	-5	7.424	1.95442	-2.5	8.07376
342	01:53:40	152.167	187.5	26	215.662	202.53	20	63.4949	15.0303	-6	7.36541	1.74352	-3	8.14182
343	01:54:00	149.5	178.167	26	216.672	205.561	19	67.1717	27.3939	-7	7.79192	3.1777	-3.5	9.11382
344	01:54:20	158.833	198.167	26	215.157	204.045	19	56.3232	5.87879	-7	6.53349	0.681939	-3.5	7.44322
345	01:54:40	173.5	201.5	26	214.146	201.015	19	40.6465	-0.484848	-7	4.71499	-0.0562424	-3.5	5.87233
346	01:55:00	180.167	202.833	28	216.167	201.015	18	36	-1.81818	-10	4.176	-0.210909	-5	6.51793
347	01:55:20	184.833	204.833	28	217.177	201.015	19	32.3434	-3.81818	-9	3.75184	-0.442909	-4.5	5.87558
348	01:55:40	181.5	211.5	27	218.692	201.015	20	37.1919	-10.4848	-7	4.31426	-1.21624	-3.5	5.68701
349	01:56:00	192.167	204.833	29	217.177	196.47	21	25.0101	-8.36364	-8	2.90117	-0.970182	-4	5.03568
350	01:56:20	188.167	206.167	28	218.187	198.49	19	30.0202	-7.67677	-9	3.48234	-0.890505	-4.5	5.75932
351	01:56:40	182.167	207.5	27	218.187	196.47	18	36.0202	-11.0303	-9	4.17834	-1.27952	-4.5	6.27262
352	01:57:00	182.833	210.167	27	217.177	196.975	17	34.3434	-13.1919	-10	3.98384	-1.53026	-5	6.57363	1
353	01:57:20	178.167	206.167	25	216.167	198.995	19	38	-7.17172	-6	4.408	-0.831919	-3	5.39653
354	01:57:40	176.167	209.5	25	213.641	194.449	18	37.4747	-15.0505	-7	4.34707	-1.74586	-3.5	5.84765
355	01:58:00	182.833	204.833	26	215.662	196.47	19	32.8283	-8.36364	-7	3.80808	-0.970182	-3.5	5.26239
356	01:58:20	182.833	208.167	27	214.652	196.47	20	31.8182	-11.697	-7	3.69091	-1.35685	-3.5	5.26439
357	01:58:40	180.167	203.5	27	211.621	195.965	20	31.4545	-7.53535	-7	3.64873	-0.874101	-3.5	5.13101
358	01:59:00	177.5	192.833	28	213.136	196.975	20	35.6364	4.14141	-8	4.13382	0.480404	-4	5.77228
359	01:59:20	170.833	185.5	26	217.682	192.934	20	46.8485	7.43434	-6	5.43442	0.862384	-3	6.26711
360	01:59:40	176.167	188.167	25	218.692	194.449	20	42.5253	6.28283	-5	4.93293	0.728808	-2.5	5.57808
361	02:00:00	176.833	197.5	27	222.732	196.47	20	45.899	-1.0303	-7	5.32428	-0.119515	-3.5	6.37278
362	02:00:20	189.5	195.5	27	220.207	194.955	19	30.7071	-0.545455	-8	3.56202	-0.0632727	-4	5.35649
363	02:00:40	183.5	192.833	27	219.197	196.975	20	35.697	4.14141	-7	4.14085	0.480404	-3.5	5.44311
364	02:01:00	186.833	191.5	25	222.227	196.975	20	35.3939	5.47475	-5	4.1057	0.635071	-2.5	4.84872
365	02:01:20	190.833	197.5	26	225.258	194.449	20	34.4242	-3.05051	-6	3.99321	-0.353859	-3	5.00709
366	02:01:40	188.167	203.5	27	221.722	194.955	19	33.5556	-8.54545	-8	3.89244	-0.991273	-4	5.66866
367	02:02:00	195.5	203.5	25	222.732	194.449	19	27.2323	-9.05051	-6	3.15895	-1.04986	-3	4.4812
368	02:02:20	198.167	205.5	23	222.227	193.944	18	24.0606	-11.5556	-5	2.79103	-1.34044	-2.5	3.97953
369	02:02:40	188.833	203.5	25	219.702	193.439	19	30.8687	-10.0606	-6	3.58077	-1.16703	-3	4.81496
370	02:03:00	188.167	203.5	27	219.702	193.944	19	31.5354	-9.55556	-8	3.6581	-1.10844	-4	5.53266
371	02:03:20	192.167	203.5	27	221.722	195.965	18	29.5556	-7.53535	-9	3.42844	-0.874101	-4.5	5.72436
372	02:03:40	185.5	204.833	25	221.217	192.934	18	35.7172	-11.899	-7	4.14319	-1.38028	-3.5	5.59654
373	02:04:00	174.833	198.167	24	219.702	189.904	19	44.8687	-8.26263	-5	5.20477	-0.958465	-2.5	5.85306
374	02:04:20	186.833	203.5	26	214.146	192.429	18	27.3131	-11.0707	-8	3.16832	-1.2842	-4	5.26189
375	02:04:40	185.5	198.167	26	219.197	189.399	19	33.697	-8.76768	-7	3.90885	-1.01705	-3.5	5.34448
376	02:05:00	189.5	198.167	26	216.167	189.904	18	26.6667	-8.26263	-8	3.09333	-0.958465	-4	5.14659
377	02:05:20	188.167	201.5	26	216.167	187.884	19	28	-13.6162	-7	3.248	-1.57947	-3.5	5.02934
378	02:05:40	188.167	199.5	27	216.167	187.884	19	28	-11.6162	-8	3.248	-1.34747	-4	5.3259
379	02:06:00	181.5	196.833	26	219.197	185.864	18	37.697	-10.9697	-8	4.37285	-1.27248	-4	6.06144
380	02:06:20	188.833	199.5	25	215.157	187.884	17	26.3232	-11.6162	-8	3.05349	-1.34747	-4	5.20956
381	02:06:40	188.833	196.833	26	210.611	186.874	17	21.7778	-9.9596	-9	2.52622	-1.15531	-4.5	5.28834
382	02:07:00	185.5	195.5	25	213.641	187.379	17	28.1414	-8.12121	-8	3.2644	-0.942061	-4	5.24822
383	02:07:20	178.833	201.5	26	212.126	187.884	18	33.2929	-13.6162	-8	3.86198	-1.57947	-4	5.78011
384	02:07:40	181.5	200.833	25	212.631	185.864	17	31.1313	-14.9697	-8	3.61123	-1.73648	-4	5.66184
385	02:08:00	180.167	198.167	26	213.136	184.348	17	32.9697	-13.8182	-9	3.82448	-1.60291	-4.5	6.11931
386	02:08:20	177.5	196.833	26	213.641	185.864	18	36.1414	-10.9697	-8	4.1924	-1.27248	-4	5.93258
387	02:08:40	178.833	198.833	26	212.126	184.854	18	33.2929	-13.9798	-8	3.86198	-1.62166	-4	5.79178
388	02:09:00	180.833	202.833	26	213.136	183.338	16	32.303	-19.4949	-10	3.74715	-2.26141	-5	6.64493
389	02:09:20	179.5	202.833	26	214.146	183.338	16	34.6465	-19.4949	-10	4.01899	-2.26141	-5	6.80193
390	02:09:40	178.833	202.167	25	213.136	182.833	17	34.303	-19.3333	-8	3.97915	-2.24267	-4	6.07151
391	02:10:00	177.5	199.5	25	210.106	180.813	17	32.6061	-18.6869	-8	3.7823	-2.16768	-4	5.91647
392	02:10:20	174.833	204.833	24	210.106	182.833	16	35.2727	-22	-8	4.09164	-2.552	-4	6.26532
393	02:10:40	172.167	200.833	25	209.096	180.308	16	36.9293	-20.5253	-9	4.2838	-2.38093	-4.5	6.65355
394	02:11:00	172.167	198.833	26	207.581	181.823	17	35.4141	-17.0101	-9	4.10804	-1.97317	-4.5	6.40464
395	02:11:20	171.5	198.167	25	206.571	180.813	15	35.0707	-17.3535	-10	4.0682	-2.01301	-5	6.75296
396	02:11:40	173.5	200.167	26	208.591	180.813	15	35.0909	-19.3535	-11	4.07055	-2.24501	-5.5	7.20135
397	02:12:00	177.5	200.833	26	209.096	179.298	14	31.596	-21.5354	-12	3.66513	-2.4981	-6	7.46148
398	02:12:20	176.167	196.833	26	204.551	179.298	14	28.3838	-17.5354	-12	3.29253	-2.0341	-6	7.13991
399	02:12:40	182.833	196.833	27	202.53	180.813	14	19.697	-16.0202	-13	2.28485	-1.85834	-6.5	7.1361
400	02:13:00	178.833	198.167	28	201.52	180.308	15	22.6869	-17.8586	-13	2.63168	-2.0716	-6.5	7.31213
401	02:13:20	180.167	200.833	24	200.51	181.318	15	20.3434	-19.5152	-9	2.35984	-2.26376	-4.5	5.56268
402	02:13:40	176.833	200.833	23	200.51	182.328	14	23.6768	-18.5051	-9	2.74651	-2.14659	-4.5	5.6922
403	02:14:00	182.833	198.167	23	197.985	182.833	15	15.1515	-15.3333	-8	1.75758	-1.77867	-4	4.71728
404	02:14:20	180.167	208.833	22	202.025	180.813	14	21.8586	-28.0202	-8	2.5356	-3.25034	-4	5.74404
405		177.5	193.5	24

## Sheet: Phagosome tracks
		Cell body			Track 1			Track 2			Track 3			Track 4			Track 5			Track 6			Track 7			Track 8			Track 9			Track 10
	Time	X2	Y2	Z2	X	Y	Z	X	Y	Z	X	Y	Z	X	Y	Z	X	Y	Z	X	Y	Z	X	Y	Z	X	Y	Z
1	00:00:00	220.833	161.5	25	173.5	264	15
2	00:00:20	224.167	175.5	25	174.5	275	17
3	00:00:40	223.5	178.833	29	173	281.5	18
4	00:01:00	220.833	178.833	28	178.5	278.5	20
5	00:01:20	223.5	176.833	29	182.5	272	19
6	00:01:40	222.833	174.167	29	183	271	19
7	00:02:00	228.167	174.167	29	184	272	21
8	00:02:20	225.5	174.167	28	183	272	20
9	00:02:40	224.833	173.5	28	184.5	273	19
10	00:03:00	225.5	176.167	28	185	274	19
11	00:03:20	225.5	177.5	29	185	274	20
12	00:03:40	224.833	178.167	29	185	273	19
13	00:04:00	223.5	178.833	28	187	276.5	19
14	00:04:20	224.833	181.5	27	185	280	18
15	00:04:40	222.833	182.167	27	184	282	18
16	00:05:00	222.833	184.167	27	183	283	19
17	00:05:20	219.5	183.5	26	184	283.5	18
18	00:05:40	216.833	184.833	26	182.5	284.5	18
19	00:06:00	218.167	185.5	26	183	287	18
20	00:06:20	214.833	186.833	27	180.5	289	18
21	00:06:40	215.5	188.833	26	181	291.5	19
22	00:07:00	212.167	191.5	25	182	289	17
23	00:07:20	212.167	188.833	26	182	289	17
24	00:07:40	214.833	190.833	26	182	288	17
25	00:08:00	214.167	191.5	25	179.5	287.5	18
26	00:08:20	212.833	194.167	26	180	289	17
27	00:08:40	208.833	193.5	25	182.5	286	16
28	00:09:00	209.5	194.833	25	182.5	287	17
29	00:09:20	208.833	194.833	25	181	289	17
30	00:09:40	208.167	194.833	25	183	291	17
31	00:10:00	207.5	197.5	26	178	289.5	16
32	00:10:20	208.167	197.5	25	175	291	17
33	00:10:40	208.167	194.167	26	173	288.5	16
34	00:11:00	206.833	196.833	26
35	00:11:20	204.167	198.167	26
36	00:11:40	204.167	196.167	25
37	00:12:00	203.5	200.167	24
38	00:12:20	202.167	203.5	25
39	00:12:40	199.5	200.167	23
40	00:13:00	196.167	200.833	23
41	00:13:20	196.167	200.833	22
42	00:13:40	193.5	201.5	21
43	00:14:00	186.167	206.833	19
44	00:14:20	188.833	206.167	19				2	311	7
45	00:14:40	188.833	203.5	19				2.5	311	8
46	00:15:00	192.167	203.5	22				7.5	306	8
47	00:15:20	192.167	204.833	22				11	307.5	8
48	00:15:40	192.833	202.833	21				13.5	308	10
49	00:16:00	195.5	198.833	22				18.5	303.5	10
50	00:16:20	194.833	201.5	21				25	301.5	9
51	00:16:40	194.167	201.5	22				25.5	301	9
52	00:17:00	193.5	202.167	22				27	296	8
53	00:17:20	192.833	203.5	22				29	290.5	9
54	00:17:40	196.167	203.5	22				36.5	287	10
55	00:18:00	197.5	200.833	22				39	284	10
56	00:18:20	200.167	203.5	22				40	282.5	9
57	00:18:40	199.5	201.5	22				47	279.5	10
58	00:19:00	199.5	201.5	22				49.5	275	9
59	00:19:20	198.167	201.5	23				51.5	277	10
60	00:19:40	200.167	202.833	23				49.5	277.5	10
61	00:20:00	198.167	200.833	23				51	277.5	10
62	00:20:20	200.167	200.833	23				52	277	11
63	00:20:40	200.167	200.833	23				52	278	11
64	00:21:00	200.167	198.833	23				53.5	276	10
65	00:21:20	202.167	196.833	23				54	275.5	11
66	00:21:40	197.5	197.5	22				57	276.5	10
67	00:22:00	198.833	198.833	22				57.5	273	10
68	00:22:20	196.833	199.5	23				58	273.5	10
69	00:22:40	196.833	198.833	22				57	276	11
70	00:23:00	198.833	201.5	23				56	276	10
71	00:23:20	197.5	198.167	22				57	279	11
72	00:23:40	197.5	198.167	22				57	279	10
73	00:24:00	197.5	200.833	24				56	278	11
74	00:24:20	198.167	198.833	23				56.5	276.5	11
75	00:24:40	197.5	198.167	22				59.5	273.5	10
76	00:25:00	196.167	200.833	23				61	272	10
77	00:25:20	196.167	200.833	23				59	275	9
78	00:25:40	196.167	200.833	22				55	275.5	10
79	00:26:00	198.833	199.5	23				54.5	278.5	10
80	00:26:20	199.5	197.5	22				58.5	279	10
81	00:26:40	198.833	198.167	23				58.5	277.5	10
82	00:27:00	198.167	202.167	24				57	279	10
83	00:27:20	198.167	198.833	23				61	279	10
84	00:27:40	197.5	201.5	23				68.5	281	10
85	00:28:00	195.5	202.833	23				67.5	278.5	10
86	00:28:20	196.833	204.167	23				67	275.5	10
87	00:28:40	191.5	207.5	22				71	276.5	10
88	00:29:00	192.833	205.5	22				72	273	10
89	00:29:20	192.833	204.167	23				74.5	272	10
90	00:29:40	196.167	206.167	23				74	268.5	10
91	00:30:00	198.167	208.167	23				75	265.5	10
92	00:30:20	195.5	206.833	23				77	265	10
93	00:30:40	196.167	204.833	22				78.5	265	10
94	00:31:00	197.5	207.5	22				81	263	11
95	00:31:20	197.5	208.167	23				88.5	261.5	10
96	00:31:40	197.5	207.5	22				91	261.5	12	201.5	335.5	40
97	00:32:00	196.833	206.833	23				95	258.5	11	208.167	328.167	40
98	00:32:20	196.833	210.833	21				101	251.5	12	210.833	328.833	40
99	00:32:40	200.833	209.5	25				135.5	229	15	213.5	326.167	39
100	00:33:00	200.833	209.5	24				145	225	16	214.833	326.167	38
101	00:33:20	201.5	209.5	24				149	221	16	213.5	324.167	39
102	00:33:40	204.833	206.167	24				149	219	16	212.167	322.167	39
103	00:34:00	203.5	207.5	24				153	219	16	213.5	319.5	37
104	00:34:20	203.5	212.833	26				157	217	19	212.833	314.833	39
105	00:34:40	207.5	212.833	26				160.5	215.5	19	216.167	311.5	37
106	00:35:00	208.833	214.833	25				161	212.5	18	216.167	314.167	37
107	00:35:20	206.833	212.167	26				161.5	210	18	221.5	308.833	36
108	00:35:40	206.833	212.167	25				164	210	18	219.5	307.5	34
109	00:36:00	206.833	208.167	25				165.5	213	19	223.5	308.833	33
110	00:36:20	208.167	211.5	25				162.5	211.5	19	222.833	308.833	32
111	00:36:40	208.167	208.167	25				162	209	18	223.5	306.833	32
112	00:37:00	209.5	208.167	24				161	210	18	223.5	312.833	33
113	00:37:20	212.167	210.833	24				163	211.5	18	221.5	313.5	32
114	00:37:40	210.833	209.5	25				163.5	213	18	222.833	315.5	32
115	00:38:00	206.833	208.167	25				163	212.5	18	222.167	318.167	32
116	00:38:20	208.833	208.167	24				161	210	18	220.833	318.167	32
117	00:38:40	207.5	207.5	25				161	212	16	219.5	319.5	32
118	00:39:00	207.5	207.5	25				160.5	210	17	216.167	319.5	32
119	00:39:20	206.167	206.833	25				159	209	17	217.5	316.833	31
120	00:39:40	204.167	207.5	25				161.5	209	16	217.5	316.833	30
121	00:40:00	203.5	208.167	24				159.5	207	16	216.167	312.167	29
122	00:40:20	202.833	207.5	25				158	209	17	216.167	314.167	29
123	00:40:40	201.5	209.5	25				157	214.5	15	210.833	311.5	29
124	00:41:00	202.167	206.833	24				160	214.5	16	212.167	309.5	28
125	00:41:20	202.167	210.167	24				160	212	18	211.5	304.833	28
126	00:41:40	201.5	206.833	24				157.5	211	16	208.833	290.833	27
127	00:42:00	203.5	207.5	24				160	208	16	206.833	279.5	26
128	00:42:20	200.833	202.167	24							204.167	273.5	26
129	00:42:40	198.833	206.167	23							202.833	271.5	26
130	00:43:00	200.833	206.833	24							201.5	270.167	26
131	00:43:20	201.5	206.833	24							201.5	270.167	25
132	00:43:40	200.833	207.5	23							201.5	268.833	25
133	00:44:00	202.167	204.833	24							201.5	270.833	25
134	00:44:20	199.5	204.833	23							194.833	265.5	25
135	00:44:40	197.5	203.5	23							194.833	264.167	25
136	00:45:00	197.5	203.5	24							188.833	262.167	25
137	00:45:20	201.5	204.833	24							191.5	258.167	25
138	00:45:40	198.833	199.5	24							193.5	259.5	25
139	00:46:00	200.167	204.833	24							189.5	256.167	25
140	00:46:20	197.5	208.833	24							190.833	259.5	25
141	00:46:40	193.5	204.833	24							188.167	259.5	25
142	00:47:00	188.167	204.833	23							188.167	253.5	25
143	00:47:20	185.5	202.833	22							194.167	247.5	25
144	00:47:40	188.167	202.833	22							194.833	242.833	24
145	00:48:00	186.167	203.5	22							198.833	243.5	23	0.833333	226.833	21
146	00:48:20	190.167	204.167	22							195.5	241.5	23	1.5	226.833	21
147	00:48:40	192.167	204.833	22							196.833	242.167	23	5.5	226.167	21
148	00:49:00	193.5	205.5	22							196.167	241.5	23	4.16667	223.5	21
149	00:49:20	196.167	202.833	22							198.833	242.167	23	8.16667	225.5	21
150	00:49:40	196.833	204.833	23							198.833	240.833	23	8.83333	224.833	21
151	00:50:00	198.167	205.5	22							198.833	242.833	23	3.5	224.833	21
152	00:50:20	197.5	205.5	22							199.5	240.833	24	5.5	228.167	21
153	00:50:40	196.833	204.833	23							200.167	245.5	24	8.16667	230.167	20
154	00:51:00	197.5	206.833	23							200.833	242.167	26	7.5	228.833	20
155	00:51:20	198.167	207.5	22							204.833	242.167	25	4.83333	230.167	20
156	00:51:40	198.167	210.167	24							202.167	246.833	26	4.83333	231.5	21
157	00:52:00	196.833	207.5	23							202.833	250.167	26	2.83333	231.5	20
158	00:52:20	196.167	206.167	22							198.833	249.5	26	2.16667	232.167	20
159	00:52:40	198.167	205.5	22							201.5	241.5	24	4.16667	228.833	19
160	00:53:00	196.167	210.167	24							202.833	247.5	25	4.83333	232.167	19
161	00:53:20	195.5	208.167	23							202.833	248.833	26	0.833333	235.5	19
162	00:53:40	194.167	210.833	24										1.5	235.5	19
163	00:54:00	194.167	210.833	23										1.5	235.5	18
164	00:54:20	196.833	216.167	23										0.833333	237.5	18
165	00:54:40	196.167	212.167	24										0.166667	239.5	18
166	00:55:00	194.833	214.167	24										0	237.5	18
167	00:55:20	196.167	210.167	23										2.16667	239.5	18
168	00:55:40	196.833	210.833	23										2.83333	236.833	18
169	00:56:00	196.833	210.833	24										2.83333	235.5	17
170	00:56:20	196.167	210.833	23										2.16667	236.167	17
171	00:56:40	196.167	210.833	23										5.5	238.167	16
172	00:57:00	194.833	213.5	23										10.8333	237.5	16
173	00:57:20	192.833	214.167	23										10.8333	238.833	16
174	00:57:40	193.5	209.5	23										13.5	236.833	16
175	00:58:00	198.167	209.5	22										34.1667	232.167	14
176	00:58:20	194.833	208.167	23										40.1667	231.5	14
177	00:58:40	194.833	208.167	23										48.1667	230.167	13
178	00:59:00	196.833	204.167	23										65.5	228.833	13
179	00:59:20	198.833	208.167	24										73.5	224.833	13
180	00:59:40	200.833	206.833	23										88.8333	222.167	14
181	01:00:00	201.5	205.5	23										138.167	214.167	15
182	01:00:20	202.833	205.5	23										151.5	203.5	15
183	01:00:40	204.167	208.833	23										155.5	204.167	15
184	01:01:00	207.5	207.5	23										156.833	207.5	15	152.167	264.833	36
185	01:01:20	208.167	204.833	24										162.167	203.5	14	156.167	260.833	38
186	01:01:40	208.167	205.5	23										163.5	200.833	15	161.5	252.833	37
187	01:02:00	208.167	205.5	24										164.833	200.833	15	164.833	256.167	36
188	01:02:20	208.167	204.167	23										165.5	198.167	15	168.833	251.5	37
189	01:02:40	210.167	204.833	24										164.833	197.5	15	173.5	246.167	36
190	01:03:00	210.167	204.833	23										170.833	204.167	14	179.5	244.833	36
191	01:03:20	212.167	202.833	22										166.833	201.5	16	179.5	246.167	36
192	01:03:40	212.167	203.5	23										170.833	200.833	16	176.167	246.833	36
193	01:04:00	214.167	203.5	23										170.833	202.167	15	178.833	242.167	34
194	01:04:20	214.167	201.5	22										170.833	201.5	15	181.5	242.833	36
195	01:04:40	214.167	201.5	23										170.167	202.833	16	180.167	242.167	36
196	01:05:00	214.833	197.5	22										173.5	202.167	15	178.167	239.5	35
197	01:05:20	210.833	198.833	22										180.167	202.167	15	176.833	239.5	34
198	01:05:40	206.833	198.167	22													180.167	242.167	35
199	01:06:00	212.833	198.167	20													177.5	240.833	34
200	01:06:20	211.5	196.167	21													175.5	240.833	34
201	01:06:40	208.833	197.5	22													175.5	240.167	33
202	01:07:00	206.833	199.5	21													175.5	237.5	34
203	01:07:20	208.833	198.167	20													177.5	232.833	31
204	01:07:40	208.833	198.167	20													177.5	232.833	31
205	01:08:00	208.833	195.5	20													177.5	230.167	31
206	01:08:20	208.833	194.833	19													178.833	231.5	31
207	01:08:40	208.167	194.833	20													177.5	230.167	29
208	01:09:00	210.833	193.5	20													177.5	229.5	30
209	01:09:20	211.5	190.167	20													178.833	228.833	30
210	01:09:40	212.833	188.167	19													177.5	226.167	29
211	01:10:00	214.167	186.167	19													180.167	223.5	28
212	01:10:20	217.5	184.167	19													182.833	220.833	28
213	01:10:40	215.5	184.167	18													184.167	218.167	29
214	01:11:00	218.833	183.5	18													187.5	215.5	28
215	01:11:20	218.167	182.167	17													185.5	216.167	29
216	01:11:40	220.833	181.5	17													187.5	215.5	29	180.167	334.167	20
217	01:12:00	220.833	181.5	16													188.167	210.833	27	180.167	329.5	19
218	01:12:20	220.833	180.833	17													189.5	212.167	27	180.833	328.833	18
219	01:12:40	221.5	178.833	17													190.833	206.833	27	178.833	328.833	20
220	01:13:00	221.5	178.833	17													188.167	207.5	26	170.833	320.833	22
221	01:13:20	222.833	178.167	16													190.833	206.833	26	170.167	316.833	19
222	01:13:40	223.5	178.167	17													191.5	206.167	26	172.167	315.5	19
223	01:14:00	223.5	178.167	18													193.5	204.833	25	169.5	316.167	19
224	01:14:20	226.167	176.167	15													193.5	204.167	26	166.833	318.167	19
225	01:14:40	224.167	178.167	16													195.5	202.833	25	168.833	318.167	17
226	01:15:00	224.167	180.167	15													194.167	203.5	25	168.167	319.5	17
227	01:15:20	224.167	180.167	16													190.833	205.5	26	170.167	317.5	17
228	01:15:40	224.167	177.5	14													192.167	206.167	25	168.833	316.833	17
229	01:16:00	224.167	178.167	15													192.167	206.833	24	164.833	316.833	16
230	01:16:20	225.5	176.167	13													193.5	203.5	24	166.167	314.167	15
231	01:16:40	226.833	177.5	13													193.5	204.167	24	164.167	315.5	16
232	01:17:00	228.167	177.5	14													194.833	202.833	24	164.167	314.167	17
233	01:17:20	228.167	177.5	13													194.833	202.167	23	166.167	312.833	17
234	01:17:40	227.5	178.167	14													196.833	203.5	24	166.833	311.5	16
235	01:18:00	227.5	176.167	14													194.833	202.833	25	169.5	312.833	16
236	01:18:20	228.833	176.167	15													194.833	202.167	25	164.833	306.167	16
237	01:18:40	230.833	174.833	13													195.5	202.167	25	163.5	302.167	16
238	01:19:00	228.833	176.167	14													196.167	202.167	23	161.5	302.167	15
239	01:19:20	228.833	176.167	13													197.5	202.833	24	162.833	304.167	15
240	01:19:40	228.833	176.167	13													194.833	203.5	25	158.167	306.167	15
241	01:20:00	226.833	176.833	12													196.833	204.167	24	160.833	303.5	15
242	01:20:20	231.5	177.5	13													194.833	206.833	23	160.833	306.167	15
243	01:20:40	231.5	174.167	13													193.5	208.167	23	164.167	299.5	16
244	01:21:00	233.5	175.5	14													197.5	204.833	23	164.167	299.5	16
245	01:21:20	234.833	172.833	13													200.167	202.167	23	165.5	301.5	16
246	01:21:40	232.167	173.5	13													203.5	200.833	22	164.833	303.5	15
247	01:22:00	232.167	173.5	14													201.5	200.833	22	165.5	301.5	15
248	01:22:20	234.833	174.167	14													200.833	199.5	23	167.5	303.5	15
249	01:22:40	234.833	174.167	14													201.5	199.5	23	166.167	303.5	15
250	01:23:00	234.833	174.167	13													203.5	199.5	24	166.833	303.5	16
251	01:23:20	232.167	174.833	14													202.167	198.833	23	166.833	303.5	16
252	01:23:40	232.833	174.167	15													201.5	198.167	23	164.833	305.5	15
253	01:24:00	234.167	175.5	15													204.167	200.167	22	165.5	304.833	16
254	01:24:20	233.5	173.5	13													203.5	200.833	23	166.833	307.5	16
255	01:24:40	232.167	172.833	14													202.833	200.833	21	166.167	307.5	15
256	01:25:00	230.833	172.833	12													202.167	203.5	21	161.5	308.833	15
257	01:25:20	228.167	174.167	13													202.833	202.167	21	160.167	306.167	16
258	01:25:40	227.5	173.5	15													200.167	203.5	21	160.167	304.833	16
259	01:26:00	228.167	173.5	15													199.5	204.167	23	156.833	300.833	16
260	01:26:20	228.167	179.5	15													201.5	202.167	22	154.833	302.833	16
261	01:26:40	226.833	182.833	15													200.167	204.167	22	154.833	301.5	16
262	01:27:00	222.167	184.833	15																150.833	304.167	16
263	01:27:20	219.5	186.167	15																150.833	302.833	17
264	01:27:40	218.167	188.167	15																152.167	300.833	18	165.5	144.167	6
265	01:28:00	216.167	189.5	15																152.167	301.5	20	172.833	146.167	6
266	01:28:20	213.5	190.167	15																152.833	302.167	20	180.833	138.833	7
267	01:28:40	215.5	193.5	16																151.5	300.167	21	190.833	136.833	9
268	01:29:00	215.5	193.5	19																149.5	300.833	20	192.167	144.833	10
269	01:29:20	213.5	197.5	17																149.5	301.5	21	199.5	147.5	11
270	01:29:40	211.5	200.167	16																146.833	300.833	22	194.833	154.833	12
271	01:30:00	208.167	202.167	17																149.5	300.833	22	198.833	155.5	11
272	01:30:20	212.833	206.833	16																143.5	308.167	22	196.167	158.167	12
273	01:30:40	210.167	209.5	16																142.833	309.5	21	196.167	159.5	12
274	01:31:00	211.5	209.5	15																137.5	312.833	23	193.5	164.833	14
275	01:31:20	206.833	208.167	17																140.833	311.5	23	193.5	166.833	14
276	01:31:40	212.167	209.5	17																138.833	311.5	23	192.833	164.833	15
277	01:32:00	212.833	212.833	18																139.5	312.833	23	189.5	166.167	14
278	01:32:20	212.833	212.833	19																139.5	314.833	24	189.5	168.833	15
279	01:32:40	212.833	212.833	19																140.833	314.167	24	193.5	166.167	15
280	01:33:00	213.5	214.167	18																140.833	312.833	24	188.167	166.167	16
281	01:33:20	213.5	214.167	18																141.5	310.167	24	190.167	168.833	17
282	01:33:40	213.5	214.167	17																140.833	314.833	24	193.5	168.833	16
283	01:34:00	213.5	214.167	18																141.5	316.833	24	191.5	172.833	15
284	01:34:20	212.167	216.833	19																139.5	314.167	25	190.833	170.833	16
285	01:34:40	213.5	217.5	19																141.5	310.167	26	189.5	172.833	19
286	01:35:00	213.5	217.5	19																140.167	315.5	27	193.5	171.5	18
287	01:35:20	212.833	217.5	19																140.167	315.5	26	193.5	174.167	18
288	01:35:40	214.167	217.5	19																142.167	312.833	25	189.5	174.167	18
289	01:36:00	212.167	220.167	19																142.167	312.833	26	194.833	170.167	19
290	01:36:20	209.5	219.5	19																140.167	314.167	27	191.5	171.5	16
291	01:36:40	214.167	221.5	19																139.5	313.5	27	193.5	171.5	19
292	01:37:00	210.833	222.833	19																140.167	312.833	26	196.833	174.167	18
293	01:37:20	212.833	220.167	19																140.833	314.167	26	194.833	172.167	18
294	01:37:40	208.833	216.833	18																144.167	308.167	27	192.167	171.5	19
295	01:38:00	206.833	214.167	18																146.167	303.5	27	190.833	170.167	19
296	01:38:20	204.167	216.167	19																146.167	298.833	27	192.833	167.5	18
297	01:38:40	208.167	217.5	20																148.167	299.5	27	194.167	170.167	17
298	01:39:00	209.5	215.5	21																153.5	291.5	27	193.5	171.5	17
299	01:39:20	209.5	210.833	20																152.833	288.833	26	193.5	167.5	18
300	01:39:40	211.5	212.167	19																156.833	287.5	26	196.167	166.167	18
301	01:40:00	213.5	212.833	19																158.167	284.833	26	196.833	167.5	17
302	01:40:20	212.833	212.833	20																158.833	286.167	27	196.167	168.167	17
303	01:40:40	211.5	213.5	20																158.833	280.833	27	196.167	168.833	17
304	01:41:00	213.5	215.5	20																161.5	275.5	27	197.5	168.833	17
305	01:41:20	216.167	215.5	20																164.167	276.167	28	194.833	171.5	17
306	01:41:40	214.167	212.833	19																164.167	275.5	28	194.167	170.167	18
307	01:42:00	211.5	215.5	18																166.167	278.167	28	192.833	171.5	18
308	01:42:20	212.167	212.833	18																166.833	271.5	29	190.833	172.833	17
309	01:42:40	210.167	212.167	18																166.167	266.167	29	190.833	171.5	17
310	01:43:00	212.167	214.167	19																170.833	261.5	29	190.833	170.833	17
311	01:43:20	209.601	210.106	18																170.167	256.833	29	186.833	169.5	17
312	01:43:40	210.106	210.106	19																172.167	258.833	29	192.167	174.167	17
313	01:44:00	212.126	214.146	21																172.167	252.833	29	188.167	172.167	17
314	01:44:20	213.641	215.157	20																174.167	250.167	29	188.833	178.167	18
315	01:44:40	214.652	212.631	20																174.833	247.5	29	190.833	179.5	17
316	01:45:00	213.641	214.146	20																177.5	247.5	30	192.167	178.167	17
317	01:45:20	214.146	215.157	21																174.167	243.5	30	192.167	178.167	17
318	01:45:40	216.672	215.157	21																181.5	241.5	29	190.167	175.5	17
319	01:46:00	216.672	219.197	19																184.167	242.167	29	189.5	174.167	17
320	01:46:20	215.662	219.197	19																184.167	242.167	28	189.5	174.833	16
321	01:46:40	215.662	216.167	19																186.167	244.833	28	189.5	177.5	17
322	01:47:00	212.631	217.682	20																182.167	243.5	30	190.833	179.5	17
323	01:47:20	212.631	217.682	21																			190.833	179.5	18
324	01:47:40	212.631	215.662	21																			186.167	178.167	19
325	01:48:00	209.096	212.631	21																			184.833	180.833	20
326	01:48:20	206.571	211.116	22																			176.167	184.167	20
327	01:48:40	206.571	214.652	23																			172.167	186.167	21
328	01:49:00	210.611	214.652	21																			172.167	180.833	20
329	01:49:20	211.621	218.187	22																			173.5	182.167	20	232.167	246.167	37
330	01:49:40	213.136	215.157	21																			176.167	182.167	19	222.833	244.833	38
331	01:50:00	212.631	212.631	21																			176.167	183.5	20	223.5	243.5	36
332	01:50:20	214.652	210.611	20																			175.5	188.833	20	225.5	244.833	35
333	01:50:40	211.116	211.116	21																			174.833	189.5	20	220.167	240.833	34
334	01:51:00	209.601	211.116	21																			174.167	188.833	20	222.833	242.833	35
335	01:51:20	208.591	208.591	21																			172.833	191.5	18	221.5	240.833	34
336	01:51:40	211.116	206.066	21																			172.167	189.5	19	224.167	243.5	34	109.5	180.833	27
337	01:52:00	214.146	207.076	21																			170.833	186.833	18	226.833	239.5	34	119.5	178.167	26
338	01:52:20	214.146	207.076	20																			172.833	188.833	18	230.167	232.833	33	124.833	178.167	26
339	01:52:40	215.157	205.056	20																			174.167	188.833	18	230.833	234.833	33	128.167	180.833	26
340	01:53:00	215.157	202.53	20																			173.5	187.5	19	227.5	228.833	33	133.5	184.833	26
341	01:53:20	216.167	201.015	20																			168.833	191.5	18	232.167	222.167	31	134.833	182.167	26
342	01:53:40	215.662	202.53	20																			166.833	192.833	19	236.167	220.167	29	132.167	186.167	25
343	01:54:00	216.672	205.561	19																			166.833	192.833	19	236.167	219.5	28	136.833	187.5	24
344	01:54:20	215.157	204.045	19																			165.5	188.833	19	242.833	220.167	27	134.833	185.5	25
345	01:54:40	214.146	201.015	19																			162.167	186.833	21	241.5	218.167	27	144.167	179.5	24
346	01:55:00	216.167	201.015	18																			161.5	190.833	22	244.167	217.5	26	154.833	190.833	22
347	01:55:20	217.177	201.015	19																			164.167	191.5	20	247.5	218.167	25	160.167	190.833	22
348	01:55:40	218.692	201.015	20																			166.833	190.833	19	242.167	218.833	26
349	01:56:00	217.177	196.47	21																			166.833	191.5	19	238.833	218.167	27
350	01:56:20	218.187	198.49	19																			166.833	191.5	21	241.5	216.833	26
351	01:56:40	218.187	196.47	18																			166.833	191.5	19	237.5	218.833	28
352	01:57:00	217.177	196.975	17																			165.5	192.167	19	238.167	218.167	27
353	01:57:20	216.167	198.995	19																			164.833	190.167	19	236.167	219.5	26
354	01:57:40	213.641	194.449	18																			164.833	188.833	19	232.833	212.833	26				105.5	170.833	23
355	01:58:00	215.662	196.47	19																			165.5	187.5	20	236.167	216.833	27				108.167	175.5	24
356	01:58:20	214.652	196.47	20																			169.5	191.5	20	237.5	218.167	27				124.167	176.167	24
357	01:58:40	211.621	195.965	20																			166.833	191.5	18	238.167	218.167	26				126.833	176.833	23
358	01:59:00	213.136	196.975	20																			167.5	187.5	18	233.5	211.5	27				126.833	174.167	23
359	01:59:20	217.682	192.934	20																						238.833	209.5	27				133.5	178.833	24
360	01:59:40	218.692	194.449	20																						234.833	212.167	28				148.833	181.5	21
361	02:00:00	222.732	196.47	20																						236.833	211.5	28				162.167	181.5	21
362	02:00:20	220.207	194.955	19																						237.5	210.167	29				174.167	181.5	19
363	02:00:40	219.197	196.975	20																						232.833	214.167	29				173.5	183.5	21
364	02:01:00	222.227	196.975	20																						234.833	214.833	28				176.167	182.167	21
365	02:01:20	225.258	194.449	20																						232.167	213.5	27				176.833	184.167	21
366	02:01:40	221.722	194.955	19																						237.5	212.833	26				178.167	181.5	23
367	02:02:00	222.732	194.449	19																						238.833	213.5	27				173.5	187.5	19
368	02:02:20	222.227	193.944	18																						236.167	212.167	26				178.167	182.833	20
369	02:02:40	219.702	193.439	19																						238.167	211.5	25				180.833	183.5	22
370	02:03:00	219.702	193.944	19																						237.5	210.833	26				181.5	183.5	22
371	02:03:20	221.722	195.965	18																						234.833	208.833	26				180.167	180.167	21
372	02:03:40	221.217	192.934	18																						236.167	212.833	27				180.833	184.167	21
373	02:04:00	219.702	189.904	19																						233.5	208.833	26				177.5	181.5	20
374	02:04:20	214.146	192.429	18																						234.167	210.167	26				176.167	180.167	20
375	02:04:40	219.197	189.399	19																						233.5	207.5	26				178.167	182.167	20
376	02:05:00	216.167	189.904	18																						236.833	208.167	25				176.167	180.167	20
377	02:05:20	216.167	187.884	19																						236.167	210.167	26				173.5	182.833	20
378	02:05:40	216.167	187.884	19																						233.5	207.5	25				173.5	184.167	20
379	02:06:00	219.197	185.864	18																						231.5	202.167	26				170.833	180.167	20
380	02:06:20	215.157	187.884	17																						232.833	209.5	26				172.167	183.5	20
381	02:06:40	210.611	186.874	17																						231.5	202.833	25				172.167	182.833	21
382	02:07:00	213.641	187.379	17																						232.167	203.5	24				169.5	182.833	20
383	02:07:20	212.126	187.884	18																						232.167	202.833	23				173.5	178.833	20
384	02:07:40	212.631	185.864	17																						232.167	199.5	24				174.167	181.5	20
385	02:08:00	213.136	184.348	17																						233.5	197.5	23				174.833	182.167	21
386	02:08:20	213.641	185.864	18																						232.833	196.833	25				174.833	180.833	21
387	02:08:40	212.126	184.854	18																						230.833	197.5	24				174.833	181.5	22
388	02:09:00	213.136	183.338	16																						230.167	198.167	23				174.833	178.833	22
389	02:09:20	214.146	183.338	16																						230.833	198.833	23				174.833	180.833	20
390	02:09:40	213.136	182.833	17																						228.167	196.167	23				174.167	182.833	20
391	02:10:00	210.106	180.813	17																						228.167	198.167	23				174.833	181.5	20
392	02:10:20	210.106	182.833	16																						230.167	199.5	22				172.833	180.833	21
393	02:10:40	209.096	180.308	16																						228.167	196.833	22				172.833	180.167	20
394	02:11:00	207.581	181.823	17																						226.833	197.5	22				169.5	178.167	20
395	02:11:20	206.571	180.813	15																						227.5	197.5	23				169.5	180.167	20
396	02:11:40	208.591	180.813	15																						228.167	194.833	23				172.167	177.5	20
397	02:12:00	209.096	179.298	14																						225.5	194.833	23				172.167	179.5	21
398	02:12:20	204.551	179.298	14																						224.833	196.167	22				169.5	180.833	20
399	02:12:40	202.53	180.813	14																						221.5	197.5	22				168.167	180.167	20
400	02:13:00	201.52	180.308	15																						222.833	198.167	22				168.167	181.5	20
401	02:13:20	200.51	181.318	15																						220.833	197.5	22				166.833	182.833	19
402	02:13:40	200.51	182.328	14																						214.167	198.167	21				166.833	178.833	20
403	02:14:00	197.985	182.833	15																						216.167	196.833	21				166.167	178.167	19
404	02:14:20	202.025	180.813	14																						216.167	196.167	21				165.5	177.5	19
																										216.833	196.167	22				166.833	176.167	18

## Sheet: Phagosome_Cellbody
		Track 1			Track 2			Track 3			Track 4			Track 5			Track 6			Track 7			Track 8			Track 9			Track 10
	Time	dX	dY	dZ	dX	dY	dZ	dX	dY	dZ	dX	dY	dZ	dX	dY	dZ	dX	dY	dZ	dX	dY	dZ	dX	dY	dZ	dX	dY	dZ	dX	dY	dZ
1	00:00:00	5.49067	-11.89	5
2	00:00:20	5.76133	-11.542	4
3	00:00:40	5.858	-11.9093	5.5
4	00:01:00	4.91067	-11.5613	4
5	00:01:20	4.756	-11.0393	5
6	00:01:40	4.62067	-11.2327	5
7	00:02:00	5.12333	-11.3487	4
8	00:02:20	4.93	-11.3487	4
9	00:02:40	4.67867	-11.542	4.5
10	00:03:00	4.698	-11.3487	4.5
11	00:03:20	4.698	-11.194	4.5
12	00:03:40	4.62067	-11.0007	5
13	00:04:00	4.234	-11.3293	4.5
14	00:04:20	4.62067	-11.426	4.5
15	00:04:40	4.50467	-11.5807	4.5
16	00:05:00	4.62067	-11.4647	4
17	00:05:20	4.118	-11.6	4
18	00:05:40	3.98267	-11.5613	4
19	00:06:00	4.07933	-11.774	4
20	00:06:20	3.98267	-11.8513	4.5
21	00:06:40	4.002	-11.9093	3.5
22	00:07:00	3.49933	-11.31	4
23	00:07:20	3.49933	-11.6193	4.5
24	00:07:40	3.80867	-11.2713	4.5
25	00:08:00	4.02133	-11.136	3.5
26	00:08:20	3.80867	-11.0007	4.5
27	00:08:40	3.05467	-10.73	4.5
28	00:09:00	3.132	-10.6913	4
29	00:09:20	3.22867	-10.9233	4
30	00:09:40	2.91933	-11.1553	4
31	00:10:00	3.422	-10.672	5
32	00:10:20	3.84733	-10.846	4
33	00:10:40	4.07933	-10.9427	5
34	00:11:00
35	00:11:20
36	00:11:40
37	00:12:00
38	00:12:20
39	00:12:40
40	00:13:00
41	00:13:20
42	00:13:40
43	00:14:00
44	00:14:20				21.6727	-12.1607	6
45	00:14:40				21.6147	-12.47	5.5
46	00:15:00				21.4213	-11.89	7
47	00:15:20				21.0153	-11.9093	7
48	00:15:40				20.8027	-12.1993	5.5
49	00:16:00				20.532	-12.1413	6
50	00:16:20				19.7007	-11.6	6
51	00:16:40				19.5653	-11.542	6.5
52	00:17:00				19.314	-10.8847	7
53	00:17:20				19.0047	-10.092	6.5
54	00:17:40				18.5213	-9.686	6
55	00:18:00				18.386	-9.64733	6
56	00:18:20				18.5793	-9.164	6.5
57	00:18:40				17.69	-9.048	6
58	00:19:00				17.4	-8.526	6.5
59	00:19:20				17.0133	-8.758	6.5
60	00:19:40				17.4773	-8.66133	6.5
61	00:20:00				17.0713	-8.89333	6.5
62	00:20:20				17.1873	-8.83533	6
63	00:20:40				17.1873	-8.95133	6
64	00:21:00				17.0133	-8.95133	6.5
65	00:21:20				17.1873	-9.12533	6
66	00:21:40				16.298	-9.164	6
67	00:22:00				16.3947	-8.60333	6
68	00:22:20				16.1047	-8.584	6.5
69	00:22:40				16.2207	-8.95133	5.5
70	00:23:00				16.5687	-8.642	6.5
71	00:23:20				16.298	-9.37667	5.5
72	00:23:40				16.298	-9.37667	6
73	00:24:00				16.414	-8.95133	6.5
74	00:24:20				16.4333	-9.00933	6
75	00:24:40				16.008	-8.73867	6
76	00:25:00				15.6793	-8.25533	6.5
77	00:25:20				15.9113	-8.60333	7
78	00:25:40				16.3753	-8.66133	6
79	00:26:00				16.7427	-9.164	6.5
80	00:26:20				16.356	-9.454	6
81	00:26:40				16.2787	-9.20267	6.5
82	00:27:00				16.3753	-8.91267	7
83	00:27:20				15.9113	-9.29933	6.5
84	00:27:40				14.964	-9.222	6.5
85	00:28:00				14.848	-8.77733	6.5
86	00:28:20				15.0607	-8.27467	6.5
87	00:28:40				13.978	-8.004	6
88	00:29:00				14.0167	-7.83	6
89	00:29:20				13.7267	-7.86867	6.5
90	00:29:40				14.1713	-7.23067	6.5
91	00:30:00				14.2873	-6.65067	6.5
92	00:30:20				13.746	-6.74733	6.5
93	00:30:40				13.6493	-6.97933	6
94	00:31:00				13.514	-6.438	5.5
95	00:31:20				12.644	-6.18667	6.5
96	00:31:40				12.354	-6.264	5	-0.464	-14.848	-9
97	00:32:00				11.8127	-5.99333	6	-1.31467	-14.0747	-8.5
98	00:32:20				11.1167	-4.71733	4.5	-1.624	-13.688	-9.5
99	00:32:40				7.57867	-2.262	5	-1.46933	-13.5333	-7
100	00:33:00				6.47667	-1.798	4	-1.624	-13.5333	-7
101	00:33:20				6.09	-1.334	4	-1.392	-13.3013	-7.5
102	00:33:40				6.47667	-1.48867	4	-0.850667	-13.456	-7.5
103	00:34:00				5.858	-1.334	4	-1.16	-12.992	-6.5
104	00:34:20				5.394	-0.483333	3.5	-1.08267	-11.832	-6.5
105	00:34:40				5.452	-0.309333	3.5	-1.00533	-11.4453	-5.5
106	00:35:00				5.54867	0.270667	3.5	-0.850667	-11.5227	-6
107	00:35:20				5.25867	0.251333	4	-1.70133	-11.2133	-5
108	00:35:40				4.96867	0.251333	3.5	-1.46933	-11.0587	-4.5
109	00:36:00				4.79467	-0.560667	3	-1.93333	-11.6773	-4
110	00:36:20				5.29733	0	3	-1.70133	-11.2907	-3.5
111	00:36:40				5.35533	-0.0966667	3.5	-1.77867	-11.4453	-3.5
112	00:37:00				5.626	-0.212667	3	-1.624	-12.1413	-4.5
113	00:37:20				5.70333	-0.0773333	3	-1.08267	-11.9093	-4
114	00:37:40				5.49067	-0.406	3.5	-1.392	-12.296	-3.5
115	00:38:00				5.08467	-0.502667	3.5	-1.77867	-12.76	-3.5
116	00:38:20				5.54867	-0.212667	3	-1.392	-12.76	-4
117	00:38:40				5.394	-0.522	4.5	-1.392	-12.992	-3.5
118	00:39:00				5.452	-0.29	4	-1.00533	-12.992	-3.5
119	00:39:20				5.47133	-0.251333	4	-1.31467	-12.76	-3
120	00:39:40				4.94933	-0.174	4.5	-1.54667	-12.6827	-2.5
121	00:40:00				5.104	0.135333	4	-1.46933	-12.064	-2.5
122	00:40:20				5.20067	-0.174	4	-1.54667	-12.3733	-2
123	00:40:40				5.162	-0.58	5	-1.08267	-11.832	-2
124	00:41:00				4.89133	-0.889333	4	-1.16	-11.9093	-2
125	00:41:20				4.89133	-0.212667	3	-1.08267	-10.9813	-2
126	00:41:40				5.104	-0.483333	4	-0.850667	-9.744	-1.5
127	00:42:00				5.046	-0.058	4	-0.386667	-8.352	-1
128	00:42:20							-0.386667	-8.27467	-1
129	00:42:40							-0.464	-7.57867	-1.5
130	00:43:00							-0.0773333	-7.34667	-1
131	00:43:20							0	-7.34667	-0.5
132	00:43:40							-0.0773333	-7.11467	-1
133	00:44:00							0.0773333	-7.656	-0.5
134	00:44:20							0.541333	-7.03733	-1
135	00:44:40							0.309333	-7.03733	-1
136	00:45:00							1.00533	-6.80533	-0.5
137	00:45:20							1.16	-6.18667	-0.5
138	00:45:40							0.618667	-6.96	-0.5
139	00:46:00							1.23733	-5.95467	-0.5
140	00:46:20							0.773333	-5.87733	-0.5
141	00:46:40							0.618667	-6.34133	-0.5
142	00:47:00							0	-5.64533	-1
143	00:47:20							-1.00533	-5.18133	-1.5
144	00:47:40							-0.773333	-4.64	-1
145	00:48:00							-1.46933	-4.64	-0.5	21.4987	-2.70667	0.5
146	00:48:20							-0.618667	-4.33067	-0.5	21.8853	-2.62933	0.5
147	00:48:40							-0.541333	-4.33067	-0.5	21.6533	-2.47467	0.5
148	00:49:00							-0.309333	-4.176	-0.5	21.9627	-2.088	0.5
149	00:49:20							-0.309333	-4.56267	-0.5	21.808	-2.62933	0.5
150	00:49:40							-0.232	-4.176	0	21.808	-2.32	1
151	00:50:00							-0.0773333	-4.33067	-0.5	22.5813	-2.24267	0.5
152	00:50:20							-0.232	-4.09867	-1	22.272	-2.62933	0.5
153	00:50:40							-0.386667	-4.71733	-0.5	21.8853	-2.93867	1.5
154	00:51:00							-0.386667	-4.09867	-1.5	22.04	-2.552	1.5
155	00:51:20							-0.773333	-4.02133	-1.5	22.4267	-2.62933	1
156	00:51:40							-0.464	-4.25333	-1	22.4267	-2.47467	1.5
157	00:52:00							-0.696	-4.94933	-1.5	22.504	-2.784	1.5
158	00:52:20							-0.309333	-5.02667	-2	22.504	-3.016	1
159	00:52:40							-0.386667	-4.176	-1	22.504	-2.70667	1.5
160	00:53:00							-0.773333	-4.33067	-0.5	22.1947	-2.552	2.5
161	00:53:20							-0.850667	-4.71733	-1.5	22.5813	-3.17067	2
162	00:53:40										22.3493	-2.86133	2.5
163	00:54:00										22.3493	-2.86133	2.5
164	00:54:20										22.736	-2.47467	2.5
165	00:54:40										22.736	-3.17067	3
166	00:55:00										22.6007	-2.70667	3
167	00:55:20										22.504	-3.40267	2.5
168	00:55:40										22.504	-3.016	2.5
169	00:56:00										22.504	-2.86133	3.5
170	00:56:20										22.504	-2.93867	3
171	00:56:40										22.1173	-3.17067	3.5
172	00:57:00										21.344	-2.784	3.5
173	00:57:20										21.112	-2.86133	3.5
174	00:57:40										20.88	-3.17067	3.5
175	00:58:00										19.024	-2.62933	4
176	00:58:20										17.9413	-2.70667	4.5
177	00:58:40										17.0133	-2.552	5
178	00:59:00										15.2347	-2.86133	5
179	00:59:20										14.5387	-1.93333	5.5
180	00:59:40										12.992	-1.77867	4.5
181	01:00:00										7.34667	-1.00533	4
182	01:00:20										5.95467	0.232	4
183	01:00:40										5.64533	0.541333	4
184	01:01:00										5.87733	0	4	6.41867	-6.65067	-6.5
185	01:01:20										5.336	0.154667	5	6.032	-6.496	-7
186	01:01:40										5.18133	0.541333	4	5.41333	-5.49067	-7
187	01:02:00										5.02667	0.541333	4.5	5.02667	-5.87733	-6
188	01:02:20										4.94933	0.696	4	4.56267	-5.49067	-7
189	01:02:40										5.25867	0.850667	4.5	4.25333	-4.79467	-6
190	01:03:00										4.56267	0.0773333	4.5	3.55733	-4.64	-6.5
191	01:03:20										5.25867	0.154667	3	3.78933	-5.02667	-7
192	01:03:40										4.79467	0.309333	3.5	4.176	-5.02667	-6.5
193	01:04:00										5.02667	0.154667	4	4.09867	-4.48533	-5.5
194	01:04:20										5.02667	0	3.5	3.78933	-4.79467	-7
195	01:04:40										5.104	-0.154667	3.5	3.944	-4.71733	-6.5
196	01:05:00										4.79467	-0.541333	3.5	4.25333	-4.872	-6.5
197	01:05:20										3.55733	-0.386667	3.5	3.944	-4.71733	-6
198	01:05:40													3.09333	-5.104	-6.5
199	01:06:00													4.09867	-4.94933	-7
200	01:06:20													4.176	-5.18133	-6.5
201	01:06:40													3.86667	-4.94933	-5.5
202	01:07:00													3.63467	-4.408	-6.5
203	01:07:20													3.63467	-4.02133	-5.5
204	01:07:40													3.63467	-4.02133	-5.5
205	01:08:00													3.63467	-4.02133	-5.5
206	01:08:20													3.48	-4.25333	-6
207	01:08:40													3.55733	-4.09867	-4.5
208	01:09:00													3.86667	-4.176	-5
209	01:09:20													3.78933	-4.48533	-5
210	01:09:40													4.09867	-4.408	-5
211	01:10:00													3.944	-4.33067	-4.5
212	01:10:20													4.02133	-4.25333	-4.5
213	01:10:40													3.63467	-3.944	-5.5
214	01:11:00													3.63467	-3.712	-5
215	01:11:20													3.78933	-3.944	-6
216	01:11:40													3.86667	-3.944	-6	4.71733	-17.7093	-1.5
217	01:12:00													3.78933	-3.40267	-5.5	4.71733	-17.168	-1.5
218	01:12:20													3.63467	-3.63467	-5	4.64	-17.168	-0.5
219	01:12:40													3.55733	-3.248	-5	4.94933	-17.4	-1.5
220	01:13:00													3.86667	-3.32533	-4.5	5.87733	-16.472	-2.5
221	01:13:20													3.712	-3.32533	-5	6.10933	-16.0853	-1.5
222	01:13:40													3.712	-3.248	-4.5	5.95467	-15.9307	-1
223	01:14:00													3.48	-3.09333	-3.5	6.264	-16.008	-0.5
224	01:14:20													3.78933	-3.248	-5.5	6.88267	-16.472	-2
225	01:14:40													3.32533	-2.86133	-4.5	6.41867	-16.24	-0.5
226	01:15:00													3.48	-2.70667	-5	6.496	-16.1627	-1
227	01:15:20													3.86667	-2.93867	-5	6.264	-15.9307	-0.5
228	01:15:40													3.712	-3.32533	-5.5	6.41867	-16.1627	-1.5
229	01:16:00													3.712	-3.32533	-4.5	6.88267	-16.0853	-0.5
230	01:16:20													3.712	-3.17067	-5.5	6.88267	-16.008	-1
231	01:16:40													3.86667	-3.09333	-5.5	7.26933	-16.008	-1.5
232	01:17:00													3.86667	-2.93867	-5	7.424	-15.8533	-1.5
233	01:17:20													3.86667	-2.86133	-5	7.192	-15.6987	-2
234	01:17:40													3.55733	-2.93867	-5	7.03733	-15.4667	-1
235	01:18:00													3.78933	-3.09333	-5.5	6.728	-15.8533	-1
236	01:18:20													3.944	-3.016	-5	7.424	-15.08	-0.5
237	01:18:40													4.09867	-3.17067	-6	7.81067	-14.7707	-1.5
238	01:19:00													3.78933	-3.016	-4.5	7.81067	-14.616	-0.5
239	01:19:20													3.63467	-3.09333	-5.5	7.656	-14.848	-1
240	01:19:40													3.944	-3.17067	-6	8.19733	-15.08	-1
241	01:20:00													3.48	-3.17067	-6	7.656	-14.6933	-1.5
242	01:20:20													4.25333	-3.40267	-5	8.19733	-14.9253	-1
243	01:20:40													4.408	-3.944	-5	7.81067	-14.5387	-1.5
244	01:21:00													4.176	-3.40267	-4.5	8.04267	-14.384	-1
245	01:21:20													4.02133	-3.40267	-5	8.04267	-14.9253	-1.5
246	01:21:40													3.32533	-3.17067	-4.5	7.81067	-15.08	-1
247	01:22:00													3.55733	-3.17067	-4	7.73333	-14.848	-0.5
248	01:22:20													3.944	-2.93867	-4.5	7.81067	-15.0027	-0.5
249	01:22:40													3.86667	-2.93867	-4.5	7.96533	-15.0027	-0.5
250	01:23:00													3.63467	-2.93867	-5.5	7.888	-15.0027	-1.5
251	01:23:20													3.48	-2.784	-4.5	7.57867	-14.9253	-1
252	01:23:40													3.63467	-2.784	-4	7.888	-15.2347	0
253	01:24:00													3.48	-2.86133	-3.5	7.96533	-15.0027	-0.5
254	01:24:20													3.48	-3.17067	-5	7.73333	-15.544	-1.5
255	01:24:40													3.40267	-3.248	-3.5	7.656	-15.6213	-0.5
256	01:25:00													3.32533	-3.55733	-4.5	8.04267	-15.776	-1.5
257	01:25:20													2.93867	-3.248	-4	7.888	-15.312	-1.5
258	01:25:40													3.17067	-3.48	-3	7.81067	-15.2347	-0.5
259	01:26:00													3.32533	-3.55733	-4	8.27467	-14.7707	-0.5
260	01:26:20													3.09333	-2.62933	-3.5	8.50667	-14.3067	-0.5
261	01:26:40													3.09333	-2.47467	-3.5	8.352	-13.7653	-0.5
262	01:27:00																8.27467	-13.8427	-0.5
263	01:27:20																7.96533	-13.5333	-1
264	01:27:40																7.656	-13.0693	-1.5	6.10933	5.104	4.5
265	01:28:00																7.424	-12.992	-2.5	5.02667	5.02667	4.5
266	01:28:20																7.03733	-12.992	-2.5	3.78933	5.95467	4
267	01:28:40																7.424	-12.3733	-2.5	2.86133	6.57333	3.5
268	01:29:00																7.656	-12.4507	-0.5	2.70667	5.64533	4.5
269	01:29:20																7.424	-12.064	-2	1.624	5.8	3
270	01:29:40																7.50133	-11.6773	-3	1.93333	5.25867	2
271	01:30:00																6.80533	-11.4453	-2.5	1.08267	5.41333	3
272	01:30:20																8.04267	-11.7547	-3	1.93333	5.64533	2
273	01:30:40																7.81067	-11.6	-2.5	1.624	5.8	2
274	01:31:00																8.584	-11.9867	-4	2.088	5.18133	0.5
275	01:31:20																7.656	-11.9867	-3	1.54667	4.79467	1.5
276	01:31:40																8.50667	-11.832	-3	2.24267	5.18133	1
277	01:32:00																8.50667	-11.6	-2.5	2.70667	5.41333	2
278	01:32:20																8.50667	-11.832	-2.5	2.70667	5.104	2
279	01:32:40																8.352	-11.7547	-2.5	2.24267	5.41333	2
280	01:33:00																8.42933	-11.4453	-3	2.93867	5.568	1
281	01:33:20																8.352	-11.136	-3	2.70667	5.25867	0.5
282	01:33:40																8.42933	-11.6773	-3.5	2.32	5.25867	0.5
283	01:34:00																8.352	-11.9093	-3	2.552	4.79467	1.5
284	01:34:20																8.42933	-11.2907	-3	2.47467	5.336	1.5
285	01:34:40																8.352	-10.7493	-3.5	2.784	5.18133	0
286	01:35:00																8.50667	-11.368	-4	2.32	5.336	0.5
287	01:35:20																8.42933	-11.368	-3.5	2.24267	5.02667	0.5
288	01:35:40																8.352	-11.0587	-3	2.86133	5.02667	0.5
289	01:36:00																8.12	-10.7493	-3.5	2.01067	5.8	0
290	01:36:20																8.04267	-10.9813	-4	2.088	5.568	1.5
291	01:36:40																8.66133	-10.672	-4	2.39733	5.8	0
292	01:37:00																8.19733	-10.44	-3.5	1.624	5.64533	0.5
293	01:37:20																8.352	-10.904	-3.5	2.088	5.568	0.5
294	01:37:40																7.50133	-10.5947	-4.5	1.93333	5.25867	-0.5
295	01:38:00																7.03733	-10.3627	-4.5	1.856	5.104	-0.5
296	01:38:20																6.728	-9.58933	-4	1.31467	5.64533	0.5
297	01:38:40																6.96	-9.512	-3.5	1.624	5.49067	1.5
298	01:39:00																6.496	-8.816	-3	1.856	5.104	2
299	01:39:20																6.57333	-9.048	-3	1.856	5.02667	1
300	01:39:40																6.34133	-8.73867	-3.5	1.77867	5.336	0.5
301	01:40:00																6.41867	-8.352	-3.5	1.93333	5.25867	1
302	01:40:20																6.264	-8.50667	-3.5	1.93333	5.18133	1.5
303	01:40:40																6.10933	-7.81067	-3.5	1.77867	5.18133	1.5
304	01:41:00																6.032	-6.96	-3.5	1.856	5.41333	1.5
305	01:41:20																6.032	-7.03733	-4	2.47467	5.104	1.5
306	01:41:40																5.8	-7.26933	-4.5	2.32	4.94933	0.5
307	01:42:00																5.25867	-7.26933	-5	2.16533	5.104	0
308	01:42:20																5.25867	-6.80533	-5.5	2.47467	4.64	0.5
309	01:42:40																5.104	-6.264	-5.5	2.24267	4.71733	0.5
310	01:43:00																4.79467	-5.49067	-5	2.47467	5.02667	1
311	01:43:20																4.57438	-5.42036	-5.5	2.64105	4.7103	0.5
312	01:43:40																4.40097	-5.65236	-5	2.08097	4.16897	1
313	01:44:00																4.63531	-4.48768	-4	2.77931	4.86966	2
314	01:44:20																4.57907	-4.06117	-4.5	2.87774	4.29083	1
315	01:44:40																4.61891	-4.04477	-4.5	2.76291	3.84323	1.5
316	01:45:00																4.1924	-3.86901	-5	2.49107	4.17366	1.5
317	01:45:20																4.63766	-3.28784	-4.5	2.54966	4.29083	2
318	01:45:40																4.07992	-3.05584	-4	3.07459	4.60016	2
319	01:46:00																3.77059	-2.66448	-5	3.15192	5.22352	1
320	01:46:20																3.65341	-2.66448	-4.5	3.03475	5.14618	1.5
321	01:46:40																3.42141	-3.32533	-4.5	3.03475	4.48533	1
322	01:47:00																3.5339	-2.99491	-5	2.52857	4.42909	1.5
323	01:47:20																			2.52857	4.42909	1.5
324	01:47:40																			3.0699	4.34941	1
325	01:48:00																			2.81446	3.68857	0.5
326	01:48:20																			3.52687	3.12614	1
327	01:48:40																			3.99087	3.30424	1
328	01:49:00																			4.45956	3.92291	0.5
329	01:49:20																			4.42206	4.17834	1	-2.38327	-3.24566	-7.5
330	01:49:40																			4.28848	3.82683	1	-1.12485	-3.44251	-8.5
331	01:50:00																			4.2299	3.37923	0.5	-1.26077	-3.58077	-7.5
332	01:50:20																			4.54158	2.52622	0	-1.25842	-3.96978	-7.5
333	01:50:40																			4.20881	2.50747	0.5	-1.04986	-3.44719	-6.5
334	01:51:00																			4.11038	2.58481	0.5	-1.53495	-3.67919	-7
335	01:51:20																			4.14788	1.98255	1.5	-1.49745	-3.74012	-6.5
336	01:51:40																			4.51814	1.92162	1	-1.51386	-4.34238	-6.5	11.7875	2.92695	-3
337	01:52:00																			5.02432	2.34812	1.5	-1.47168	-3.76121	-6.5	10.979	3.35345	-2.5
338	01:52:20																			4.79232	2.11612	1	-1.85834	-2.98788	-6.5	10.3603	3.35345	-3
339	01:52:40																			4.75483	1.88178	1	-1.81851	-3.45422	-6.5	10.0908	2.80978	-3
340	01:53:00																			4.83216	1.74352	0.5	-1.43184	-3.05115	-6.5	9.47216	2.05285	-3
341	01:53:20																			5.49067	1.10376	1	-1.856	-2.45358	-5.5	9.43467	2.18642	-3
342	01:53:40																			5.66408	1.12485	0.5	-2.37859	-2.04582	-4.5	9.68541	1.89818	-2.5
343	01:54:00																			5.78125	1.47636	0	-2.26141	-1.61697	-4.5	9.26125	2.09503	-2.5
344	01:54:20																			5.76016	1.76461	0	-3.21051	-1.87006	-4	9.31749	2.15127	-3
345	01:54:40																			6.02966	1.64509	-1	-3.17301	-1.98958	-4	8.11766	2.49576	-2.5
346	01:55:00																			6.34133	1.18109	-2	-3.248	-1.91224	-4	7.11467	1.18109	-2
347	01:55:20																			6.14917	1.10376	-0.5	-3.51749	-1.98958	-3	6.61317	1.18109	-1.5
348	01:55:40																			6.0156	1.18109	0.5	-2.72307	-2.06691	-3
349	01:56:00																			5.83984	0.576485	1	-2.51216	-2.51685	-3
350	01:56:20																			5.95701	0.810828	-1	-2.70432	-2.12784	-3.5
351	01:56:40																			5.95701	0.576485	-0.5	-2.24032	-2.59418	-5
352	01:57:00																			5.99451	0.557737	-1	-2.43483	-2.45826	-5
353	01:57:20																			5.95467	1.02408	0	-2.32	-2.37859	-3.5
354	01:57:40																			5.66174	0.651475	-0.5	-2.22626	-2.13253	-4				12.5444	2.73947	-2.5
355	01:58:00																			5.81875	1.04048	-0.5	-2.37859	-2.36218	-4				12.4694	2.43248	-2.5
356	01:58:20																			5.23758	0.576485	0	-2.65042	-2.51685	-3.5				10.4962	2.35515	-2
357	01:58:40																			5.19539	0.517899	1	-3.07927	-2.57543	-3				9.83539	2.21923	-1.5
358	01:59:00																			5.29382	1.09907	1	-2.36218	-1.68493	-3.5				10.0112	2.64574	-1.5
359	01:59:20																						-2.45358	-1.92162	-3.5				9.76509	1.63572	-2
360	01:59:40																						-1.8724	-2.05519	-4				8.1036	1.50214	-0.5
361	02:00:00																						-1.63572	-1.74352	-4				7.02562	1.73648	-0.5
362	02:00:20																						-2.00598	-1.76461	-5				5.34069	1.56073	0
363	02:00:40																						-1.58182	-1.99426	-4.5				5.30085	1.56307	-0.5
364	02:01:00																						-1.4623	-2.0716	-4				5.34303	1.71774	-0.5
365	02:01:20																						-0.801455	-2.20986	-3.5				5.61721	1.19281	-0.5
366	02:01:40																						-1.83022	-2.07394	-3.5				5.05244	1.56073	-2
367	02:02:00																						-1.86772	-2.20986	-4				5.71095	0.806141	0
368	02:02:20																						-1.61697	-2.11378	-4				5.11103	1.28889	-1
369	02:02:40																						-2.1419	-2.09503	-3				4.50877	1.15297	-1.5
370	02:03:00																						-2.06457	-1.95911	-3.5				4.43143	1.21156	-1.5
371	02:03:20																						-1.52089	-1.49277	-4				4.82044	1.83257	-1.5
372	02:03:40																						-1.73414	-2.30828	-4.5				4.68453	1.01705	-1.5
373	02:04:00																						-1.60057	-2.1958	-3.5				4.89543	0.974869	-0.5
374	02:04:20																						-2.32234	-2.05754	-4				4.40566	1.42246	-1
375	02:04:40																						-1.65915	-2.09972	-3.5				4.75952	0.838949	-0.5
376	02:05:00																						-2.39733	-2.11846	-3.5				4.64	1.12954	-1
377	02:05:20																						-2.32	-2.58481	-3.5				4.94933	0.585859	-0.5
378	02:05:40																						-2.01067	-2.27547	-3				4.94933	0.431192	-0.5
379	02:06:00																						-1.42715	-1.89115	-4				5.61018	0.660848	-1
380	02:06:20																						-2.05051	-2.50747	-4.5				4.98683	0.508525	-1.5
381	02:06:40																						-2.42311	-1.85131	-4				4.45956	0.468687	-2
382	02:07:00																						-2.14893	-1.87006	-3.5				5.1204	0.527273	-1.5
383	02:07:20																						-2.32469	-1.73414	-2.5				4.48065	1.04986	-1
384	02:07:40																						-2.2661	-1.58182	-3.5				4.4619	0.506182	-1.5
385	02:08:00																						-2.36218	-1.52558	-3				4.44315	0.253091	-2
386	02:08:20																						-2.22626	-1.27248	-3.5				4.50174	0.583515	-1.5
387	02:08:40																						-2.17002	-1.46699	-3				4.32598	0.38901	-2
388	02:09:00																						-1.97552	-1.72008	-3.5				4.44315	0.522586	-3
389	02:09:20																						-1.93568	-1.79741	-3.5				4.56032	0.290586	-2
390	02:09:40																						-1.74352	-1.54667	-3				4.52048	0	-1.5
391	02:10:00																						-2.09503	-2.01301	-3				4.09164	-0.0796768	-1.5
392	02:10:20																						-2.32703	-1.93333	-3				4.32364	0.232	-2.5
393	02:10:40																						-2.2122	-1.91693	-3				4.20646	0.016404	-2
394	02:11:00																						-2.23329	-1.81851	-2.5				4.41737	0.424162	-1.5
395	02:11:20																						-2.4278	-1.93568	-4				4.3002	0.0749899	-2.5
396	02:11:40																						-2.27079	-1.62634	-4				4.22521	0.384323	-2.5
397	02:12:00																						-1.90287	-1.8021	-4.5				4.2838	-0.0234343	-3.5
398	02:12:20																						-2.35281	-1.95677	-4				4.06586	-0.178101	-3
399	02:12:40																						-2.20048	-1.93568	-4				3.98618	0.0749899	-3
400	02:13:00																						-2.47232	-2.0716	-3.5				3.86901	-0.138263	-2.5
401	02:13:20																						-2.35749	-1.87709	-3.5				3.90651	-0.175758	-2
402	02:13:40																						-1.58416	-1.83725	-3.5				3.90651	0.405414	-3
403	02:14:00																						-2.10909	-1.624	-3				3.69091	0.541333	-2
404	02:14:20																						-1.6404	-1.78101	-3.5				4.23693	0.384323	-2.5

## Sheet: Phagosome_Cellbody-dist
		Track 1			Track 2			Track 3			Track 4			Track 5			Track 6			Track 7			Track 8			Track 9			Track 10
	Time	Time	Distance (um)	Rab5 on	Time	Distance (um)	Rab5 on	Time	Distance (um)	Rab5 on	Time	Distance (um)	Rab5 on	Time	Distance (um)	Rab5 on	Time	Distance (um)	Rab5 on	Time	Distance (um)	Rab5 on	Time	Distance (um)	Rab5 on	Time	Distance (um)	Rab5 on	Time	Distance (um)	Rab5 on		Duration
1	00:00:00	00:00:00	14.0185		00:14:20	25.5653		00:31:40	17.3689		00:48:00	21.6741		01:01:00	11.2996		01:11:40	18.3881		01:27:40	9.14466		01:49:20	8.5126		01:51:40	12.5105		01:57:40	13.0812
2	00:00:20	00:00:20	13.506		00:14:40	25.5528		00:32:00	16.4947		00:48:20	22.0484		01:01:20	11.2953		01:12:00	17.8674		01:28:00	8.41337		01:49:40	9.23938		01:52:00	11.7488		01:58:00	12.9481
3	00:00:40	00:00:40	14.3666		00:15:00	25.4803		00:32:20	16.7406		00:48:40	21.8		01:01:40	10.414		01:12:20	17.791		01:28:20	8.11277		01:50:00	8.40604		01:52:20	11.2952		01:58:20	10.9416
4	00:01:00	00:01:00	13.1825	x	00:15:20	25.1491		00:32:40	15.3072		00:49:00	22.0674		01:02:00	9.78828		01:12:40	18.1523		01:28:40	7.97784		01:50:20	8.57862		01:52:40	10.8959		01:58:40	10.1936
5	00:01:20	00:01:20	13.0187	x	00:15:40	24.7351		00:33:00	15.3228		00:49:20	21.9716		01:02:20	9.99827		01:13:00	17.6669		01:29:00	7.71011		01:50:40	7.43205		01:53:00	10.1457		01:59:00	10.4629
6	00:01:40	00:01:40	13.1348	x	00:16:00	24.5962		00:33:20	15.3334		00:49:40	21.9538		01:02:40	8.7795		01:13:20	17.2717		01:29:20	6.72885		01:51:00	8.05559		01:53:20	10.1387		01:59:20	10.1011
7	00:02:00	00:02:00	13.0783	x	00:16:20	23.6363		00:33:40	15.4285		00:50:00	22.6979		01:03:00	8.74267		01:13:40	17.0366		01:29:40	5.94906		01:51:20	7.64728		01:53:40	10.1814		01:59:40	8.2568
8	00:02:20	00:02:20	13.0037	x	00:16:40	23.6277		00:34:00	14.5735		00:50:20	22.4322		01:03:20	9.41416		01:14:00	17.1972		01:30:00	6.28302		01:51:40	7.96229		01:54:00	9.81886		02:00:00	7.25429
9	00:02:40	00:02:40	13.2423	x	00:17:00	23.2488		00:34:20	13.5432		00:50:40	22.1326		01:03:40	9.21718		01:14:20	17.9638		01:30:20	6.29345		01:52:00	7.65262		01:54:20	10.0222		02:00:20	5.56406
10	00:03:00	00:03:00	13.081	x	00:17:20	22.4783		00:34:40	12.738		00:51:00	22.2379		01:04:00	8.19556		01:14:40	17.4696		01:30:40	6.34645		01:52:20	7.39127		01:54:40	8.85297		02:00:40	5.54907
11	00:03:20	00:03:20	12.9471	x	00:17:40	21.7453		00:35:00	13.019		00:51:20	22.6024		01:04:20	9.29236		01:15:00	17.4479		01:31:00	5.60856		01:52:40	7.58212		01:55:00	7.48421		02:01:00	5.63459
12	00:03:40	00:03:40	12.937	x	00:18:00	21.6129		00:35:20	12.3949		00:51:40	22.6126		01:04:40	8.94753		01:15:20	17.1252		01:31:20	5.25652		01:53:00	7.32186		01:55:20	6.88324		02:01:20	5.76419
13	00:04:00	00:04:00	12.9047	x	00:18:20	21.7122		00:35:40	12.0293		00:52:00	22.7251		01:05:00	9.16936		01:15:40	17.4551		01:31:40	5.73374		01:53:20	6.30197					02:01:40	5.65359
14	00:04:20	00:04:20	13.1207	x	00:18:40	20.7558		00:36:00	12.4939		00:52:20	22.7272		01:05:20	8.59118		01:16:00	17.5031		01:32:00	6.37418		01:53:40	5.48571					02:02:00	5.76757
15	00:04:40	00:04:40	13.2157	x	00:19:00	20.4378		00:36:20	11.9425		00:52:40	22.7158		01:05:40	8.82437		01:16:20	17.4536		01:32:20	6.11366		01:54:00	5.28948					02:02:20	5.36506
16	00:05:00	00:05:00	12.9919	x	00:19:20	20.2091		00:36:40	12.1		00:53:00	22.4803		01:06:00	9.50237		01:16:40	17.6451		01:32:40	6.19142		01:54:20	5.45935					02:02:40	4.88961
17	00:05:20	00:05:20	12.9429	x	00:19:40	20.5603		00:37:00	13.0499		00:53:20	22.8904		01:06:20	9.30243		01:17:00	17.5697		01:33:00	6.37482		01:54:40	5.47964					02:03:00	4.83275
18	00:05:40	00:05:40	12.8657	x	00:20:00	20.3168		00:37:20	12.6097		00:53:40	22.67		01:06:40	8.34847		01:17:20	17.3831		01:33:20	5.93545		01:55:00	5.49601					02:03:20	5.37075
19	00:06:00	00:06:00	13.0869	x	00:20:20	20.2353		00:37:40	12.86		00:54:00	22.67		01:07:00	8.65397		01:17:40	17.0218		01:33:40	5.7694		01:55:20	5.03301					02:03:40	5.02286
20	00:06:20	00:06:20	13.2878	x	00:20:40	20.2862		00:38:00	13.3503		00:54:20	23.0065		01:07:20	7.72217		01:18:00	17.2509		01:34:00	5.63485		01:55:40	4.54832					02:04:00	5.01654
21	00:06:40	00:06:40	13.0422	x	00:21:00	20.2936		00:38:20	13.4445		00:54:40	23.1512		01:07:40	7.72217		01:18:20	16.8158		01:34:20	6.07016		01:56:00	4.65247					02:04:20	4.73637
22	00:07:00	00:07:00	12.4965	x	00:21:20	20.3636		00:38:40	13.527		00:55:00	22.959		01:08:00	7.72217		01:18:40	16.7758		01:34:40	5.88191		01:56:20	4.90826					02:04:40	4.85869
23	00:07:20	00:07:20	12.9423	x	00:21:40	19.6368		00:39:00	13.4927		00:55:20	22.8967		01:08:20	8.13641		01:19:00	16.5796		01:35:00	5.83997		01:56:40	6.06208					02:05:00	4.87908
24	00:07:40	00:07:40	12.72	x	00:22:00	19.4628		00:39:20	13.1737		00:55:40	22.8424		01:08:40	7.05008		01:19:20	16.7355		01:35:20	5.52693		01:57:00	6.08041					02:05:20	5.00891
25	00:08:00	00:08:00	12.3463	x	00:22:20	19.3725		00:39:40	13.0189		00:56:00	22.9536		01:09:00	7.57562		01:19:40	17.1931		01:35:40	5.80557		01:57:20	4.82598					02:05:40	4.99318
26	00:08:20	00:08:20	12.4808	x	00:22:40	19.3258		00:40:00	12.4076		00:56:20	22.8925		01:09:20	7.71215		01:20:00	16.6361		01:36:00	6.13863		01:57:40	5.05014					02:06:00	5.7368
27	00:08:40	00:08:40	12.0297	x	00:23:00	19.7852		00:40:20	12.629		00:56:40	22.6159		01:09:40	7.82493		01:20:20	17.0576		01:36:20	6.13289		01:58:00	5.21896					02:06:20	5.23231
28	00:09:00	00:09:00	11.837	x	00:23:20	19.5907		00:40:40	12.0486		00:57:00	21.8075		01:10:00	7.38646		01:20:40	16.5719		01:36:40	6.27592		01:58:20	5.06056					02:06:40	4.90992
29	00:09:20	00:09:20	12.0724	x	00:23:40	19.7369		00:41:00	12.1317		00:57:20	21.5906		01:10:20	7.38322		01:21:00	16.5101		01:37:00	5.89552		01:58:40	5.01147					02:07:00	5.36158
30	00:09:40	00:09:40	12.2051		00:24:00	19.7938		00:41:20	11.2144		00:57:40	21.4074		01:10:40	7.68218		01:21:20	17.0206		01:37:20	5.96761		01:59:00	4.54631					02:07:20	4.70939
31	00:10:00	00:10:00	12.272		00:24:20	19.678		00:41:40	9.89541		00:58:00	19.617		01:11:00	7.21039		01:21:40	17.0121		01:37:40	5.62506		01:59:20	4.68643					02:07:40	4.73442
32	00:10:20	00:10:20	12.1835		00:24:40	19.1995		00:42:00	8.42054		00:58:20	18.694		01:11:20	8.11876		01:22:00	16.7487		01:38:00	5.45395		01:59:40	4.87132					02:08:00	4.8791
33	00:10:40	00:10:40	12.7037		00:25:00	18.8744		00:42:20	8.34384		00:58:40	17.9155		01:11:40	8.15514		01:22:20	16.9215		01:38:20	5.81792		02:00:00	4.65998					02:08:20	4.78081
34	00:11:00				00:25:20	19.3956		00:42:40	7.7396		00:59:00	16.2875		01:12:00	7.49581		01:22:40	16.9934		01:38:40	5.91902		02:00:20	5.66902					02:08:40	4.78178
35	00:11:20				00:25:40	19.4723		00:43:00	7.41482		00:59:20	15.664		01:12:20	7.17089		01:23:00	17.0162		01:39:00	5.78753		02:00:40	5.17003					02:09:00	5.38653
36	00:11:40				00:26:00	20.163		00:43:20	7.36366		00:59:40	13.8638		01:12:40	6.94292		01:23:20	16.7691		01:39:20	5.45088		02:01:00	4.73602					02:09:20	4.98808
37	00:12:00				00:26:20	19.8216		00:43:40	7.18502		01:00:00	8.42521		01:13:00	6.80139		01:23:40	17.1556		01:39:40	5.64682		02:01:20	4.21614					02:09:40	4.76285
38	00:12:20				00:26:40	19.7973		00:44:00	7.6727		01:00:20	7.17718		01:13:20	7.05952		01:24:00	16.9934		01:40:00	5.69134		02:01:40	4.46105					02:10:00	4.35865
39	00:12:40				00:27:00	19.9145		00:44:20	7.12861		01:00:40	6.93994		01:13:40	6.67671		01:24:20	17.4261		01:40:20	5.7301		02:02:00	4.93678					02:10:20	4.99977
40	00:13:00				00:27:20	19.5422		00:44:40	7.11476		01:01:00	7.10936		01:14:00	5.82487		01:24:40	17.4037		01:40:40	5.67978		02:02:20	4.80444					02:10:40	4.65775
41	00:13:20				00:27:40	18.7408		00:45:00	6.89734		01:01:20	7.31415		01:14:20	7.42688		01:25:00	17.7712		01:41:00	5.91599		02:02:40	4.23992					02:11:00	4.68435
42	00:13:40				00:28:00	18.4324		00:45:20	6.3143		01:01:40	6.56805		01:14:40	6.28451		01:25:20	17.2895		01:41:20	5.86726		02:03:00	4.51116					02:11:20	4.97467
43	00:14:00				00:28:20	18.3724		00:45:40	7.00531		01:02:00	6.76834		01:15:00	6.66607		01:25:40	17.1275		01:41:40	5.48893		02:03:20	4.53227					02:11:40	4.92444
44	00:14:20				00:28:40	17.1886		00:46:00	6.10238		01:02:20	6.40159		01:15:20	6.97043		01:26:00	16.9379		01:42:00	5.54432		02:03:40	5.34653					02:12:00	5.53186
45	00:14:40				00:29:00	17.1399		00:46:20	5.94904		01:02:40	6.97332		01:15:40	7.42205		01:26:20	16.6521		01:42:20	5.28238		02:04:00	4.43095					02:12:20	5.05598
46	00:15:00				00:29:20	17.1052		00:46:40	6.39103		01:03:00	6.40889		01:16:00	6.71467		01:26:40	16.1087		01:42:40	5.24717		02:04:20	5.06229					02:12:40	4.98952
47	00:15:20				00:29:40	17.186		00:47:00	5.73322		01:03:20	6.05619		01:16:20	7.35405		01:27:00	16.135		01:43:00	5.69134		02:04:40	4.40586					02:13:00	4.60851
48	00:15:40				00:30:00	17.0473		00:47:20	5.48698		01:03:40	5.94428		01:16:40	7.40066		01:27:20	15.7352		01:43:20	5.42329		02:05:00	4.74185					02:13:20	4.39223
49	00:16:00				00:30:20	16.6352		00:47:40	4.80912		01:04:00	6.42583		01:17:00	6.97043		01:27:40	15.2208		01:43:40	4.76558		02:05:20	4.93089					02:13:40	4.94218
50	00:16:20				00:30:40	16.4625		00:48:00	4.8927		01:04:20	6.12514		01:17:20	6.93818		01:28:00	15.171		01:44:00	5.95299		02:05:40	4.26856					02:14:00	4.23271
51	00:16:40				00:31:00	15.9476		00:48:20	4.40312		01:04:40	6.1907		01:17:40	6.8037		01:28:20	14.9855		01:44:20	5.26237		02:06:00	4.649					02:14:20	4.9345
52	00:17:00				00:31:20	15.5047		00:48:40	4.39292		01:05:00	5.96086		01:18:00	7.36055		01:28:40	14.6446		01:44:40	4.96529		02:06:20	5.54455
53	00:17:20				00:31:40	14.7261		00:49:00	4.21719		01:05:20	5.00541		01:18:20	7.04637		01:29:00	14.6248		01:45:00	5.08673		02:06:40	5.02979
54	00:17:40				00:32:00	14.5416		00:49:20	4.60039					01:18:40	7.92794		01:29:20	14.3058		01:45:20	5.37698		02:07:00	4.51276
55	00:18:00				00:32:20	12.8873		00:49:40	4.18244					01:19:00	6.611		01:29:40	14.1997		01:45:40	5.88341		02:07:20	3.82902
56	00:18:20				00:32:40	9.35697		00:50:00	4.36012					01:19:20	7.28214		01:30:00	13.5484		01:46:00	6.18221		02:07:40	4.45952
57	00:18:40				00:33:00	7.82177		00:50:20	4.22527					01:19:40	7.84909		01:30:20	14.5553		01:46:20	6.15978		02:08:00	4.11185
58	00:19:00				00:33:20	7.40727		00:50:40	4.75949					01:20:00	7.6265		01:30:40	14.2062		01:46:40	5.50708		02:08:20	4.33883
59	00:19:20				00:33:40	7.7565		00:51:00	4.38162					01:20:20	7.39385		01:31:00	15.2763		01:47:00	5.31606		02:08:40	3.98259
60	00:19:40				00:34:00	7.21774		00:51:20	4.3611					01:20:40	7.74504		01:31:20	14.536		01:47:20	5.31606		02:09:00	4.37165
61	00:20:00				00:34:20	6.44817		00:51:40	4.39388					01:21:00	7.01905		01:31:40	14.8782		01:47:40	5.4168		02:09:20	4.38492
62	00:20:20				00:34:40	6.48614		00:52:00	5.21827					01:21:20	7.26287		01:32:00	14.6005		01:48:00	4.66655		02:09:40	3.79895
63	00:20:40				00:35:00	6.56589		00:52:20	5.41877					01:21:40	6.43125		01:32:20	14.7855		01:48:20	4.81784		02:10:00	4.17629
64	00:21:00				00:35:20	6.61186		00:52:40	4.31144					01:22:00	6.22156		01:32:40	14.6348		01:48:40	5.27684		02:10:20	4.26062
65	00:21:20				00:35:40	6.08283		00:53:00	4.4275					01:22:20	6.6664		01:33:00	14.5275		01:49:00	5.96044		02:10:40	4.19147
66	00:21:40				00:36:00	5.68359		00:53:20	5.02264					01:22:40	6.62094		01:33:20	14.2396		01:49:20	6.16548		02:11:00	3.81373
67	00:22:00				00:36:20	6.08784								01:23:00	7.21779		01:33:40	14.8211		01:49:40	5.83401		02:11:20	5.0637
68	00:22:20				00:36:40	6.39835								01:23:20	6.33333		01:34:00	14.8522		01:50:00	5.43703		02:11:40	4.87868
69	00:22:40				00:37:00	6.37943								01:23:40	6.07959		01:34:20	14.406		01:50:20	5.19689		02:12:00	5.20754
70	00:23:00				00:37:20	6.44469								01:24:00	5.70505		01:34:40	14.0554		01:50:40	4.92458		02:12:20	5.03633
71	00:23:20				00:37:40	6.52398								01:24:20	6.86757		01:35:00	14.7511		01:51:00	4.88124		02:12:40	4.95873
72	00:23:40				00:38:00	6.19326								01:24:40	5.86325		01:35:20	14.5786		01:51:20	4.83584		02:13:00	4.75961
73	00:24:00				00:38:20	6.31133								01:25:00	6.63042		01:35:40	14.1792		01:51:40	5.01061		02:13:20	4.61858
74	00:24:20				00:38:40	7.04398								01:25:20	5.93172		01:36:00	13.9188		01:52:00	5.74522		02:13:40	4.25853
75	00:24:40				00:39:00	6.76819								01:25:40	5.58243		01:36:20	14.1871		01:52:20	5.33332		02:14:00	4.01069
76	00:25:00				00:39:20	6.78223								01:26:00	6.30178		01:36:40	14.3147		01:52:40	5.21052		02:14:20	4.25593
77	00:25:20				00:39:40	6.6915								01:26:20	5.36023		01:37:00	13.7273		01:53:00	5.16136
78	00:25:40				00:40:00	6.48607								01:26:40	5.28608		01:37:20	14.174		01:53:20	5.68909
79	00:26:00				00:40:20	6.56332											01:37:40	13.7392		01:53:40	5.7963
80	00:26:20				00:40:40	7.2099											01:38:00	13.3101		01:54:00	5.96679
81	00:26:40				00:41:00	6.38091											01:38:20	12.3783		01:54:20	6.02439
82	00:27:00				00:41:20	5.74198											01:38:40	12.2951		01:54:40	6.32954
83	00:27:20				00:41:40	6.50265											01:39:00	11.3543		01:55:00	6.75333
84	00:27:40				00:42:00	6.43937											01:39:20	11.5791		01:55:20	6.26742
85	00:28:00																01:39:40	11.3502		01:55:40	6.1508
86	00:28:20																01:40:00	11.0998		01:56:00	5.95282
87	00:28:40																01:40:20	11.1288		01:56:20	6.09454
88	00:29:00																01:40:40	10.5157		01:56:40	6.00569
89	00:29:20																01:41:00	9.85275		01:57:00	6.10288
90	00:29:40																01:41:20	10.095		01:57:20	6.04209
91	00:30:00																01:41:40	10.3312		01:57:40	5.72099
92	00:30:20																01:42:00	10.2712		01:58:00	5.93215
93	00:30:40																01:42:20	10.2086		01:58:20	5.26921
94	00:31:00																01:42:40	9.77438		01:58:40	5.31605
95	00:31:20																01:43:00	8.83947		01:59:00	5.49841
96	00:31:40																01:43:20	8.97526
97	00:32:00																01:43:40	8.736
98	00:32:20																01:44:00	7.59114
99	00:32:40																01:44:20	7.59678
100	00:33:00																01:44:40	7.61213
101	00:33:20																01:45:00	7.58587
102	00:33:40																01:45:20	7.25036
103	00:34:00																01:45:40	6.4795
104	00:34:20																01:46:00	6.80564
105	00:34:40																01:46:20	6.37941
106	00:35:00																01:46:40	6.5585
107	00:35:20																01:47:00	6.816
108	00:35:40
109	00:36:00
110	00:36:20
111	00:36:40
112	00:37:00
113	00:37:20
114	00:37:40
115	00:38:00
116	00:38:20
117	00:38:40
118	00:39:00
119	00:39:20
120	00:39:40
121	00:40:00
122	00:40:20
123	00:40:40
124	00:41:00
125	00:41:20
126	00:41:40
127	00:42:00
128	00:42:20
129	00:42:40
130	00:43:00
131	00:43:20
132	00:43:40
133	00:44:00
134	00:44:20
135	00:44:40
136	00:45:00
137	00:45:20
138	00:45:40
139	00:46:00
140	00:46:20
141	00:46:40
142	00:47:00
143	00:47:20
144	00:47:40
145	00:48:00
146	00:48:20
147	00:48:40
148	00:49:00
149	00:49:20
150	00:49:40
151	00:50:00
152	00:50:20
153	00:50:40
154	00:51:00
155	00:51:20
156	00:51:40
157	00:52:00
158	00:52:20
159	00:52:40
160	00:53:00
161	00:53:20
162	00:53:40
163	00:54:00
164	00:54:20
165	00:54:40
166	00:55:00
167	00:55:20
168	00:55:40
169	00:56:00
170	00:56:20
171	00:56:40
172	00:57:00
173	00:57:20
174	00:57:40
175	00:58:00
176	00:58:20
177	00:58:40
178	00:59:00
179	00:59:20
180	00:59:40
181	01:00:00
182	01:00:20
183	01:00:40
184	01:01:00
185	01:01:20
186	01:01:40
187	01:02:00
188	01:02:20
189	01:02:40
190	01:03:00
191	01:03:20
192	01:03:40
193	01:04:00
194	01:04:20
195	01:04:40
196	01:05:00
197	01:05:20
198	01:05:40
199	01:06:00
200	01:06:20
201	01:06:40
202	01:07:00
203	01:07:20
204	01:07:40
205	01:08:00
206	01:08:20
207	01:08:40
208	01:09:00
209	01:09:20
210	01:09:40
211	01:10:00
212	01:10:20
213	01:10:40
214	01:11:00
215	01:11:20
216	01:11:40
217	01:12:00
218	01:12:20
219	01:12:40
220	01:13:00
221	01:13:20
222	01:13:40
223	01:14:00
224	01:14:20
225	01:14:40
226	01:15:00
227	01:15:20
228	01:15:40
229	01:16:00
230	01:16:20
231	01:16:40
232	01:17:00
233	01:17:20
234	01:17:40
235	01:18:00
236	01:18:20
237	01:18:40
238	01:19:00
239	01:19:20
240	01:19:40
241	01:20:00
242	01:20:20
243	01:20:40
244	01:21:00
245	01:21:20
246	01:21:40
247	01:22:00
248	01:22:20
249	01:22:40
250	01:23:00
251	01:23:20
252	01:23:40
253	01:24:00
254	01:24:20
255	01:24:40
256	01:25:00
257	01:25:20
258	01:25:40
259	01:26:00
260	01:26:20
261	01:26:40
262	01:27:00
263	01:27:20
264	01:27:40
265	01:28:00
266	01:28:20
267	01:28:40
268	01:29:00
269	01:29:20
270	01:29:40
271	01:30:00
272	01:30:20
273	01:30:40
274	01:31:00
275	01:31:20
276	01:31:40
277	01:32:00
278	01:32:20
279	01:32:40
280	01:33:00
281	01:33:20
282	01:33:40
283	01:34:00
284	01:34:20
285	01:34:40
286	01:35:00
287	01:35:20
288	01:35:40
289	01:36:00
290	01:36:20
291	01:36:40
292	01:37:00
293	01:37:20
294	01:37:40
295	01:38:00
296	01:38:20
297	01:38:40
298	01:39:00
299	01:39:20
300	01:39:40
301	01:40:00
302	01:40:20
303	01:40:40
304	01:41:00
305	01:41:20
306	01:41:40
307	01:42:00
308	01:42:20
309	01:42:40
310	01:43:00
311	01:43:20
312	01:43:40
313	01:44:00
314	01:44:20
315	01:44:40
316	01:45:00
317	01:45:20
318	01:45:40
319	01:46:00
320	01:46:20
321	01:46:40
322	01:47:00
323	01:47:20
324	01:47:40
325	01:48:00
326	01:48:20
327	01:48:40
328	01:49:00
329	01:49:20
330	01:49:40
331	01:50:00
332	01:50:20
333	01:50:40
334	01:51:00
335	01:51:20
336	01:51:40
337	01:52:00
338	01:52:20
339	01:52:40
340	01:53:00
341	01:53:20
342	01:53:40
343	01:54:00
344	01:54:20
345	01:54:40
346	01:55:00
347	01:55:20
348	01:55:40
349	01:56:00
350	01:56:20
351	01:56:40
352	01:57:00
353	01:57:20
354	01:57:40
355	01:58:00
356	01:58:20
357	01:58:40
358	01:59:00
359	01:59:20
360	01:59:40
361	02:00:00
362	02:00:20
363	02:00:40
364	02:01:00
365	02:01:20
366	02:01:40
367	02:02:00
368	02:02:20
369	02:02:40
370	02:03:00
371	02:03:20
372	02:03:40
373	02:04:00
374	02:04:20
375	02:04:40
376	02:05:00
377	02:05:20
378	02:05:40
379	02:06:00
380	02:06:20
381	02:06:40
382	02:07:00
383	02:07:20
384	02:07:40
385	02:08:00
386	02:08:20
387	02:08:40
388	02:09:00
389	02:09:20
390	02:09:40
391	02:10:00
392	02:10:20
393	02:10:40
394	02:11:00
395	02:11:20
396	02:11:40
397	02:12:00
398	02:12:20
399	02:12:40
400	02:13:00
401	02:13:20
402	02:13:40
403	02:14:00
404	02:14:20

## Sheet: Alltracks_tog
	Time	Centrin	Track1	Track2	Track3	Track4	Track5	Track6	Track7	Track8	Track9	Track10	phagocytic events
1	00:00:00	7.6564	14.0185
2	00:00:20	6.97817	13.506
3	00:00:40	7.77756	14.3666
4	00:01:00	8.02823	13.1825
5	00:01:20	8.10082	13.0187
6	00:01:40	8.49701	13.1348
7	00:02:00	8.35135	13.0783
8	00:02:20	8.11022	13.0037
9	00:02:40	8.36487	13.2423
10	00:03:00	8.86252	13.081
11	00:03:20	8.84293	12.9471
12	00:03:40	7.78172	12.937
13	00:04:00	7.48339	12.9047
14	00:04:20	7.43193	13.1207
15	00:04:40	7.66733	13.2157
16	00:05:00	6.8074	12.9919
17	00:05:20	6.64243	12.9429
18	00:05:40	6.31675	12.8657
19	00:06:00	7.12055	13.0869
20	00:06:20	6.3787	13.2878
21	00:06:40	7.67414	13.0422
22	00:07:00	7.20569	12.4965
23	00:07:20	7.93035	12.9423
24	00:07:40	7.76966	12.72
25	00:08:00	8.11669	12.3463
26	00:08:20	7.94052	12.4808
27	00:08:40	8.81955	12.0297
28	00:09:00	8.95833	11.837
29	00:09:20	9.40515	12.0724
30	00:09:40	9.8787	12.2051
31	00:10:00	11.8004	12.272
32	00:10:20	10.9916	12.1835
33	00:10:40	10.5592	12.7037
34	00:11:00	11.3265
35	00:11:20	13.3774
36	00:11:40	15.6195
37	00:12:00	18.9946
38	00:12:20	20.8395
39	00:12:40	20.7979
40	00:13:00	19.6471
41	00:13:20	21.4258
42	00:13:40	22.6162											1
43	00:14:00	21.1424
44	00:14:20	21.2501		25.5653
45	00:14:40	21.6529		25.5528
46	00:15:00	21.2829		25.4803
47	00:15:20	20.7259		25.1491
48	00:15:40	20.8096		24.7351
49	00:16:00	21.0715		24.5962
50	00:16:20	18.7321		23.6363
51	00:16:40	18.5654		23.6277
52	00:17:00	18.175		23.2488
53	00:17:20	17.7591		22.4783
54	00:17:40	17.5254		21.7453
55	00:18:00	16.3693		21.6129
56	00:18:20	16.2877		21.7122
57	00:18:40	15.7988		20.7558
58	00:19:00	16.3282		20.4378
59	00:19:20	14.9598		20.2091
60	00:19:40	13.8923		20.5603
61	00:20:00	12.1632		20.3168
62	00:20:20	12.4845		20.2353
63	00:20:40	12.0316		20.2862
64	00:21:00	11.4277		20.2936
65	00:21:20	12.0216		20.3636
66	00:21:40	11.8126		19.6368
67	00:22:00	11.8369		19.4628
68	00:22:20	12.3859		19.3725
69	00:22:40	13.5821		19.3258
70	00:23:00	12.8504		19.7852
71	00:23:20	11.4506		19.5907
72	00:23:40	12.1766		19.7369
73	00:24:00	13.7519		19.7938
74	00:24:20	13.9168		19.678
75	00:24:40	12.0766		19.1995
76	00:25:00	10.494		18.8744
77	00:25:20	11.2878		19.3956
78	00:25:40	11.7715		19.4723
79	00:26:00	9.39921		20.163
80	00:26:20	8.05421		19.8216
81	00:26:40	7.17779		19.7973
82	00:27:00	7.714		19.9145
83	00:27:20	7.02381		19.5422
84	00:27:40	6.35019		18.7408
85	00:28:00	6.43867		18.4324
86	00:28:20	6.66154		18.3724
87	00:28:40	9.51228		17.1886
88	00:29:00	13.0114		17.1399
89	00:29:20	14.5195		17.1052
90	00:29:40	14.3269		17.186
91	00:30:00	15.2187		17.0473
92	00:30:20	14.7792		16.6352
93	00:30:40	13.6833		16.4625									1
94	00:31:00	14.7034		15.9476
95	00:31:20	14.2812		15.5047
96	00:31:40	14.2721		14.7261	17.3689
97	00:32:00	14.4736		14.5416	16.4947
98	00:32:20	11.3681		12.8873	16.7406
99	00:32:40	9.44919		9.35697	15.3072
100	00:33:00	7.72258		7.82177	15.3228
101	00:33:20	6.9588		7.40727	15.3334
102	00:33:40	8.73998		7.7565	15.4285
103	00:34:00	8.16731		7.21774	14.5735
104	00:34:20	7.9909		6.44817	13.5432
105	00:34:40	8.04609		6.48614	12.738
106	00:35:00	8.36598		6.56589	13.019
107	00:35:20	8.67245		6.61186	12.3949
108	00:35:40	8.1234		6.08283	12.0293
109	00:36:00	7.65023		5.68359	12.4939
110	00:36:20	7.1846		6.08784	11.9425
111	00:36:40	8.70502		6.39835	12.1
112	00:37:00	7.56769		6.37943	13.0499
113	00:37:20	7.22197		6.44469	12.6097
114	00:37:40	7.9549		6.52398	12.86
115	00:38:00	7.73535		6.19326	13.3503
116	00:38:20	8.21841		6.31133	13.4445
117	00:38:40	7.81649		7.04398	13.527
118	00:39:00	8.12266		6.76819	13.4927
119	00:39:20	7.41513		6.78223	13.1737
120	00:39:40	6.9169		6.6915	13.0189
121	00:40:00	6.31052		6.48607	12.4076
122	00:40:20	6.64347		6.56332	12.629
123	00:40:40	6.26868		7.2099	12.0486
124	00:41:00	6.62192		6.38091	12.1317
125	00:41:20	6.5047		5.74198	11.2144
126	00:41:40	7.18413		6.50265	9.89541
127	00:42:00	8.79168		6.43937	8.42054
128	00:42:20	7.74682			8.34384
129	00:42:40	7.83815			7.7396
130	00:43:00	8.31337			7.41482
131	00:43:20	6.21323			7.36366
132	00:43:40	6.0443			7.18502
133	00:44:00	8.35391			7.6727
134	00:44:20	7.70036			7.12861
135	00:44:40	7.57317			7.11476
136	00:45:00	7.16363			6.89734
137	00:45:20	7.07519			6.3143
138	00:45:40	5.98833			7.00531
139	00:46:00	9.38394			6.10238
140	00:46:20	12.194			5.94904
141	00:46:40	13.8932			6.39103
142	00:47:00	14.5107			5.73322
143	00:47:20	12.1162			5.48698
144	00:47:40	13.3475			4.80912
145	00:48:00	15.8927			4.8927	21.6741
146	00:48:20	18.5746			4.40312	22.0484							1
147	00:48:40	15.9752			4.39292	21.8
148	00:49:00	13.3132			4.21719	22.0674
149	00:49:20	11.7205			4.60039	21.9716
150	00:49:40	9.66523			4.18244	21.9538
151	00:50:00	6.29838			4.36012	22.6979
152	00:50:20	5.99363			4.22527	22.4322
153	00:50:40	5.76695			4.75949	22.1326
154	00:51:00	5.79268			4.38162	22.2379
155	00:51:20	6.23472			4.3611	22.6024
156	00:51:40	5.94673			4.39388	22.6126
157	00:52:00	5.91851			5.21827	22.7251
158	00:52:20	6.07045			5.41877	22.7272
159	00:52:40	6.10777			4.31144	22.7158
160	00:53:00	5.02144			4.4275	22.4803
161	00:53:20	5.68639			5.02264	22.8904
162	00:53:40	5.30859				22.67
163	00:54:00	5.27809				22.67
164	00:54:20	4.76979				23.0065
165	00:54:40	5.51991				23.1512
166	00:55:00	5.40499				22.959
167	00:55:20	5.3286				22.8967
168	00:55:40	5.62666				22.8424
169	00:56:00	5.23991				22.9536
170	00:56:20	5.84744				22.8925
171	00:56:40	5.53239				22.6159
172	00:57:00	5.15924				21.8075
173	00:57:20	5.58243				21.5906
174	00:57:40	5.76375				21.4074
175	00:58:00	7.00114				19.617
176	00:58:20	6.88355				18.694
177	00:58:40	7.08942				17.9155
178	00:59:00	7.29413				16.2875
179	00:59:20	6.2225				15.664
180	00:59:40	7.00114				13.8638
181	01:00:00	6.72637				8.42521
182	01:00:20	5.70446				7.17718							1
183	01:00:40	6.01479				6.93994
184	01:01:00	6.58834				7.10936	11.2996
185	01:01:20	6.58834				7.31415	11.2953
186	01:01:40	6.80238				6.56805	10.414
187	01:02:00	6.32073				6.76834	9.78828
188	01:02:20	6.04408				6.40159	9.99827
189	01:02:40	5.18413				6.97332	8.7795
190	01:03:00	5.57341				6.40889	8.74267
191	01:03:20	5.87372				6.05619	9.41416
192	01:03:40	5.42505				5.94428	9.21718
193	01:04:00	5.25652				6.42583	8.19556
194	01:04:20	5.60337				6.12514	9.29236
195	01:04:40	5.46328				6.1907	8.94753
196	01:05:00	5.81897				5.96086	9.16936
197	01:05:20	6.78857				5.00541	8.59118
198	01:05:40	6.241					8.82437
199	01:06:00	6.35354					9.50237
200	01:06:20	6.71436					9.30243
201	01:06:40	8.13248					8.34847
202	01:07:00	7.61838					8.65397
203	01:07:20	8.22586					7.72217
204	01:07:40	8.3299					7.72217
205	01:08:00	9.99168					7.72217
206	01:08:20	11.4064					8.13641
207	01:08:40	12.5476					7.05008
208	01:09:00	14.3041					7.57562
209	01:09:20	12.3048					7.71215
210	01:09:40	12.314					7.82493
211	01:10:00	12.096					7.38646
212	01:10:20	11.7946					7.38322
213	01:10:40	11.6802					7.68218
214	01:11:00	11.3257					7.21039
215	01:11:20	12.1766					8.11876						1
216	01:11:40	12.1381					8.15514	18.3881
217	01:12:00	10.706					7.49581	17.8674
218	01:12:20	9.94939					7.17089	17.791
219	01:12:40	10.0502					6.94292	18.1523
220	01:13:00	11.0609					6.80139	17.6669
221	01:13:20	11.2812					7.05952	17.2717
222	01:13:40	9.79827					6.67671	17.0366
223	01:14:00	10.1766					5.82487	17.1972
224	01:14:20	10.2301					7.42688	17.9638
225	01:14:40	8.63398					6.28451	17.4696
226	01:15:00	9.91327					6.66607	17.4479
227	01:15:20	9.47557					6.97043	17.1252
228	01:15:40	9.45431					7.42205	17.4551
229	01:16:00	9.97971					6.71467	17.5031
230	01:16:20	9.69448					7.35405	17.4536
231	01:16:40	9.29074					7.40066	17.6451
232	01:17:00	10.1908					6.97043	17.5697
233	01:17:20	9.92021					6.93818	17.3831
234	01:17:40	9.97971					6.8037	17.0218
235	01:18:00	9.63672					7.36055	17.2509
236	01:18:20	9.74564					7.04637	16.8158
237	01:18:40	10.3766					7.92794	16.7758
238	01:19:00	9.07766					6.611	16.5796
239	01:19:20	8.54521					7.28214	16.7355
240	01:19:40	9.34593					7.84909	17.1931
241	01:20:00	9.57166					7.6265	16.6361
242	01:20:20	10.3573					7.39385	17.0576
243	01:20:40	10.304					7.74504	16.5719
244	01:21:00	9.37295					7.01905	16.5101
245	01:21:20	9.59086					7.26287	17.0206
246	01:21:40	8.38234					6.43125	17.0121
247	01:22:00	8.85427					6.22156	16.7487
248	01:22:20	9.13087					6.6664	16.9215
249	01:22:40	8.57322					6.62094	16.9934
250	01:23:00	8.20247					7.21779	17.0162
251	01:23:20	7.8172					6.33333	16.7691
252	01:23:40	6.57097					6.07959	17.1556
253	01:24:00	6.05042					5.70505	16.9934
254	01:24:20	5.55876					6.86757	17.4261
255	01:24:40	5.5738					5.86325	17.4037
256	01:25:00	6.07755					6.63042	17.7712
257	01:25:20	6.10161					5.93172	17.2895
258	01:25:40	6.17641					5.58243	17.1275
259	01:26:00	8.28797					6.30178	16.9379
260	01:26:20	5.79134					5.36023	16.6521
261	01:26:40	5.43267					5.28608	16.1087
262	01:27:00	5.43441						16.135
263	01:27:20	5.84735						15.7352					1
264	01:27:40	5.73583						15.2208	9.14466
265	01:28:00	5.15832						15.171	8.41337
266	01:28:20	5.03274						14.9855	8.11277
267	01:28:40	5.46895						14.6446	7.97784
268	01:29:00	5.67171						14.6248	7.71011
269	01:29:20	4.60442						14.3058	6.72885
270	01:29:40	4.91613						14.1997	5.94906
271	01:30:00	5.20162						13.5484	6.28302
272	01:30:20	6.08621						14.5553	6.29345
273	01:30:40	5.03962						14.2062	6.34645
274	01:31:00	6.12932						15.2763	5.60856
275	01:31:20	5.18088						14.536	5.25652
276	01:31:40	4.94704						14.8782	5.73374
277	01:32:00	5.18146						14.6005	6.37418
278	01:32:20	5.12635						14.7855	6.11366
279	01:32:40	5.29167						14.6348	6.19142
280	01:33:00	6.55002						14.5275	6.37482
281	01:33:20	5.79579						14.2396	5.93545
282	01:33:40	5.05991						14.8211	5.7694
283	01:34:00	5.77357						14.8522	5.63485
284	01:34:20	5.91883						14.406	6.07016
285	01:34:40	5.21404						14.0554	5.88191
286	01:35:00	5.92248						14.7511	5.83997
287	01:35:20	5.30738						14.5786	5.52693
288	01:35:40	5.73262						14.1792	5.80557
289	01:36:00	5.49561						13.9188	6.13863
290	01:36:20	5.15592						14.1871	6.13289
291	01:36:40	5.71948						14.3147	6.27592
292	01:37:00	5.57922						13.7273	5.89552
293	01:37:20	6.49327						14.174	5.96761
294	01:37:40	7.57288						13.7392	5.62506
295	01:38:00	7.59181						13.3101	5.45395
296	01:38:20	7.04331						12.3783	5.81792
297	01:38:40	6.0691						12.2951	5.91902
298	01:39:00	5.73575						11.3543	5.78753
299	01:39:20	4.78021						11.5791	5.45088
300	01:39:40	5.47653						11.3502	5.64682
301	01:40:00	5.61457						11.0998	5.69134
302	01:40:20	5.01586						11.1288	5.7301
303	01:40:40	5.29836						10.5157	5.67978
304	01:41:00	5.95269						9.85275	5.91599
305	01:41:20	5.99125						10.095	5.86726
306	01:41:40	5.98975						10.3312	5.48893
307	01:42:00	6.68158						10.2712	5.54432
308	01:42:20	6.03093						10.2086	5.28238
309	01:42:40	5.14024						9.77438	5.24717
310	01:43:00	5.27561						8.83947	5.69134
311	01:43:20	5.15548						8.97526	5.42329
312	01:43:40	5.13607						8.736	4.76558
313	01:44:00	5.67315						7.59114	5.95299
314	01:44:20	4.59497						7.59678	5.26237
315	01:44:40	4.94709						7.61213	4.96529
316	01:45:00	4.99672						7.58587	5.08673
317	01:45:20	5.27052						7.25036	5.37698
318	01:45:40	5.36947						6.4795	5.88341
319	01:46:00	6.43421						6.80564	6.18221
320	01:46:20	6.28588						6.37941	6.15978
321	01:46:40	5.99592						6.5585	5.50708
322	01:47:00	5.47471						6.816	5.31606
323	01:47:20	5.73317							5.31606
324	01:47:40	5.66934							5.4168
325	01:48:00	5.71619							4.66655
326	01:48:20	5.52656							4.81784
327	01:48:40	5.33692							5.27684				1
328	01:49:00	6.07249							5.96044
329	01:49:20	5.60504							6.16548	8.5126
330	01:49:40	5.208							5.83401	9.23938
331	01:50:00	5.31188							5.43703	8.40604
332	01:50:20	5.73519							5.19689	8.57862			1
333	01:50:40	4.7323							4.92458	7.43205
334	01:51:00	5.91131							4.88124	8.05559
335	01:51:20	5.93846							4.83584	7.64728
336	01:51:40	6.36663							5.01061	7.96229	12.5105
337	01:52:00	6.87248							5.74522	7.65262	11.7488
338	01:52:20	6.40971							5.33332	7.39127	11.2952
339	01:52:40	7.16109							5.21052	7.58212	10.8959
340	01:53:00	7.46307							5.16136	7.32186	10.1457
341	01:53:20	8.07376							5.68909	6.30197	10.1387
342	01:53:40	8.14182							5.7963	5.48571	10.1814
343	01:54:00	9.11382							5.96679	5.28948	9.81886
344	01:54:20	7.44322							6.02439	5.45935	10.0222
345	01:54:40	5.87233							6.32954	5.47964	8.85297
346	01:55:00	6.51793							6.75333	5.49601	7.48421
347	01:55:20	5.87558							6.26742	5.03301	6.88324
348	01:55:40	5.68701							6.1508	4.54832
349	01:56:00	5.03568							5.95282	4.65247
350	01:56:20	5.75932							6.09454	4.90826
351	01:56:40	6.27262							6.00569	6.06208
352	01:57:00	6.57363							6.10288	6.08041			1
353	01:57:20	5.39653							6.04209	4.82598
354	01:57:40	5.84765							5.72099	5.05014		13.0812
355	01:58:00	5.26239							5.93215	5.21896		12.9481
356	01:58:20	5.26439							5.26921	5.06056		10.9416
357	01:58:40	5.13101							5.31605	5.01147		10.1936
358	01:59:00	5.77228							5.49841	4.54631		10.4629
359	01:59:20	6.26711								4.68643		10.1011
360	01:59:40	5.57808								4.87132		8.2568
361	02:00:00	6.37278								4.65998		7.25429
362	02:00:20	5.35649								5.66902		5.56406
363	02:00:40	5.44311								5.17003		5.54907
364	02:01:00	4.84872								4.73602		5.63459
365	02:01:20	5.00709								4.21614		5.76419
366	02:01:40	5.66866								4.46105		5.65359
367	02:02:00	4.4812								4.93678		5.76757
368	02:02:20	3.97953								4.80444		5.36506
369	02:02:40	4.81496								4.23992		4.88961
370	02:03:00	5.53266								4.51116		4.83275
371	02:03:20	5.72436								4.53227		5.37075
372	02:03:40	5.59654								5.34653		5.02286
373	02:04:00	5.85306								4.43095		5.01654
374	02:04:20	5.26189								5.06229		4.73637
375	02:04:40	5.34448								4.40586		4.85869
376	02:05:00	5.14659								4.74185		4.87908
377	02:05:20	5.02934								4.93089		5.00891
378	02:05:40	5.3259								4.26856		4.99318
379	02:06:00	6.06144								4.649		5.7368
380	02:06:20	5.20956								5.54455		5.23231
381	02:06:40	5.28834								5.02979		4.90992
382	02:07:00	5.24822								4.51276		5.36158
383	02:07:20	5.78011								3.82902		4.70939
384	02:07:40	5.66184								4.45952		4.73442
385	02:08:00	6.11931								4.11185		4.8791
386	02:08:20	5.93258								4.33883		4.78081
387	02:08:40	5.79178								3.98259		4.78178
388	02:09:00	6.64493								4.37165		5.38653
389	02:09:20	6.80193								4.38492		4.98808
390	02:09:40	6.07151								3.79895		4.76285
391	02:10:00	5.91647								4.17629		4.35865
392	02:10:20	6.26532								4.26062		4.99977
393	02:10:40	6.65355								4.19147		4.65775
394	02:11:00	6.40464								3.81373		4.68435
395	02:11:20	6.75296								5.0637		4.97467
396	02:11:40	7.20135								4.87868		4.92444
397	02:12:00	7.46148								5.20754		5.53186
398	02:12:20	7.13991								5.03633		5.05598
399	02:12:40	7.1361								4.95873		4.98952
400	02:13:00	7.31213								4.75961		4.60851
401	02:13:20	5.56268								4.61858		4.39223
402	02:13:40	5.6922								4.25853		4.94218
403	02:14:00	4.71728								4.01069		4.23271
404	02:14:20	5.74404								4.25593		4.9345

## Sheet: Centrin_cups
		Formula to calculate distances between 2 points in 3D
		Cups			Cell body			distance in units			distance in um
Timepoint	Time	X1	Y2	Z2	X2	Y2	Z2	dX	dY	dZ	dX (0.116)	dY (0.116)	dZ (0.5um)	Distance = SQRT(dX^2 + dY^2 + dZ^2)										X	Y	Z	TP	Closest prox
1	00:00:00				220.833	161.5	25	220.833	161.5	25	25.6167	18.734	12.5	34.109				1	C2-Cell_1:Cell1--C01--T00041.tif:5	0	563	563	563	0.5	310.5	4	42	1
2	00:00:20				224.167	175.5	25	224.167	175.5	25	26.0033	20.358	12.5	35.3111				2	C2-Cell_1:Cell1--C01--T00093.tif:40	0	524	524	524	198	328.5	40	94	-3
3	00:00:40				223.5	178.833	29	223.5	178.833	29	25.926	20.7447	14.5	36.2319				3	C2-Cell_1:Cell1--C01--T00144.tif:21	0	482	482	482	7.5	226.5	21	145	-3
4	00:01:00				220.833	178.833	28	220.833	178.833	28	25.6167	20.7447	14	35.8128				4	C2-Cell_1:Cell1--C01--T00181.tif:36	0	426	426	426	166.5	248	36	182	-3
5	00:01:20				223.5	176.833	29	223.5	176.833	29	25.926	20.5127	14.5	36.0995				5	C2-Cell_1:Cell1--C01--T00214.tif:21	0	422	422	422	167	312.5	21	215
6	00:01:40				222.833	174.167	29	222.833	174.167	29	25.8487	20.2033	14.5	35.8689				6	C2-Cell_1:Cell1--C01--T00262.tif:9	0	378	378	378	185.5	144	9	263	-1
7	00:02:00				228.167	174.167	29	228.167	174.167	29	26.4673	20.2033	14.5	36.3173				7	C2-Cell_1:Cell1--C01--T00325.tif:37	0	362	362	362	214	225	37	326	1
8	00:02:20				225.5	174.167	28	225.5	174.167	28	26.158	20.2033	14	35.8945				8	C2-Cell_1:Cell1--C01--T00332.tif:26	0	318	318	318	112	185.5	26	333	2
9	00:02:40				224.833	173.5	28	224.833	173.5	28	26.0807	20.126	14	35.7947				9	C2-Cell_1:Cell1--C01--T00349.tif:24	0	346	346	346	111	176	24	350	-1
10	00:03:00				225.5	176.167	28	225.5	176.167	28	26.158	20.4353	14	36.0256
11	00:03:20				225.5	177.5	29	225.5	177.5	29	26.158	20.59	14.5	36.3103
12	00:03:40				224.833	178.167	29	224.833	178.167	29	26.0807	20.6673	14.5	36.2986
13	00:04:00				223.5	178.833	28	223.5	178.833	28	25.926	20.7447	14	36.0347
14	00:04:20				224.833	181.5	27	224.833	181.5	27	26.0807	21.054	13.5	36.1348						-3	3
15	00:04:40				222.833	182.167	27	222.833	182.167	27	25.8487	21.1313	13.5	36.013						-2	0
16	00:05:00				222.833	184.167	27	222.833	184.167	27	25.8487	21.3633	13.5	36.1496						-1	2
17	00:05:20				219.5	183.5	26	219.5	183.5	26	25.462	21.286	13	35.6428					00:00:00	0	0
18	00:05:40				216.833	184.833	26	216.833	184.833	26	25.1527	21.4407	13	35.5156					00:00:20	1	1
19	00:06:00				218.167	185.5	26	218.167	185.5	26	25.3073	21.518	13	35.6719					00:00:40	2	1
20	00:06:20				214.833	186.833	27	214.833	186.833	27	24.9207	21.6727	13.5	35.679					00:01:00	3	0
21	00:06:40				215.5	188.833	26	215.5	188.833	26	24.998	21.9047	13	35.6891
22	00:07:00				212.167	191.5	25	212.167	191.5	25	24.6113	22.214	12.5	35.432
23	00:07:20				212.167	188.833	26	212.167	188.833	26	24.6113	21.9047	13	35.4194
24	00:07:40				214.833	190.833	26	214.833	190.833	26	24.9207	22.1367	13	35.7781
25	00:08:00				214.167	191.5	25	214.167	191.5	25	24.8433	22.214	12.5	35.5936
26	00:08:20				212.833	194.167	26	212.833	194.167	26	24.6887	22.5233	13	35.8585
27	00:08:40				208.833	193.5	25	208.833	193.5	25	24.2247	22.446	12.5	35.3116
28	00:09:00				209.5	194.833	25	209.5	194.833	25	24.302	22.6007	12.5	35.463
29	00:09:20				208.833	194.833	25	208.833	194.833	25	24.2247	22.6007	12.5	35.4101
30	00:09:40				208.167	194.833	25	208.167	194.833	25	24.1473	22.6007	12.5	35.3572
31	00:10:00				207.5	197.5	26	207.5	197.5	26	24.07	22.91	13	35.6824
32	00:10:20				208.167	197.5	25	208.167	197.5	25	24.1473	22.91	12.5	35.5558
33	00:10:40				208.167	194.167	26	208.167	194.167	26	24.1473	22.5233	13	35.4879
34	00:11:00	0.5	310.5	4	206.833	196.833	26	206.333	-113.667	22	23.9347	-13.1853	11	29.4571	-8
35	00:11:20	0.5	310.5	4	204.167	198.167	26	203.667	-112.333	22	23.6253	-13.0307	11	29.1368	-7
36	00:11:40	0.5	310.5	4	204.167	196.167	25	203.667	-114.333	21	23.6253	-13.2627	10.5	29.0569	-6
37	00:12:00	0.5	310.5	4	203.5	200.167	24	203	-110.333	20	23.548	-12.7987	10	28.6062	-5
38	00:12:20	0.5	310.5	4	202.167	203.5	25	201.667	-107	21	23.3933	-12.412	10.5	28.4878	-4
39	00:12:40	0.5	310.5	4	199.5	200.167	23	199	-110.333	19	23.084	-12.7987	9.5	28.0522	-3
40	00:13:00	0.5	310.5	4	196.167	200.833	23	195.667	-109.667	19	22.6973	-12.7213	9.5	27.6993	-2
41	00:13:20	0.5	310.5	4	196.167	200.833	22	195.667	-109.667	18	22.6973	-12.7213	9	27.5318	-1
42	00:13:40	0.5	310.5	4	193.5	201.5	21	193	-109	17	22.388	-12.644	8.5	27.0803	0
43	00:14:00	0.5	310.5	4	186.167	206.833	19	185.667	-103.667	15	21.5373	-12.0253	7.5	25.7821	1
44	00:14:20	0.5	310.5	4	188.833	206.167	19	188.333	-104.333	15	21.8467	-12.1027	7.5	26.0768	2
45	00:14:40	0.5	310.5	4	188.833	203.5	19	188.333	-107	15	21.8467	-12.412	7.5	26.2218	3
46	00:15:00	0.5	310.5	4	192.167	203.5	22	191.667	-107	18	22.2333	-12.412	9	27.007	4
47	00:15:20	0.5	310.5	4	192.167	204.833	22	191.667	-105.667	18	22.2333	-12.2573	9	26.9363	5
48	00:15:40	0.5	310.5	4	192.833	202.833	21	192.333	-107.667	17	22.3107	-12.4893	8.5	26.9444	6
49	00:16:00	0.5	310.5	4	195.5	198.833	22	195	-111.667	18	22.62	-12.9533	9	27.5763	7
50	00:16:20	0.5	310.5	4	194.833	201.5	21	194.333	-109	17	22.5427	-12.644	8.5	27.2083	8
51	00:16:40				194.167	201.5	22	194.167	201.5	22	22.5233	23.374	11	34.2731
52	00:17:00				193.5	202.167	22	193.5	202.167	22	22.446	23.4513	11	34.2752
53	00:17:20				192.833	203.5	22	192.833	203.5	22	22.3687	23.606	11	34.3308
54	00:17:40				196.167	203.5	22	196.167	203.5	22	22.7553	23.606	11	34.5839
55	00:18:00				197.5	200.833	22	197.5	200.833	22	22.91	23.2967	11	34.4761
56	00:18:20				200.167	203.5	22	200.167	203.5	22	23.2193	23.606	11	34.891
57	00:18:40				199.5	201.5	22	199.5	201.5	22	23.142	23.374	11	34.6828
58	00:19:00				199.5	201.5	22	199.5	201.5	22	23.142	23.374	11	34.6828
59	00:19:20				198.167	201.5	23	198.167	201.5	23	22.9873	23.374	11.5	34.7421
60	00:19:40				200.167	202.833	23	200.167	202.833	23	23.2193	23.5287	11.5	34.9998
61	00:20:00				198.167	200.833	23	198.167	200.833	23	22.9873	23.2967	11.5	34.6901
62	00:20:20				200.167	200.833	23	200.167	200.833	23	23.2193	23.2967	11.5	34.8443
63	00:20:40				200.167	200.833	23	200.167	200.833	23	23.2193	23.2967	11.5	34.8443
64	00:21:00				200.167	198.833	23	200.167	198.833	23	23.2193	23.0647	11.5	34.6896
65	00:21:20				202.167	196.833	23	202.167	196.833	23	23.4513	22.8327	11.5	34.6922
66	00:21:40				197.5	197.5	22	197.5	197.5	22	22.91	22.91	11	34.216
67	00:22:00				198.833	198.833	22	198.833	198.833	22	23.0647	23.0647	11	34.4232
68	00:22:20				196.833	199.5	23	196.833	199.5	23	22.8327	23.142	11.5	34.4838
69	00:22:40				196.833	198.833	22	196.833	198.833	22	22.8327	23.0647	11	34.2682
70	00:23:00				198.833	201.5	23	198.833	201.5	23	23.0647	23.374	11.5	34.7933
71	00:23:20				197.5	198.167	22	197.5	198.167	22	22.91	22.9873	11	34.2679
72	00:23:40				197.5	198.167	22	197.5	198.167	22	22.91	22.9873	11	34.2679
73	00:24:00				197.5	200.833	24	197.5	200.833	24	22.91	23.2967	12	34.8081
74	00:24:20				198.167	198.833	23	198.167	198.833	23	22.9873	23.0647	11.5	34.5347
75	00:24:40				197.5	198.167	22	197.5	198.167	22	22.91	22.9873	11	34.2679
76	00:25:00				196.167	200.833	23	196.167	200.833	23	22.7553	23.2967	11.5	34.5368
77	00:25:20				196.167	200.833	23	196.167	200.833	23	22.7553	23.2967	11.5	34.5368
78	00:25:40				196.167	200.833	22	196.167	200.833	22	22.7553	23.2967	11	34.3735
79	00:26:00				198.833	199.5	23	198.833	199.5	23	23.0647	23.142	11.5	34.6379
80	00:26:20				199.5	197.5	22	199.5	197.5	22	23.142	22.91	11	34.3718
81	00:26:40				198.833	198.167	23	198.833	198.167	23	23.0647	22.9873	11.5	34.5347
82	00:27:00				198.167	202.167	24	198.167	202.167	24	22.9873	23.4513	12	34.9626
83	00:27:20				198.167	198.833	23	198.167	198.833	23	22.9873	23.0647	11.5	34.5347
84	00:27:40				197.5	201.5	23	197.5	201.5	23	22.91	23.374	11.5	34.6909
85	00:28:00				195.5	202.833	23	195.5	202.833	23	22.678	23.5287	11.5	34.643
86	00:28:20	198	328.5	40	196.833	204.167	23	-1.16667	-124.333	-17	-0.135333	-14.4227	-8.5	16.7416	-8
87	00:28:40	198	328.5	40	191.5	207.5	22	-6.5	-121	-18	-0.754	-14.036	-9	16.6907	-7
88	00:29:00	198	328.5	40	192.833	205.5	22	-5.16667	-123	-18	-0.599333	-14.268	-9	16.88	-6
89	00:29:20	198	328.5	40	192.833	204.167	23	-5.16667	-124.333	-17	-0.599333	-14.4227	-8.5	16.7518	-5
90	00:29:40	198	328.5	40	196.167	206.167	23	-1.83333	-122.333	-17	-0.212667	-14.1907	-8.5	16.543	-4
91	00:30:00	198	328.5	40	198.167	208.167	23	0.166667	-120.333	-17	0.0193333	-13.9587	-8.5	16.343	-3
92	00:30:20	198	328.5	40	195.5	206.833	23	-2.5	-121.667	-17	-0.29	-14.1133	-8.5	16.4779	-2
93	00:30:40	198	328.5	40	196.167	204.833	22	-1.83333	-123.667	-18	-0.212667	-14.3453	-9	16.9362	-1
94	00:31:00	198	328.5	40	197.5	207.5	22	-0.5	-121	-18	-0.058	-14.036	-9	16.6737	0
95	00:31:20	198	328.5	40	197.5	208.167	23	-0.5	-120.333	-17	-0.058	-13.9587	-8.5	16.3431	1
96	00:31:40	198	328.5	40	197.5	207.5	22	-0.5	-121	-18	-0.058	-14.036	-9	16.6737	2
97	00:32:00	198	328.5	40	196.833	206.833	23	-1.16667	-121.667	-17	-0.135333	-14.1133	-8.5	16.4759	3
98	00:32:20	198	328.5	40	196.833	210.833	21	-1.16667	-117.667	-19	-0.135333	-13.6493	-9.5	16.6305	4
99	00:32:40	198	328.5	40	200.833	209.5	25	2.83333	-119	-15	0.328667	-13.804	-7.5	15.7133	5
100	00:33:00	198	328.5	40	200.833	209.5	24	2.83333	-119	-16	0.328667	-13.804	-8	15.958	6
101	00:33:20	198	328.5	40	201.5	209.5	24	3.5	-119	-16	0.406	-13.804	-8	15.9598	7
102	00:33:40	198	328.5	40	204.833	206.167	24	6.83333	-122.333	-16	0.792667	-14.1907	-8	16.3096	8
103	00:34:00				203.5	207.5	24	203.5	207.5	24	23.606	24.07	12	35.7856
104	00:34:20				203.5	212.833	26	203.5	212.833	26	23.606	24.6887	13	36.5482
105	00:34:40				207.5	212.833	26	207.5	212.833	26	24.07	24.6887	13	36.8496
106	00:35:00				208.833	214.833	25	208.833	214.833	25	24.2247	24.9207	12.5	36.9341
107	00:35:20				206.833	212.167	26	206.833	212.167	26	23.9927	24.6113	13	36.7473
108	00:35:40				206.833	212.167	25	206.833	212.167	25	23.9927	24.6113	12.5	36.5734
109	00:36:00				206.833	208.167	25	206.833	208.167	25	23.9927	24.1473	12.5	36.2628
110	00:36:20				208.167	211.5	25	208.167	211.5	25	24.1473	24.534	12.5	36.6232
111	00:36:40				208.167	208.167	25	208.167	208.167	25	24.1473	24.1473	12.5	36.3653
112	00:37:00				209.5	208.167	24	209.5	208.167	24	24.302	24.1473	12	36.2999
113	00:37:20				212.167	210.833	24	212.167	210.833	24	24.6113	24.4567	12	36.713
114	00:37:40				210.833	209.5	25	210.833	209.5	25	24.4567	24.302	12.5	36.6738
115	00:38:00				206.833	208.167	25	206.833	208.167	25	23.9927	24.1473	12.5	36.2628
116	00:38:20				208.833	208.167	24	208.833	208.167	24	24.2247	24.1473	12	36.2481
117	00:38:40				207.5	207.5	25	207.5	207.5	25	24.07	24.07	12.5	36.2627
118	00:39:00				207.5	207.5	25	207.5	207.5	25	24.07	24.07	12.5	36.2627
119	00:39:20				206.167	206.833	25	206.167	206.833	25	23.9153	23.9927	12.5	36.1087
120	00:39:40				204.167	207.5	25	204.167	207.5	25	23.6833	24.07	12.5	36.0072
121	00:40:00				203.5	208.167	24	203.5	208.167	24	23.606	24.1473	12	35.8376
122	00:40:20				202.833	207.5	25	202.833	207.5	25	23.5287	24.07	12.5	35.9056
123	00:40:40				201.5	209.5	25	201.5	209.5	25	23.374	24.302	12.5	35.9608
124	00:41:00				202.167	206.833	24	202.167	206.833	24	23.4513	23.9927	12	35.6316
125	00:41:20				202.167	210.167	24	202.167	210.167	24	23.4513	24.3793	12	35.8931
126	00:41:40				201.5	206.833	24	201.5	206.833	24	23.374	23.9927	12	35.5808
127	00:42:00				203.5	207.5	24	203.5	207.5	24	23.606	24.07	12	35.7856
128	00:42:20				200.833	202.167	24	200.833	202.167	24	23.2967	23.4513	12	35.1667
129	00:42:40				198.833	206.167	23	198.833	206.167	23	23.0647	23.9153	11.5	35.1592
130	00:43:00				200.833	206.833	24	200.833	206.833	24	23.2967	23.9927	12	35.53
131	00:43:20				201.5	206.833	24	201.5	206.833	24	23.374	23.9927	12	35.5808
132	00:43:40				200.833	207.5	23	200.833	207.5	23	23.2967	24.07	11.5	35.4168
133	00:44:00				202.167	204.833	24	202.167	204.833	24	23.4513	23.7607	12	35.4758
134	00:44:20				199.5	204.833	23	199.5	204.833	23	23.142	23.7607	11.5	35.1051
135	00:44:40				197.5	203.5	23	197.5	203.5	23	22.91	23.606	11.5	34.8477
136	00:45:00				197.5	203.5	24	197.5	203.5	24	22.91	23.606	12	35.0159
137	00:45:20				201.5	204.833	24	201.5	204.833	24	23.374	23.7607	12	35.4248
138	00:45:40	7.5	226.5	21	198.833	199.5	24	191.333	-27	3	22.1947	-3.132	1.5	22.4647	-8
139	00:46:00	7.5	226.5	21	200.167	204.833	24	192.667	-21.6667	3	22.3493	-2.51333	1.5	22.5402	-7
140	00:46:20	7.5	226.5	21	197.5	208.833	24	190	-17.6667	3	22.04	-2.04933	1.5	22.1858	-6
141	00:46:40	7.5	226.5	21	193.5	204.833	24	186	-21.6667	3	21.576	-2.51333	1.5	21.7736	-5
142	00:47:00	7.5	226.5	21	188.167	204.833	23	180.667	-21.6667	2	20.9573	-2.51333	1	21.1312	-4
143	00:47:20	7.5	226.5	21	185.5	202.833	22	178	-23.6667	1	20.648	-2.74533	0.5	20.8357	-3
144	00:47:40	7.5	226.5	21	188.167	202.833	22	180.667	-23.6667	1	20.9573	-2.74533	0.5	21.1423	-2
145	00:48:00	7.5	226.5	21	186.167	203.5	22	178.667	-23	1	20.7253	-2.668	0.5	20.9023	-1
146	00:48:20	7.5	226.5	21	190.167	204.167	22	182.667	-22.3333	1	21.1893	-2.59067	0.5	21.353	0
147	00:48:40	7.5	226.5	21	192.167	204.833	22	184.667	-21.6667	1	21.4213	-2.51333	0.5	21.5741	1
148	00:49:00	7.5	226.5	21	193.5	205.5	22	186	-21	1	21.576	-2.436	0.5	21.7188	2
149	00:49:20	7.5	226.5	21	196.167	202.833	22	188.667	-23.6667	1	21.8853	-2.74533	0.5	22.0625	3
150	00:49:40	7.5	226.5	21	196.833	204.833	23	189.333	-21.6667	2	21.9627	-2.51333	1	22.1286	4
151	00:50:00	7.5	226.5	21	198.167	205.5	22	190.667	-21	1	22.1173	-2.436	0.5	22.2567	5
152	00:50:20	7.5	226.5	21	197.5	205.5	22	190	-21	1	22.04	-2.436	0.5	22.1798	6
153	00:50:40	7.5	226.5	21	196.833	204.833	23	189.333	-21.6667	2	21.9627	-2.51333	1	22.1286	7
154	00:51:00	7.5	226.5	21	197.5	206.833	23	190	-19.6667	2	22.04	-2.28133	1	22.1803	8
155	00:51:20				198.167	207.5	22	198.167	207.5	22	22.9873	24.07	11	35.054
156	00:51:40				198.167	210.167	24	198.167	210.167	24	22.9873	24.3793	12	35.5917
157	00:52:00				196.833	207.5	23	196.833	207.5	23	22.8327	24.07	11.5	35.1133
158	00:52:20				196.167	206.167	22	196.167	206.167	22	22.7553	23.9153	11	34.7958
159	00:52:40				198.167	205.5	22	198.167	205.5	22	22.9873	23.838	11	34.8951
160	00:53:00				196.167	210.167	24	196.167	210.167	24	22.7553	24.3793	12	35.4423
161	00:53:20				195.5	208.167	23	195.5	208.167	23	22.678	24.1473	11.5	35.0662
162	00:53:40				194.167	210.833	24	194.167	210.833	24	22.5233	24.4567	12	35.3473
163	00:54:00				194.167	210.833	23	194.167	210.833	23	22.5233	24.4567	11.5	35.1807
164	00:54:20				196.833	216.167	23	196.833	216.167	23	22.8327	25.0753	11.5	35.81
165	00:54:40				196.167	212.167	24	196.167	212.167	24	22.7553	24.6113	12	35.6023
166	00:55:00				194.833	214.167	24	194.833	214.167	24	22.6007	24.8433	12	35.6648
167	00:55:20				196.167	210.167	23	196.167	210.167	23	22.7553	24.3793	11.5	35.2762
168	00:55:40				196.833	210.833	23	196.833	210.833	23	22.8327	24.4567	11.5	35.3795
169	00:56:00				196.833	210.833	24	196.833	210.833	24	22.8327	24.4567	12	35.5452
170	00:56:20				196.167	210.833	23	196.167	210.833	23	22.7553	24.4567	11.5	35.3296
171	00:56:40				196.167	210.833	23	196.167	210.833	23	22.7553	24.4567	11.5	35.3296
172	00:57:00				194.833	213.5	23	194.833	213.5	23	22.6007	24.766	11.5	35.4457
173	00:57:20				192.833	214.167	23	192.833	214.167	23	22.3687	24.8433	11.5	35.3525
174	00:57:40	166.5	248	36	193.5	209.5	23	27	-38.5	-13	3.132	-4.466	-6.5	8.48555	-8
175	00:58:00	166.5	248	36	198.167	209.5	22	31.6667	-38.5	-14	3.67333	-4.466	-7	9.07957	-7
176	00:58:20	166.5	248	36	194.833	208.167	23	28.3333	-39.8333	-13	3.28667	-4.62067	-6.5	8.6257	-6
177	00:58:40	166.5	248	36	194.833	208.167	23	28.3333	-39.8333	-13	3.28667	-4.62067	-6.5	8.6257	-5
178	00:59:00	166.5	248	36	196.833	204.167	23	30.3333	-43.8333	-13	3.51867	-5.08467	-6.5	8.97133	-4
179	00:59:20	166.5	248	36	198.833	208.167	24	32.3333	-39.8333	-12	3.75067	-4.62067	-6	8.45092	-3
180	00:59:40	166.5	248	36	200.833	206.833	23	34.3333	-41.1667	-13	3.98267	-4.77533	-6.5	8.9953	-2
181	01:00:00	166.5	248	36	201.5	205.5	23	35	-42.5	-13	4.06	-4.93	-6.5	9.11255	-1
182	01:00:20	166.5	248	36	202.833	205.5	23	36.3333	-42.5	-13	4.21467	-4.93	-6.5	9.1825	0
183	01:00:40	166.5	248	36	204.167	208.833	23	37.6667	-39.1667	-13	4.36933	-4.54333	-6.5	9.05444	1
184	01:01:00	166.5	248	36	207.5	207.5	23	41	-40.5	-13	4.756	-4.698	-6.5	9.3242	2
185	01:01:20	166.5	248	36	208.167	204.833	24	41.6667	-43.1667	-12	4.83333	-5.00733	-6	9.18882	3
186	01:01:40	166.5	248	36	208.167	205.5	23	41.6667	-42.5	-13	4.83333	-4.93	-6.5	9.48241	4
187	01:02:00	166.5	248	36	208.167	205.5	24	41.6667	-42.5	-12	4.83333	-4.93	-6	9.14691	5
188	01:02:20	166.5	248	36	208.167	204.167	23	41.6667	-43.8333	-13	4.83333	-5.08467	-6.5	9.56373	6
189	01:02:40	166.5	248	36	210.167	204.833	24	43.6667	-43.1667	-12	5.06533	-5.00733	-6	9.31295	7
190	01:03:00	166.5	248	36	210.167	204.833	23	43.6667	-43.1667	-13	5.06533	-5.00733	-6.5	9.64267	8
191	01:03:20				212.167	202.833	22	212.167	202.833	22	24.6113	23.5287	11	35.7815
192	01:03:40				212.167	203.5	23	212.167	203.5	23	24.6113	23.606	11.5	35.989
193	01:04:00				214.167	203.5	23	214.167	203.5	23	24.8433	23.606	11.5	36.1481
194	01:04:20				214.167	201.5	22	214.167	201.5	22	24.8433	23.374	11	35.8404
195	01:04:40				214.167	201.5	23	214.167	201.5	23	24.8433	23.374	11.5	35.997
196	01:05:00				214.833	197.5	22	214.833	197.5	22	24.9207	22.91	11	35.5936
197	01:05:20				210.833	198.833	22	210.833	198.833	22	24.4567	23.0647	11	35.371
198	01:05:40				206.833	198.167	22	206.833	198.167	22	23.9927	22.9873	11	35.0009
199	01:06:00				212.833	198.167	20	212.833	198.167	20	24.6887	22.9873	10	35.1845
200	01:06:20				211.5	196.167	21	211.5	196.167	21	24.534	22.7553	10.5	35.071
201	01:06:40				208.833	197.5	22	208.833	197.5	22	24.2247	22.91	11	35.1099
202	01:07:00				206.833	199.5	21	206.833	199.5	21	23.9927	23.142	10.5	34.9493
203	01:07:20				208.833	198.167	20	208.833	198.167	20	24.2247	22.9873	10	34.8605
204	01:07:40				208.833	198.167	20	208.833	198.167	20	24.2247	22.9873	10	34.8605
205	01:08:00				208.833	195.5	20	208.833	195.5	20	24.2247	22.678	10	34.6573
206	01:08:20				208.833	194.833	19	208.833	194.833	19	24.2247	22.6007	9.5	34.4656
207	01:08:40	167	312.5	21	208.167	194.833	20	41.1667	-117.667	-1	4.77533	-13.6493	-0.5	14.4692	-8
208	01:09:00	167	312.5	21	210.833	193.5	20	43.8333	-119	-1	5.08467	-13.804	-0.5	14.7192	-7
209	01:09:20	167	312.5	21	211.5	190.167	20	44.5	-122.333	-1	5.162	-14.1907	-0.5	15.1086	-6
210	01:09:40	167	312.5	21	212.833	188.167	19	45.8333	-124.333	-2	5.31667	-14.4227	-1	15.4039	-5
211	01:10:00	167	312.5	21	214.167	186.167	19	47.1667	-126.333	-2	5.47133	-14.6547	-1	15.6747	-4
212	01:10:20	167	312.5	21	217.5	184.167	19	50.5	-128.333	-2	5.858	-14.8867	-1	16.029	-3
213	01:10:40	167	312.5	21	215.5	184.167	18	48.5	-128.333	-3	5.626	-14.8867	-1.5	15.9848	-2
214	01:11:00	167	312.5	21	218.833	183.5	18	51.8333	-129	-3	6.01267	-14.964	-1.5	16.1964	-1
215	01:11:20	167	312.5	21	218.167	182.167	17	51.1667	-130.333	-4	5.93533	-15.1187	-2	16.3647	0
216	01:11:40	167	312.5	21	220.833	181.5	17	53.8333	-131	-4	6.24467	-15.196	-2	16.5504	1
217	01:12:00	167	312.5	21	220.833	181.5	16	53.8333	-131	-5	6.24467	-15.196	-2.5	16.6182	2
218	01:12:20	167	312.5	21	220.833	180.833	17	53.8333	-131.667	-4	6.24467	-15.2733	-2	16.6214	3
219	01:12:40	167	312.5	21	221.5	178.833	17	54.5	-133.667	-4	6.322	-15.5053	-2	16.8637	4
220	01:13:00	167	312.5	21	221.5	178.833	17	54.5	-133.667	-4	6.322	-15.5053	-2	16.8637	5
221	01:13:20	167	312.5	21	222.833	178.167	16	55.8333	-134.333	-5	6.47667	-15.5827	-2.5	17.0592	6
222	01:13:40	167	312.5	21	223.5	178.167	17	56.5	-134.333	-4	6.554	-15.5827	-2	17.0228	7
223	01:14:00	167	312.5	21	223.5	178.167	18	56.5	-134.333	-3	6.554	-15.5827	-1.5	16.9713	8
224	01:14:20				226.167	176.167	15	226.167	176.167	15	26.2353	20.4353	7.5	34.0903
225	01:14:40				224.167	178.167	16	224.167	178.167	16	26.0033	20.6673	8	34.1659
226	01:15:00				224.167	180.167	15	224.167	180.167	15	26.0033	20.8993	7.5	34.1936
227	01:15:20				224.167	180.167	16	224.167	180.167	16	26.0033	20.8993	8	34.3068
228	01:15:40				224.167	177.5	14	224.167	177.5	14	26.0033	20.59	7	33.8987
229	01:16:00				224.167	178.167	15	224.167	178.167	15	26.0033	20.6673	7.5	34.0523
230	01:16:20				225.5	176.167	13	225.5	176.167	13	26.158	20.4353	6.5	33.8245
231	01:16:40				226.833	177.5	13	226.833	177.5	13	26.3127	20.59	6.5	34.0375
232	01:17:00				228.167	177.5	14	228.167	177.5	14	26.4673	20.59	7	34.2559
233	01:17:20				228.167	177.5	13	228.167	177.5	13	26.4673	20.59	6.5	34.1573
234	01:17:40				227.5	178.167	14	227.5	178.167	14	26.39	20.6673	7	34.2428
235	01:18:00				227.5	176.167	14	227.5	176.167	14	26.39	20.4353	7	34.1033
236	01:18:20				228.833	176.167	15	228.833	176.167	15	26.5447	20.4353	7.5	34.3289
237	01:18:40				230.833	174.833	13	230.833	174.833	13	26.7767	20.2807	6.5	34.2132
238	01:19:00				228.833	176.167	14	228.833	176.167	14	26.5447	20.4353	7	34.2231
239	01:19:20				228.833	176.167	13	228.833	176.167	13	26.5447	20.4353	6.5	34.1244
240	01:19:40				228.833	176.167	13	228.833	176.167	13	26.5447	20.4353	6.5	34.1244
241	01:20:00				226.833	176.833	12	226.833	176.833	12	26.3127	20.5127	6	33.8988
242	01:20:20				231.5	177.5	13	231.5	177.5	13	26.854	20.59	6.5	34.4577
243	01:20:40				231.5	174.167	13	231.5	174.167	13	26.854	20.2033	6.5	34.2281
244	01:21:00				233.5	175.5	14	233.5	175.5	14	27.086	20.358	7	34.5991
245	01:21:20				234.833	172.833	13	234.833	172.833	13	27.2407	20.0487	6.5	34.442
246	01:21:40				232.167	173.5	13	232.167	173.5	13	26.9313	20.126	6.5	34.2433
247	01:22:00				232.167	173.5	14	232.167	173.5	14	26.9313	20.126	7	34.3417
248	01:22:20				234.833	174.167	14	234.833	174.167	14	27.2407	20.2033	7	34.6299
249	01:22:40				234.833	174.167	14	234.833	174.167	14	27.2407	20.2033	7	34.6299
250	01:23:00				234.833	174.167	13	234.833	174.167	13	27.2407	20.2033	6.5	34.5323
251	01:23:20				232.167	174.833	14	232.167	174.833	14	26.9313	20.2807	7	34.4326
252	01:23:40				232.833	174.167	15	232.833	174.167	15	27.0087	20.2033	7.5	34.5528
253	01:24:00				234.167	175.5	15	234.167	175.5	15	27.1633	20.358	7.5	34.7641
254	01:24:20				233.5	173.5	13	233.5	173.5	13	27.086	20.126	6.5	34.3651
255	01:24:40	185.5	144	9	232.167	172.833	14	46.6667	28.8333	5	5.41333	3.34467	2.5	6.83674	-8
256	01:25:00	185.5	144	9	230.833	172.833	12	45.3333	28.8333	3	5.25867	3.34467	1.5	6.41018	-7
257	01:25:20	185.5	144	9	228.167	174.167	13	42.6667	30.1667	4	4.94933	3.49933	2	6.38289	-6
258	01:25:40	185.5	144	9	227.5	173.5	15	42	29.5	6	4.872	3.422	3	6.66682	-5
259	01:26:00	185.5	144	9	228.167	173.5	15	42.6667	29.5	6	4.94933	3.422	3	6.72354	-4
260	01:26:20	185.5	144	9	228.167	179.5	15	42.6667	35.5	6	4.94933	4.118	3	7.10309	-3
261	01:26:40	185.5	144	9	226.833	182.833	15	41.3333	38.8333	6	4.79467	4.50467	3	7.23055	-2
262	01:27:00	185.5	144	9	222.167	184.833	15	36.6667	40.8333	6	4.25333	4.73667	3	7.03753	-1
263	01:27:20	185.5	144	9	219.5	186.167	15	34	42.1667	6	3.944	4.89133	3	6.96278	0
264	01:27:40	185.5	144	9	218.167	188.167	15	32.6667	44.1667	6	3.78933	5.12333	3	7.04327	1
265	01:28:00	185.5	144	9	216.167	189.5	15	30.6667	45.5	6	3.55733	5.278	3	7.03647	2
266	01:28:20	185.5	144	9	213.5	190.167	15	28	46.1667	6	3.248	5.35533	3	6.94472	3
267	01:28:40	185.5	144	9	215.5	193.5	16	30	49.5	7	3.48	5.742	3.5	7.57172	4
268	01:29:00	185.5	144	9	215.5	193.5	19	30	49.5	10	3.48	5.742	5	8.37144	5
269	01:29:20	185.5	144	9	213.5	197.5	17	28	53.5	8	3.248	6.206	4	8.06622	6
270	01:29:40	185.5	144	9	211.5	200.167	16	26	56.1667	7	3.016	6.51533	3.5	7.98723	7
271	01:30:00	185.5	144	9	208.167	202.167	17	22.6667	58.1667	8	2.62933	6.74733	4	8.27284	8
272	01:30:20				212.833	206.833	16	212.833	206.833	16	24.6887	23.9927	8	35.3437
273	01:30:40				210.167	209.5	16	210.167	209.5	16	24.3793	24.302	8	35.3403
274	01:31:00				211.5	209.5	15	211.5	209.5	15	24.534	24.302	7.5	35.3377
275	01:31:20				206.833	208.167	17	206.833	208.167	17	23.9927	24.1473	8.5	35.0855
276	01:31:40				212.167	209.5	17	212.167	209.5	17	24.6113	24.302	8.5	35.6168
277	01:32:00				212.833	212.833	18	212.833	212.833	18	24.6887	24.6887	9	36.0564
278	01:32:20				212.833	212.833	19	212.833	212.833	19	24.6887	24.6887	9.5	36.1844
279	01:32:40				212.833	212.833	19	212.833	212.833	19	24.6887	24.6887	9.5	36.1844
280	01:33:00				213.5	214.167	18	213.5	214.167	18	24.766	24.8433	9	36.2153
281	01:33:20				213.5	214.167	18	213.5	214.167	18	24.766	24.8433	9	36.2153
282	01:33:40				213.5	214.167	17	213.5	214.167	17	24.766	24.8433	8.5	36.0943
283	01:34:00				213.5	214.167	18	213.5	214.167	18	24.766	24.8433	9	36.2153
284	01:34:20				212.167	216.833	19	212.167	216.833	19	24.6113	25.1527	9.5	36.4503
285	01:34:40				213.5	217.5	19	213.5	217.5	19	24.766	25.23	9.5	36.6082
286	01:35:00				213.5	217.5	19	213.5	217.5	19	24.766	25.23	9.5	36.6082
287	01:35:20				212.833	217.5	19	212.833	217.5	19	24.6887	25.23	9.5	36.5559
288	01:35:40				214.167	217.5	19	214.167	217.5	19	24.8433	25.23	9.5	36.6605
289	01:36:00				212.167	220.167	19	212.167	220.167	19	24.6113	25.5393	9.5	36.7182
290	01:36:20				209.5	219.5	19	209.5	219.5	19	24.302	25.462	9.5	36.4575
291	01:36:40				214.167	221.5	19	214.167	221.5	19	24.8433	25.694	9.5	36.9814
292	01:37:00				210.833	222.833	19	210.833	222.833	19	24.4567	25.8487	9.5	36.8311
293	01:37:20				212.833	220.167	19	212.833	220.167	19	24.6887	25.5393	9.5	36.7701
294	01:37:40				208.833	216.833	18	208.833	216.833	18	24.2247	25.1527	9	36.0623
295	01:38:00				206.833	214.167	18	206.833	214.167	18	23.9927	24.8433	9	35.6909
296	01:38:20				204.167	216.167	19	204.167	216.167	19	23.6833	25.0753	9.5	35.776
297	01:38:40				208.167	217.5	20	208.167	217.5	20	24.1473	25.23	10	36.3269
298	01:39:00				209.5	215.5	21	209.5	215.5	21	24.302	24.998	10.5	36.4107
299	01:39:20				209.5	210.833	20	209.5	210.833	20	24.302	24.4567	10	35.8987
300	01:39:40				211.5	212.167	19	211.5	212.167	19	24.534	24.6113	9.5	36.0262
301	01:40:00				213.5	212.833	19	213.5	212.833	19	24.766	24.6887	9.5	36.2372
302	01:40:20				212.833	212.833	20	212.833	212.833	20	24.6887	24.6887	10	36.3189
303	01:40:40				211.5	213.5	20	211.5	213.5	20	24.534	24.766	10	36.2667
304	01:41:00				213.5	215.5	20	213.5	215.5	20	24.766	24.998	10	36.5822
305	01:41:20				216.167	215.5	20	216.167	215.5	20	25.0753	24.998	10	36.7923
306	01:41:40				214.167	212.833	19	214.167	212.833	19	24.8433	24.6887	9.5	36.2901
307	01:42:00				211.5	215.5	18	211.5	215.5	18	24.534	24.998	9	36.1638
308	01:42:20				212.167	212.833	18	212.167	212.833	18	24.6113	24.6887	9	36.0034
309	01:42:40				210.167	212.167	18	210.167	212.167	18	24.3793	24.6113	9	35.792
310	01:43:00				212.167	214.167	19	212.167	214.167	19	24.6113	24.8433	9.5	36.2375
311	01:43:20				209.601	210.106	18	209.601	210.106	18	24.3137	24.3723	9	35.5832
312	01:43:40				210.106	210.106	19	210.106	210.106	19	24.3723	24.3723	9.5	35.7529
313	01:44:00				212.126	214.146	21	212.126	214.146	21	24.6066	24.841	10.5	36.5077
314	01:44:20				213.641	215.157	20	213.641	215.157	20	24.7824	24.9582	10	36.5661
315	01:44:40				214.652	212.631	20	214.652	212.631	20	24.8996	24.6652	10	36.4467
316	01:45:00				213.641	214.146	20	213.641	214.146	20	24.7824	24.841	10	36.4862
317	01:45:20				214.146	215.157	21	214.146	215.157	21	24.841	24.9582	10.5	36.7455
318	01:45:40				216.672	215.157	21	216.672	215.157	21	25.1339	24.9582	10.5	36.9442
319	01:46:00	214	225	37	216.672	219.197	19	2.67172	-5.80303	-18	0.309919	-0.673152	-9	9.03046	-7
320	01:46:20	214	225	37	215.662	219.197	19	1.66162	-5.80303	-18	0.192747	-0.673152	-9	9.0272	-6
321	01:46:40	214	225	37	215.662	216.167	19	1.66162	-8.83333	-18	0.192747	-1.02467	-9	9.06019	-5
322	01:47:00	214	225	37	212.631	217.682	20	-1.36869	-7.31818	-17	-0.158768	-0.848909	-8.5	8.54376	-4
323	01:47:20	214	225	37	212.631	217.682	21	-1.36869	-7.31818	-16	-0.158768	-0.848909	-8	8.04648	-3
324	01:47:40	214	225	37	212.631	215.662	21	-1.36869	-9.33838	-16	-0.158768	-1.08325	-8	8.07457	-2
325	01:48:00	214	225	37	209.096	212.631	21	-4.90404	-12.3687	-16	-0.568869	-1.43477	-8	8.14753	-1
326	01:48:20	214	225	37	206.571	211.116	22	-7.42929	-13.8838	-15	-0.861798	-1.61053	-7.5	7.71923	0
327	01:48:40	214	225	37	206.571	214.652	23	-7.42929	-10.3485	-14	-0.861798	-1.20042	-7	7.15428	1
328	01:49:00	214	225	37	210.611	214.652	21	-3.38889	-10.3485	-16	-0.393111	-1.20042	-8	8.09911	2
329	01:49:20	214	225	37	211.621	218.187	22	-2.37879	-6.81313	-15	-0.275939	-0.790323	-7.5	7.54657	3
330	01:49:40	112	185.5	26	213.136	215.157	21	101.136	29.6566	-5	11.7318	3.44016	-2.5	12.4788	-3
331	01:50:00	112	185.5	26	212.631	212.631	21	100.631	27.1313	-5	11.6732	3.14723	-2.5	12.3458	-2
332	01:50:20	112	185.5	26	214.652	210.611	20	102.652	25.1111	-6	11.9076	2.91289	-3	12.6204	-1
333	01:50:40	112	185.5	26	211.116	211.116	21	99.1162	25.6162	-5	11.4975	2.97147	-2.5	12.1356	0
334	01:51:00	112	185.5	26	209.601	211.116	21	97.601	25.6162	-5	11.3217	2.97147	-2.5	11.9692	1
335	01:51:20	112	185.5	26	208.591	208.591	21	96.5909	23.0909	-5	11.2045	2.67855	-2.5	11.7884	2
336	01:51:40	112	185.5	26	211.116	206.066	21	99.1162	20.5657	-5	11.4975	2.38562	-2.5	12.0055	3
337	01:52:00	112	185.5	26	214.146	207.076	21	102.146	21.5758	-5	11.849	2.50279	-2.5	12.3658	4
338	01:52:20	112	185.5	26	214.146	207.076	20	102.146	21.5758	-6	11.849	2.50279	-3	12.4765	5
339	01:52:40	112	185.5	26	215.157	205.056	20	103.157	19.5556	-6	11.9662	2.26844	-3	12.5433	6
340	01:53:00	112	185.5	26	215.157	202.53	20	103.157	17.0303	-6	11.9662	1.97552	-3	12.4937	7
341	01:53:20				216.167	201.015	20	216.167	201.015	20	25.0753	23.3178	10	35.672
342	01:53:40	111	176	24	215.662	202.53	20	104.662	26.5303	-4	12.1407	3.07752	-2	12.6834	-8
343	01:54:00	111	176	24	216.672	205.561	19	105.672	29.5606	-5	12.2579	3.42903	-2.5	12.9717	-7
344	01:54:20	111	176	24	215.157	204.045	19	104.157	28.0455	-5	12.0822	3.25327	-2.5	12.7598	-6
345	01:54:40	111	176	24	214.146	201.015	19	103.146	25.0152	-5	11.965	2.90176	-2.5	12.5631	-5
346	01:55:00	111	176	24	216.167	201.015	18	105.167	25.0152	-6	12.1993	2.90176	-3	12.8936	-4
347	01:55:20	111	176	24	217.177	201.015	19	106.177	25.0152	-5	12.3165	2.90176	-2.5	12.8983	-3
348	01:55:40	111	176	24	218.692	201.015	20	107.692	25.0152	-4	12.4923	2.90176	-2	12.9799	-2
349	01:56:00	111	176	24	217.177	196.47	21	106.177	20.4697	-3	12.3165	2.37448	-1.5	12.6327	-1
350	01:56:20	111	176	24	218.187	198.49	19	107.187	22.4899	-5	12.4337	2.60883	-2.5	12.9481	0
351	01:56:40	111	176	24	218.187	196.47	18	107.187	20.4697	-6	12.4337	2.37448	-3	13.009	1
352	01:57:00	111	176	24	217.177	196.975	17	106.177	20.9747	-7	12.3165	2.43307	-3.5	13.0333	2
353	01:57:20	111	176	24	216.167	198.995	19	105.167	22.9949	-5	12.1993	2.66741	-2.5	12.7353	3
354	01:57:40	111	176	24	213.641	194.449	18	102.641	18.4495	-6	11.9064	2.14014	-3	12.4637	4
355	01:58:00	111	176	24	215.662	196.47	19	104.662	20.4697	-5	12.1407	2.37448	-2.5	12.6209	5
356	01:58:20	111	176	24	214.652	196.47	20	103.652	20.4697	-4	12.0236	2.37448	-2	12.4179	6
357	01:58:40	111	176	24	211.621	195.965	20	100.621	19.9646	-4	11.6721	2.3159	-2	12.0665	7
358	01:59:00	111	176	24	213.136	196.975	20	102.136	20.9747	-4	11.8478	2.43307	-2	12.2593	8
359	01:59:20				217.682	192.934	20	217.682	192.934	20	25.2511	22.3804	10	35.1923
360	01:59:40				218.692	194.449	20	218.692	194.449	20	25.3683	22.5561	10	35.3883
361	02:00:00				222.732	196.47	20	222.732	196.47	20	25.8369	22.7905	10	35.8741
362	02:00:20				220.207	194.955	19	220.207	194.955	19	25.544	22.6147	9.5	35.4143
363	02:00:40				219.197	196.975	20	219.197	196.975	20	25.4268	22.8491	10	35.6175
364	02:01:00				222.227	196.975	20	222.227	196.975	20	25.7784	22.8491	10	35.8693
365	02:01:20				225.258	194.449	20	225.258	194.449	20	26.1299	22.5561	10	35.9381
366	02:01:40				221.722	194.955	19	221.722	194.955	19	25.7198	22.6147	9.5	35.5413
367	02:02:00				222.732	194.449	19	222.732	194.449	19	25.8369	22.5561	9.5	35.589
368	02:02:20				222.227	193.944	18	222.227	193.944	18	25.7784	22.4976	9	35.3789
369	02:02:40				219.702	193.439	19	219.702	193.439	19	25.4854	22.439	9.5	35.26
370	02:03:00				219.702	193.944	19	219.702	193.944	19	25.4854	22.4976	9.5	35.2973
371	02:03:20				221.722	195.965	18	221.722	195.965	18	25.7198	22.7319	9	35.4859
372	02:03:40				221.217	192.934	18	221.217	192.934	18	25.6612	22.3804	9	35.219
373	02:04:00				219.702	189.904	19	219.702	189.904	19	25.4854	22.0289	9.5	35.0004
374	02:04:20				214.146	192.429	18	214.146	192.429	18	24.841	22.3218	9	34.5881
375	02:04:40				219.197	189.399	19	219.197	189.399	19	25.4268	21.9703	9.5	34.9209
376	02:05:00				216.167	189.904	18	216.167	189.904	18	25.0753	22.0289	9	34.5694
377	02:05:20				216.167	187.884	19	216.167	187.884	19	25.0753	21.7945	9.5	34.5546
378	02:05:40				216.167	187.884	19	216.167	187.884	19	25.0753	21.7945	9.5	34.5546
379	02:06:00				219.197	185.864	18	219.197	185.864	18	25.4268	21.5602	9	34.5307
380	02:06:20				215.157	187.884	17	215.157	187.884	17	24.9582	21.7945	8.5	34.2076
381	02:06:40				210.611	186.874	17	210.611	186.874	17	24.4309	21.6774	8.5	33.7495
382	02:07:00				213.641	187.379	17	213.641	187.379	17	24.7824	21.7359	8.5	34.0422
383	02:07:20				212.126	187.884	18	212.126	187.884	18	24.6066	21.7945	9	34.0806
384	02:07:40				212.631	185.864	17	212.631	185.864	17	24.6652	21.5602	8.5	33.8447
385	02:08:00				213.136	184.348	17	213.136	184.348	17	24.7238	21.3844	8.5	33.7759
386	02:08:20				213.641	185.864	18	213.641	185.864	18	24.7824	21.5602	9	34.0589
387	02:08:40				212.126	184.854	18	212.126	184.854	18	24.6066	21.443	9	33.8569
388	02:09:00				213.136	183.338	16	213.136	183.338	16	24.7238	21.2673	8	33.5792
389	02:09:20				214.146	183.338	16	214.146	183.338	16	24.841	21.2673	8	33.6656
390	02:09:40				213.136	182.833	17	213.136	182.833	17	24.7238	21.2087	8.5	33.6649
391	02:10:00				210.106	180.813	17	210.106	180.813	17	24.3723	20.9743	8.5	33.2593
392	02:10:20				210.106	182.833	16	210.106	182.833	16	24.3723	21.2087	8	33.2839
393	02:10:40				209.096	180.308	16	209.096	180.308	16	24.2551	20.9157	8	33.0118
394	02:11:00				207.581	181.823	17	207.581	181.823	17	24.0794	21.0915	8.5	33.1197
395	02:11:20				206.571	180.813	15	206.571	180.813	15	23.9622	20.9743	7.5	32.7163
396	02:11:40				208.591	180.813	15	208.591	180.813	15	24.1965	20.9743	7.5	32.8884
397	02:12:00				209.096	179.298	14	209.096	179.298	14	24.2551	20.7986	7	32.7092
398	02:12:20				204.551	179.298	14	204.551	179.298	14	23.7279	20.7986	7	32.3201
399	02:12:40				202.53	180.813	14	202.53	180.813	14	23.4935	20.9743	7	32.2625
400	02:13:00				201.52	180.308	15	201.52	180.308	15	23.3763	20.9157	7.5	32.2517
401	02:13:20				200.51	181.318	15	200.51	181.318	15	23.2592	21.0329	7.5	32.2432
402	02:13:40				200.51	182.328	14	200.51	182.328	14	23.2592	21.1501	7	32.2074
403	02:14:00				197.985	182.833	15	197.985	182.833	15	22.9662	21.2087	7.5	32.1482
404	02:14:20				202.025	180.813	14	202.025	180.813	14	23.4349	20.9743	7	32.2198
405
