# Supplementary material for: A role for the centrosome in regulating the rate of neuronal efferocytosis by microglia in vivo
Source: eLife. 2022 Nov 18;11:e82094. doi: 10.7554/eLife.82094 (PMC9674339; doi:10.7554/eLife.82094)
Supplement: Figure 6—figure supplement 1—source data 1. [file elife-82094-fig6-figsupp1-data1.xlsx]

## Sheet: Lamp1-analysis
Fish	# microglia	Lamp1 expression	# of phagosomes	Phagosome	Size (um)	Av size (um)		Statistics from Graphpad Prism 9
1	1	No	5	1	4.419	2.8286		Table Analyzed	size of phagosomes Lamp1		Table Analyzed	#phagosomes Lamp1
				2	2.363
				3	4.402			Column B	Lamp1		Column B	Lamp1
				4	0.468			vs.	vs,		vs.	vs,
				5	2.491			Column A	Wt		Column A	Wt
	2	Yes	10	1	3.556	2.8351
				2	3.801			Unpaired t test			Unpaired t test
				3	2.167			P value	0.113		P value	0.2544
				4	1.723			P value summary	ns		P value summary	ns
				5	1.429			Significantly different (P < 0.05)?	No		Significantly different (P < 0.05)?	No
				6	4.283			One- or two-tailed P value?	Two-tailed		One- or two-tailed P value?	Two-tailed
				7	2.868			t, df	t=1,587, df=524		t, df	t=1,149, df=74
				8	4.056
				9	2.711			How big is the difference?			How big is the difference?
				10	1.757			Mean of column A	2.555		Mean of column A	6.534
	3	No	3	1	1.984	3.77667		Mean of column B	2.336		Mean of column B	8
				2	4.816			Difference between means (B - A) ± SEM	-0,2199 ± 0,1385		Difference between means (B - A) ± SEM	1,466 ± 1,276
				3	4.53			95% confidence interval	-0,4920 to 0,05222		95% confidence interval	-1,076 to 4,008
	4	Yes	10	1	2.721	3.4443		R squared (eta squared)	0.004786		R squared (eta squared)	0.01752
				2	3.102
				3	3.453			F test to compare variances			F test to compare variances
				4	2.381			F, DFn, Dfd	1,387, 380, 144		F, DFn, Dfd	1,134, 17, 57
				5	2.51			P value	0.0227		P value	0.6947
				6	2.741			P value summary	*		P value summary	ns
				7	6.969			Significantly different (P < 0.05)?	Yes		Significantly different (P < 0.05)?	No
				8	2.762
				9	4.174			Data analyzed			Data analyzed
				10	3.63			Sample size, column A	381		Sample size, column A	58
	5	No	4	1	3.093	2.808		Sample size, column B	145		Sample size, column B	18
				2	3.976
				3	2.831
				4	1.332
2	1	No	8	1	4.403	3.95325
				2	3.869
				3	3.754
				4	3.554
				5	3.299
				6	4.163
				7	4.877
				8	3.707
	2	No	8	1	1.018	2.61729
				2	3.441
				3	3.584
				4	1.576
				5	5.932
				6	1.697
				7	1.073
				8	5.819
	3	No	11	1	3.884	3.32309
				2	4.844
				3	2.396
				4	3.172
				5	3.154
				6	3.152
				7	2.933
				8	3.028
				9	2.674
				10	3.112
				11	4.205
	4	Yes	7	1	3.754	2.64643
				2	1.665
				3	2.068
				4	3.884
				5	3.533
				6	1.803
				7	1.818
	5	No	1	1	1.477	1.477
	6	No	15	1	3.808	1.99027
				2	1.388
				3	1.34
				4	1.739
				5	1.494
				6	4.148
				7	2.147
				8	0.876
				9	2.848
				10	2.087
				11	1.739
				12	1.72
				13	1.703
				14	0.633
				15	2.184
	7	Yes	2	1	4.147	4.23
				2	4.313
3	1	No	4	1	1.322	1.665
				2	1.708
				3	1.668
				4	1.962
	2	No	6	1	4.944	2.8435
				2	1.399
				3	5.211
				4	3.256
				5	1.234
				6	1.017
	3	No	3	1	3.702	3.20733
				2	4.131
				3	1.789
	4	No	6	1	2.131	2.82667
				2	3.662
				3	3.818
				4	5.434
				5	1.005
				6	0.91
	5	No	3	1	2.131	2.216
				2	2.324
				3	2.193
	6	Yes	13	1	4.887	2.42838
				2	0.776
				3	3.64
				4	1.833
				5	2.365
				6	2.888
				7	3.161
				8	2.504
				9	1.182
				10	2.136
				11	2.393
				12	1.547
				13	2.257
	7	Yes	1	1	2.671	2.671
4	1	Yes	16	1	2.232	1.77969
				2	1.853
				3	0.883
				4	0.809
				5	3.327
				6	3.103
				7	1.421
				8	2.608
				9	0.91
				10	1.546
				11	1.563
				12	0.687
				13	3.55
				14	1.309
				15	2.035
				16	0.639
	2	Yes	4	1	4.076	3.10325
				2	3.212
				3	3.05
				4	2.075
	3	No	7	1	1.078	2.87014
				2	1.365
				3	1.43
				4	1.93
				5	2.29
				6	4.251
				7	7.747
	4	No	8	1	3.617	2.85656
				2	2.451
				3	2.354
				4	4.126
				5	1.752
				6	1.906
				7	4.654
				8	2.495
				9	2.354
5	1	No	7	1	1.784	2.77457
				2	1.995
				3	2.936
				4	0.813
				5	5.6
				6	2.794
				7	3.5
	2	No	0
	3	No	5	1	3.533	2.6426
				2	1.873
				3	1.862
				4	2.053
				5	3.892
	4	No	3	1	5.825	3.36833
				2	1.084
				3	3.196
	5	No	4	1	2.837	3.04175
				2	3.588
				3	3.54
				4	2.202
	6	No	1	1	2.88	2.88
	7	No	4	1	4.366	2.713
				2	1.867
				3	3.659
				4	0.96
	8	No	6	1	3.857	3.063
				2	2.713
				3	2.867
				4	3.269
				5	2.651
				6	3.021
	9	Yes	13	1	2.674	2.52631
				2	2.151
				3	3.667
				4	2.144
				5	2.763
				6	6.507
				7	0.769
				8	3.972
				9	3.032
				10	1.654
				11	1.632
				12	1.005
				13	0.872
	10	No	0
6	1	Yes	5	1	3.196	2.239
				2	3.049
				3	2.399
				4	1.34
				5	1.211
	2	Yes	8	1	2.862	1.69962
				2	1.07
				3	0.857
				4	1.664
				5	1.526
				6	1.639
				7	1.242
				8	2.737
	3	Yes	15	1	2.674	1.73227
				2	1.337
				3	0.813
				4	0.946
				5	0.622
				6	2.452
				7	1.605
				8	2.709
				9	1.037
				10	0.869
				11	2.19
				12	1.277
				13	1.067
				14	1.319
				15	5.067
	4	No	3	1	4.463	3.90533
				2	2.963
				3	4.29
	5	No	3	1	1.559	1.38767
				2	1.607
				3	0.997
7	1	Yes	6	1	1.739	1.44229
				2	1.691
				3	1.157
				4	1.353
				5	1.189
				6	2.03
				7	0.937
	2	Yes	5	1	2.392	1.915
				2	1.417
				3	1.639
				4	0.822
				5	3.305
	3	No	3	1	2.205	2.21767
				2	2.202
				3	2.246
	4	No	2	1	1.611	1.304
				2	0.997
	5	Yes	15	1	1.44	2.2814
				2	2.541
				3	1.185
				4	1.037
				5	5.219
				6	2.939
				7	2.106
				8	0.856
				9	2.851
				10	4.039
				11	1.734
				12	1.384
				13	2.207
				14	2.695
				15	1.988
	6	No	6	1	5.689	2.99333
				2	2.963
				3	2.848
				4	2.721
				5	2.409
				6	1.33
	7	No	8	1	4.199	2.55638
				2	1.769
				3	1.518
				4	1.392
				5	5.397
				6	4.246
				7	0.846
				8	1.084
	8	Yes	0
	9	No	9	1	3.568	1.204
				2	0.529
				3	1.311
				4	0.334
				5	0.805
				6	1.116
				7	1.078
				8	1.072
				9	1.023
8	1	No	1	1	0.904	0.904
	2	Yes	5	1	3.159	2.1978
				2	1.258
				3	3.993
				4	0.911
				5	1.668
	3	No	4	1	2.462	1.92325
				2	1.822
				3	1.607
				4	1.802
	4	No	15	1	4.406	2.80507
				2	1.14
				3	0.989
				4	2.942
				5	3.148
				6	3.356
				7	1.408
				8	4.939
				9	3.294
				10	4.099
				11	0.764
				12	3.685
				13	4.137
				14	1.424
				15	2.345
	5	No	12	1	1.694	1.70575
				2	2.4
				3	1.045
				4	2.224
				5	2.083
				6	1.214
				7	2.323
				8	1.977
				9	2.692
				10	1.161
				11	0.847
				12	0.809
	6	No	12	1	4.928	2.7335
				2	1.152
				3	4.609
				4	2.321
				5	1.864
				6	1.841
				7	1.593
				8	0.455
				9	3.916
				10	3.801
				11	2.122
				12	4.2
	7	No	8	1	1.342	2.40338
				2	2.959
				3	3.841
				4	2.816
				5	2.35
				6	3.712
				7	1.103
				8	1.104
	8	No	13	1	4.735	2.81169
				2	3.06
				3	3.06
				4	1.61
				5	0.986
				6	5.228
				7	2.177
				8	4.921
				9	1.597
				10	1.652
				11	4.09
				12	1.751
				13	1.685
9	1	No	2	1	0.804	1.199
				2	1.594
	2	No	9	1	2.565	2.12933
				2	1.112
				3	1.279
				4	2.856
				5	4.307
				6	1.442
				7	1.221
				8	0.674
				9	3.708
	3	No	0
	4	No	4	1	7.721	3.00075
				2	2.203
				3	1.253
				4	0.826
	5	No	5	1	5.659	4.0688
				2	6.868
				3	1.042
				4	4.296
				5	2.479
	6	No	5	1	4.389	2.9265
				2	3.684
				3	3.329
				4	2.681
				5	1.172
				6	2.304
	7	No	4	1	4.199	3.86475
				2	4.289
				3	5.519
				4	1.452
	8	No	9	1	0.809	2.30244
				2	1.222
				3	0.91
				4	1.753
				5	1.126
				6	2.977
				7	3.349
				8	5.213
				9	3.363
	9	No	10	1	4.499	1.8815
				2	2.316
				3	1.422
				4	0.916
				5	1.218
				6	1.481
				7	3.208
				8	1.124
				9	1.589
				10	1.042
	10	Yes	9	1	3.912	2.80467
				2	4.327
				3	0.776
				4	0.547
				5	0.899
				6	4.943
				7	5.221
				8	1.144
				9	3.473
10	1	No	21	1	3.965	2.50781
				2	0.738
				3	1.98
				4	0.734
				5	0.482
				6	2.948
				7	3.049
				8	3.319
				9	3.454
				10	5.846
				11	1.012
				12	4.855
				13	1.108
				14	1.136
				15	5.041
				16	4.974
				17	1.443
				18	2.031
				19	1.719
				20	1.819
				21	1.011
	2	No	20	1	1.196	1.9592
				2	1.514
				3	4.091
				4	1.45
				5	0.956
				6	0.842
				7	0.715
				8	3.754
				9	3.51
				10	0.762
				11	0.932
				12	1.08
				13	0.957
				14	4.165
				15	5.494
				16	1.605
				17	0.984
				18	2.876
				19	1.185
				20	1.116
	3	No	12	1	5.092	2.86483
				2	3.784
				3	2.238
				4	1.384
				5	3.165
				6	3.367
				7	3.566
				8	2.494
				9	1.675
				10	4.314
				11	1.437
				12	1.862
	4	No	12	1	3.078	2.32317
				2	2.911
				3	0.759
				4	0.876
				5	1.178
				6	3.916
				7	5.262
				8	2.177
				9	4.342
				10	1.079
				11	1.178
				12	1.122
	5	No	7	1	0.598	2.77086
				2	1.08
				3	5.179
				4	1.124
				5	1.205
				6	7.054
				7	3.156
	6	No	10	1	2.205	2.3141
				2	3.596
				3	3.073
				4	2.84
				5	2.21
				6	0.805
				7	2.812
				8	2.791
				9	1.331
				10	1.478
	7	No	8	1	5.268	2.12025
				2	1.734
				3	2.474
				4	1.272
				5	0.975
				6	2.397
				7	1.819
				8	1.023
	8	No	6	1	4.32	2.593
				2	1.58
				3	0.67
				4	3.309
				5	4.253
				6	1.426
	9	No	4	1	8.027	3.02075
				2	1.472
				3	1.743
				4	0.841
	10	No	0
	11	No	10	1	1.269	2.1657
				2	2.713
				3	1.316
				4	1.304
				5	0.709
				6	0.879
				7	5.355
				8	4.093
				9	2.622
				10	1.397

## Sheet: Rab5-analysis
Fish	# microglia	Rab5a expression	# of phagosomes	Phagosome	Size (um)	Av size (um)		Statistics from Graphpad Prism 9
1	1	yes	12	1	3.001	2.91283		Table Analyzed	#phagosomes Rab5a		Table Analyzed	size of phagosomes Rab5a
				2	1.487
				3	1.396			Column B	Rab5a		Column B	Rab5a
				4	2.047			vs.	vs,		vs.	vs,
				5	6.245			Column A	Wt		Column A	Wt
				6	3.813
				7	1.834			Unpaired t test			Unpaired t test
				8	3.847			P value	0.0539		P value	0.4426
				9	3.284			P value summary	ns		P value summary	ns
				10	1.319			Significantly different (P < 0.05)?	No		Significantly different (P < 0.05)?	No
				11	4.066			One- or two-tailed P value?	Two-tailed		One- or two-tailed P value?	Two-tailed
				12	2.615			t, df	t=1,950, df=104		t, df	t=0,7682, df=731
	2	yes	7	1	3.332	3.833
				2	2.921			How big is the difference?			How big is the difference?
				3	6.546			Mean of column A	6		Mean of column A	2.805
				4	1.759			Mean of column B	7.293		Mean of column B	2.694
				5	5.141			Difference between means (B - A) ± SEM	1,293 ± 0,6633		Difference between means (B - A) ± SEM	-0,1113 ± 0,1449
				6	5.608			95% confidence interval	-0,02197 to 2,609		95% confidence interval	-0,3958 to 0,1732
				7	1.524			R squared (eta squared)	0.03527		R squared (eta squared)	0.0008065
	3	yes	18	1	2.529	2.05556
				2	4.304			F test to compare variances			F test to compare variances
				3	1.791			F, DFn, Dfd	1,165, 30, 74		F, DFn, Dfd	1,265, 546, 185
				4	1.761			P value	0.5851		P value	0.0581
				5	1.237			P value summary	ns		P value summary	ns
				6	1.415			Significantly different (P < 0.05)?	No		Significantly different (P < 0.05)?	No
				7	5.197
				8	4.862			Data analyzed			Data analyzed
				9	1.19			Sample size, column A	31		Sample size, column A	186
				10	1.064			Sample size, column B	75		Sample size, column B	547
				11	1.38
				12	0.948
				13	3.243
				14	1.629
				15	0.909
				16	1.17
				17	1.294
				18	1.077
	4	yes	2	1	3.047	2.6375
				2	2.228
	5	yes	2	1	4.038
				2	3.792
	6	yes	6	1	3.239	2.54833
				2	4.387
				3	1.317
				4	1.544
				5	1.353
				6	3.45
	7	yes	12	1	4.817	2.25242
				2	0.857
				3	1.193
				4	1.55
				5	4.015
				6	3.464
				7	5.363
				8	1.193
				9	1.6
				10	0.619
				11	1.064
				12	1.294
	8	yes	14	1	3.656	2.27164
				2	5.065
				3	4.342
				4	1.724
				5	1.672
				6	1.004
				7	0.877
				8	3.256
				9	2.504
				10	2.31
				11	1.004
				12	2.131
				13	1.851
				14	0.407
3	1	yes	4	1	4.904	2.848
				2	3.655
				3	1.615
				4	1.218
	2	yes	8	1	4.871	2.4405
				2	3.611
				3	1.332
				4	0.9
				5	1.9
				6	4.606
				7	1.283
				8	1.021
	3	no	1	1	5.351
	4	yes	6	1	5.894	2.92017
				2	6.403
				3	1.013
				4	1.013
				5	1.281
				6	1.917
	5	yes	5	1	2.284	3.1068
				2	1.558
				3	5.131
				4	4.078
				5	2.483
	6	yes	4	1	5.894	4.348
				2	5.43
				3	3.718
				4	2.35
	7	no	1	1	3.917
	8	no	4	1	5.514	3.642
				2	4.992
				3	1.591
				4	2.471
	9	no	9	1	5.478	3.28244
				2	4.976
				3	2.045
				4	2.644
				5	2.425
				6	4.817
				7	4.986
				8	0.936
				9	1.235
	10	yes	8	1	5.589	2.7565
				2	1.428
				3	1.072
				4	1.049
				5	5.248
				6	5.611
				7	0.962
				8	1.093
4	1	no	3	1	5.624	3.36533
				2	0.827
				3	3.645
	2	no	4	1	5.267	3.4195
				2	4.049
				3	2.827
				4	1.535
	3	yes	12	1	5.402	2.47575
				2	4.598
				3	3.971
				4	1.086
				5	1.13
				6	1.714
				7	2.046
				8	0.764
				9	1.848
				10	1.332
				11	1.904
				12	3.914
	4	yes	8	1	3.447	2.95463
				2	1.811
				3	2.237
				4	4.049
				5	4.312
				6	1.925
				7	2.475
				8	3.381
	5	yes	5	1	3.617	1.818
				2	0.915
				3	1.252
				4	2.249
				5	1.057
	6	yes	6	1	3.51	3.0725
				2	3.808
				3	1.92
				4	1.742
				5	4.038
				6	3.417
	7	yes	6	1	4.828	3.17517
				2	3.624
				3	0.681
				4	2.951
				5	4.901
				6	2.066
	8	no	5	1	7.347
				2	1.567
				3	5.474
				4	5
				5	1.481
	9	no	11	1	2.478	3.50009
				2	5.406
				3	3.841
				4	2.889
				5	4.919
				6	5.096
				7	3.111
				8	2.884
				9	4.38
				10	1.618
				11	1.879
	10	yes	10	1	1.921	3.3334
				2	6.805
				3	4.749
				4	3.518
				5	1.022
				6	2.124
				7	5.693
				8	1.674
				9	1.26
				10	4.568
	11	yes	6	1	5.09	2.97117
				2	4.506
				3	2.539
				4	1.338
				5	3.551
				6	0.803
5	1	yes	6	1	1.107	1.915
				2	3.253
				3	1.04
				4	0.767
				5	1.198
				6	4.125
	2	yes	11	1	4.007	2.51791
				2	5.244
				3	3.341
				4	0.819
				5	2.448
				6	2.353
				7	2.278
				8	3.192
				9	1.867
				10	1.577
				11	0.571
	3	yes	8	1	4.525	3.11425
				2	7.21
				3	0.78
				4	2.988
				5	3.633
				6	3.073
				7	1.551
				8	1.154
	4	yes	7	1	4.781	3.81629
				2	1.525
				3	2.089
				4	4.359
				5	4.862
				6	5.2
				7	3.898
	5	yes	11	1	0.759	2.64645
				2	5.161
				3	1.142
				4	1.614
				5	6.021
				6	2.312
				7	3.793
				8	1.534
				9	4.246
				10	1.199
				11	1.33
	6	yes	10	1	7.254	2.4308
				2	1.438
				3	3.593
				4	1.215
				5	2.601
				6	1.011
				7	4.492
				8	0.567
				9	1.135
				10	1.002
	7	yes	5	1	6.585	3.3044
				2	0.72
				3	0.95
				4	4.46
				5	3.807
	8	yes	6	1	5.327	3.0295
				2	3.535
				3	1.429
				4	2.676
				5	2.785
				6	2.425
6	1	yes	9	1	4.19	2.81844
				2	4.949
				3	1.117
				4	2.619
				5	4.78
				6	2.61
				7	1.976
				8	2.107
				9	1.018
	2	yes	8	1	1.251	2.192
				2	2.045
				3	2.424
				4	2.932
				5	3.509
				6	2.383
				7	1.059
				8	1.933
	3	yes	7	1	2.709	1.66671
				2	0.885
				3	0.678
				4	4.108
				5	0.958
				6	1.239
				7	1.09
	4	yes	9	1	4.902	3.26056
				2	4.798
				3	1.983
				4	1.474
				5	8.669
				6	2.083
				7	1.402
				8	1.898
				9	2.136
	5	yes	10	1	6.535	2.5394
				2	4.889
				3	1.48
				4	0.806
				5	4.75
				6	2.826
				7	1.708
				8	1.243
				9	0.71
				10	0.447
	6	yes	11	1	2.22	2.73591
				2	4.224
				3	5.54
				4	1.636
				5	4.631
				6	1.752
				7	1.217
				8	1.746
				9	1.616
				10	3.41
				11	2.103
	7	yes	7	1	7.31	3.09614
				2	5.122
				3	4.114
				4	2.056
				5	0.606
				6	1.471
				7	0.994
	8	yes	8	1	4.379	2.81225
				2	4.688
				3	1.59
				4	4.094
				5	4.949
				6	0.599
				7	0.809
				8	1.39
	9	yes	6	1	5.252	3.67733
				2	1.402
				3	4.361
				4	9.487
				5	0.98
				6	0.582
	10	yes	10	1	0.759	1.6873
				2	1.229
				3	1.09
				4	8.288
				5	0.717
				6	1.115
				7	0.958
				8	0.815
				9	0.89
				10	1.012
7	1	yes	7	1	5.411	3.20971
				2	1.678
				3	1.424
				4	8.054
				5	3.357
				6	1.306
				7	1.238
	2	yes	10	1	5.207	2.1058
				2	1.217
				3	0.941
				4	2.972
				5	1.468
				6	1.689
				7	0.652
				8	4.662
				9	1.457
				10	0.793
	3	yes	9	1	1.738	2.48444
				2	1.415
				3	4.985
				4	2.402
				5	1.389
				6	6.015
				7	2.069
				8	0.886
				9	1.461
	4	yes	7	1	2.215	2.83814
				2	1.189
				3	1.363
				4	10.024
				5	2.376
				6	1.478
				7	1.222
	5	yes	3	1	7.154	5.02567
				2	4.005
				3	3.918
	6	yes	5	1	8.294	3.371
				2	1.522
				3	1.519
				4	2.998
				5	2.522
8	1	yes	3	1	0.849	3.53533
				2	8.485
				3	1.272
	2	yes	7	1	8.181	2.82357
				2	1.335
				3	1.84
				4	1.522
				5	2.066
				6	3.165
				7	1.656
	3	yes	5	1	5.253	2.5588
				2	1.812
				3	0.989
				4	0.861
				5	3.879
	4	yes	7	1	0.941	2.34814
				2	9.036
				3	0.793
				4	0.882
				5	2.069
				6	1.522
				7	1.194
	5	no	8	1	4.498	3.353
				2	5.003
				3	1.329
				4	3.966
				5	2.282
				6	1.519
				7	3.997
				8	4.23
	6	yes	8	1	5.35	4.4685
				2	5.557
				3	5.661
				4	5.19
				5	3.086
				6	1.882
				7	3.423
				8	5.599
	7	no	5	1	10.13	4.0424
				2	1.253
				3	4.806
				4	1.49
				5	2.533
	8	yes	9	1	2.37	2.225
				2	2.586
				3	1.305
				4	1.977
				5	2.37
				6	4.408
				7	2.67
				8	1.291
				9	1.048
	9	yes	9	1	6.977	2.33011
				2	1.567
				3	1.303
				4	1.282
				5	4.269
				6	1.774
				7	0.856
				8	0.712
				9	2.231
	10	yes	10	1	1.305	2.7914
				2	4.829
				3	2.472
				4	1.929
				5	3.886
				6	2.659
				7	2.104
				8	1.65
				9	3.215
				10	3.865
	11	no	8	1	4.483	2.66375
				2	2.001
				3	1.801
				4	1.524
				5	3.228
				6	3.142
				7	3.223
				8	1.908
	12	yes	9	1	3.902	2.84989
				2	4.615
				3	4.498
				4	3.671
				5	3.861
				6	1.369
				7	1.256
				8	1.155
				9	1.322
9	1	no	2	1	4.563	4.2105
				2	3.858
	2	no	4	1	4.426	3.2805
				2	3.35
				3	3.884
				4	1.462
	3	yes	3	1	1.354	1.44367
				2	1.418
				3	1.559
	4	yes	3	1	4.09	2.68567
				2	2.517
				3	1.45
	5	yes	1	1	5.242	5.242
	6	no	0
	7	no	4	1	4.329	3.10825
				2	2.612
				3	1.117
				4	4.375
	8	yes	5	1	2.848	2.6366
				2	3.398
				3	1.429
				4	1.04
				5	4.468
	9	yes	4	1	4.398	3.5135
				2	2.969
				3	2.953
				4	3.734
	10	no	10	1	3.393	2.5842
				2	0.891
				3	0.997
				4	4.66
				5	3.913
				6	2.273
				7	1.644
				8	2.66
				9	1.867
				10	3.544
	11	yes	4	1	1.766	2.4845
				2	2.808
				3	3.094
				4	2.27
	12	yes	7	1	1.845	2.66357
				2	1.466
				3	3.728
				4	4.539
				5	2.462
				6	1.451
				7	3.154
	13	no	9	1	3.672	3.01844
				2	4.398
				3	1.895
				4	1.664
				5	3.96
				6	4.424
				7	1.198
				8	1.665
				9	4.29
	14	yes	5	1	3.166	1.9362
				2	1.422
				3	1.016
				4	2.622
				5	1.455
	15	yes	4	1	5.716	5.27475
				2	2.147
				3	5.841
				4	7.395
	16	yes	4	1	1.477	2.59525
				2	3.49
				3	4.066
				4	1.348
10	1	yes	5	1	4.974	2.4196
				2	2.684
				3	1.576
				4	1.534
				5	1.33
	2	yes	14	1	5.556	1.91329
				2	3.383
				3	2.742
				4	1.87
				5	3.501
				6	1.749
				7	1.28
				8	0.698
				9	1.079
				10	1.003
				11	0.762
				12	1.104
				13	1.041
				14	1.018
	3	yes	7	1	4.791	2.649
				2	3.375
				3	2.166
				4	2.459
				5	3.487
				6	1.162
				7	1.103
	4	yes	7	1	2.99	2.70314
				2	2.831
				3	4.86
				4	1.559
				5	1.267
				6	4.191
				7	1.224
	5	yes	8	1	2.51	2.38362
				2	1.212
				3	4.507
				4	2.995
				5	2.731
				6	1.267
				7	3.276
				8	0.571
	6	yes	7	1	3.19	1.97829
				2	2.058
				3	3.584
				4	1.199
				5	1.217
				6	0.964
				7	1.636
	7	no	10	1	5.114	2.1619
				2	4.519
				3	2.245
				4	1.515
				5	1.073
				6	0.96
				7	3.308
				8	0.738
				9	0.624
				10	1.523
	8	yes	8	1	5.056	2.72337
				2	3.949
				3	4.213
				4	3.276
				5	2.353
				6	0.937
				7	0.946
				8	1.057
	9	yes	9	1	0.857	2.08778
				2	3.956
				3	3.749
				4	3.743
				5	1.725
				6	1.05
				7	0.892
				8	1.679
				9	1.139
	10	yes	6	1	3.782	2.49233
				2	1.364
				3	1.242
				4	2.273
				5	1.828
				6	4.465
11	1	yes	10	1	3.733	2.7035
				2	3.24
				3	3.429
				4	3.19
				5	0.829
				6	2.253
				7	2.035
				8	1.892
				9	1.117
				10	5.317
	2	no	9	1	2.136	2.05322
				2	3.267
				3	0.792
				4	1.824
				5	1.78
				6	3.012
				7	1.649
				8	2.411
				9	1.608
	3	no	6	1	3.884	2.33733
				2	4.083
				3	3.269
				4	0.822
				5	1.057
				6	0.909
	4	no	1	1	1.88	1.88
	5	yes	8	1	3.346	2.16938
				2	4.017
				3	1.516
				4	1.327
				5	1.244
				6	3.715
				7	1.04
				8	1.15
	6	no	8	1	3.613	2.50762
				2	1.162
				3	5.74
				4	2.553
				5	1.466
				6	1.587
				7	2.523
				8	1.417
	7	no	8	1	5.473	2.757
				2	4.409
				3	3.718
				4	2.007
				5	2.19
				6	1.941
				7	1.088
				8	1.23
	8	no	9	1	4.023	2.47567
				2	0.931
				3	1.525
				4	1.97
				5	4.261
				6	5.367
				7	1.819
				8	1.073
				9	1.312
	9	no	1	1	2.94	2.94
	10	no	6	1	2.94	2.42633
				2	1.409
				3	2.963
				4	0.78
				5	1.514
				6	4.952
	11	no	8	1	1.041	1.95938
				2	1.003
				3	0.997
				4	4.395
				5	2.837
				6	2.204
				7	2.204
				8	0.994
	12	no	10	1	2.975	2.2496
				2	1.853
				3	4.246
				4	3.162
				5	1.05
				6	1.705
				7	1.233
				8	1.364
				9	1.438
				10	3.47
	13	no	5	1	3.104	2.281
				2	1.678
				3	1.384
				4	0.937
				5	4.302
	14	no	9	1	3.501	2.47744
				2	1.251
				3	1.854
				4	2.819
				5	3.698
				6	1.238
				7	1.084
				8	3.748
				9	3.104
	15	no	8	1	5.174	2.50925
				2	1.204
				3	1.162
				4	1.581
				5	3.816
				6	2.554
				7	3.058
				8	1.525
