# Supplementary material for: A role for the centrosome in regulating the rate of neuronal efferocytosis by microglia in vivo
Source: eLife. 2022 Nov 18;11:e82094. doi: 10.7554/eLife.82094 (PMC9674339; doi:10.7554/eLife.82094)
Supplement: Figure 6—source data 1. [file elife-82094-fig6-data1.xlsx]

## Sheet: km163_Fish2
Experiment	Phagosome	Phagosome Appearance (Tp)	Lamp1 appearance on phagosome (Tp)	dT	dT (min)		Experiment	Phagosome	Rab5a appearance on phagosome (sec)	Rab5a appearance on phagosome (min)
Km163-Fish1-Cell2	1	167	201	34	8.5		km102-Fish1-Cell1	1	90	1.5
	2	185	229	44	11			2	75	1.25
	3	211	251	40	10			3	75	1.25
	4	223	294	71	17.75			4	330	5.5
	5	228	284	56	14			5	60	1
	6	246	277	31	7.75			6	435	7.25
	7	274	327	53	13.25			7	195	3.25
	8	282	350	68	17			8	540	9
	9	299	350	51	12.75
	10	354	398	44	11		km109-Fish1-Cell1	1	180	3
								2	285	4.75
Km163-Fish1-Cell1	1	100	127	27	6.75			3	60	1
	2	107	136	29	7.25			4	210	3.5
	3	138	179	41	10.25			5	270	4.5
	4	179	245	66	16.5			6	270	4.5
	5	215	246	31	7.75			7	90	1.5
	6	255	283	28	7			8	135	2.25
	7	306	342	36	9
	8	308	346	38	9.5		km161-Fish1-Cell1	1	180	3
	9	396	437	41	10.25			2	360	6
	10	465						3	520	8.66667
								5	400	6.66667
Km163-Fish1-Cell3	1	30	75	45	11.25			6	420	7
	2	83	115	32	8			7	260	4.33333
	3	113	137	24	6			10	260	4.33333
	4	141	173	32	8			12	340	5.66667
	5	175	215	40	10
	6	187	218	31	7.75		km161-Fish1-Cell4	1	160	2.66667
	7	256	286	30	7.5			2	360	6
	8	276	311	35	8.75			3	320	5.33333
	9	320	344	24	6			4	340	5.66667
	10	360	433	73	18.25			5	220	3.66667
	11	367	393	26	6.5			6	400	6.66667
								7	620	10.3333
								8	220	3.66667
								9	120	2
								10	320	5.33333
								11	480	8
Statistics from Graphpad Prism 9								12	440	7.33333
Descriptive statistics
	Rab5a	Lamp1
Total number of values	36	30
Number of excluded values	0	0
Number of binned values	36	30
Minimum	1	6
25% Percentile	2.7525	7.6875
Median	4.5	9.25
75% Percentile	6.5025	11.625
Maximum	10.33	18.25
Mean	4.64833	10.175
Std. Deviation	2.45408	3.5338
Std. Error of Mean	0.409013	0.64518
Lower 95% CI of mean	3.81799	8.85546
Upper 95% CI of mean	5.47867	11.4945
