# Supplementary material for: A role for the centrosome in regulating the rate of neuronal efferocytosis by microglia in vivo
Source: eLife. 2022 Nov 18;11:e82094. doi: 10.7554/eLife.82094 (PMC9674339; doi:10.7554/eLife.82094)
Supplement: Figure 7—source data 1. [file elife-82094-fig7-data1.xlsx]

## Sheet: AK008
Experiment	Fish	Cell	# centrosomes	Time (h)	# events	Rate		Statistics from Graphpad Prism 9
AK008	Fish1	Cell3	1	1.75	12	6.85714
		Cell4	1	1	7	7		Column B	2 centrosome
		Cell6	1	2	8	4		vs.	vs,
		Cell1	2	2	13	6.5		Column A	1 centrosomes
		Cell2	2	2	17	8.5
		Cell5	2	2	14	7		Mann Whitney test
								P value	<0,0001
AK008	Fish3	Cell1	1	0.875	4	4.57143		Exact or approximate P value?	Exact
		Cell2	1	1.33333	4	3		P value summary	****
		Cell3	1	2	10	5		Significantly different (P < 0.05)?	Yes
		Cell4	1	2	12	6		One- or two-tailed P value?	Two-tailed
		Cell5	2	2	16	8		Sum of ranks in column A,B	538 , 1173
		Cell6	2	2	21	10.5		Mann-Whitney U	160
km137	Fish1	Cell1	2	1	10	10		Difference between medians
		Cell2	2	1	9	9		Median of column A	6,000, n=27
								Median of column B	7,500, n=31
km215	Fish 5	Cell3	1	2	13	6.5		Difference: Actual	1.5
		Cell6	1	2	13	6.5		Difference: Hodges-Lehmann	2
		Cell7	1	2	13	6.5
		Cell9	1	2	12	6		How big is the difference?
		Cell1	2	2	19	9.5		Mean of column A	5.722
		Cell2	2	2	14	7		Mean of column B	7.777
		Cell4	2	2	18	9		Difference between means (B - A) ± SEM	2,055 ± 0,4381
		Cell5	2	2	16	8		95% confidence interval	1,177 to 2,933
		Cell8	2	2	14	7		R squared (eta squared)	0.2879
km218	Fish 1	Cell1	1	1.44444	6	4.15385		F test to compare variances
		Cell10	1	2	12	6		F, DFn, Dfd	1,874, 30, 26
		Cell5	1	2	17	8.5		P value	0.1077
		Cell2	2	2	14	7		P value summary	ns
		Cell3	2	2	13	6.5		Significantly different (P < 0.05)?	No
		Cell4	2	2	16	8
		Cell7	2	2	16	8
		Cell9	2	2	10	5
km218	Fish 4	Cell1	1	2	7	3.5
		Cell4	1	2	14	7
		Cell5	1	2	11	5.5
		Cell7	1	1.33	10	7.5188
		Cell2	2	2	17	8.5
		Cell3	2	2	15	7.5
		Cell6	2	1.72222	11	6.3871
		Cell8	2	2	16	8
		Cell9	2	1.72222	18	10.4516
km227	Fish5	Cell1	1	2	9	4.5
		Cell2	1	2	9	4.5
		Cell5	1	2	7	3.5
		Cell6	1	2	9	4.5
		Cell7	1	2	12	6
		Cell3	2	2	11	5.5
		Cell4	2	2	11	5.5
		Cell8	2	1	6	6
km227	Fish4	Cell2	1	2	12	6
		Cell3	1	2	16	8
		Cell5	1	2	11	5.5
		Cell9	1	2	12	6
		Cell1	2	2	14	7
		Cell10	2	2	13	6.5
		Cell4	2	2	21	10.5
		Cell6	2	2	11	5.5
		Cell7	2	2	15	7.5

## Sheet: km137
Experiment	Fish	Cell	# centrosomes	Time (h)	# events

## Sheet: Km215
Experiment	Fish	Cell	# centrosomes	Time (h)	# events	Rate
km215	Fish 5	Cell3	1	2	13	6.5
		Cell6	1	2	13	6.5
		Cell7	1	2	13	6.5
		Cell9	1	2	12	6
		Cell1	2	2	19	9.5
		Cell2	2	2	14	7
		Cell4	2	2	18	9
		Cell5	2	2	16	8
		Cell8	2	2	14	7

## Sheet: km218
Experiment	Fish	Cell	# centrosomes	Time (h)	# events	Rate
km218	Fish 1	Cell1	1	1.44444	6	4.15385
		Cell10	1	2	12	6
		Cell5	1	2	17	8.5
		Cell2	2	2	14	7
		Cell3	2	2	13	6.5
		Cell4	2	2	16	8
		Cell7	2	2	16	8
		Cell9	2	2	10	5
	Fish 4	Cell1	1	2	7	3.5
		Cell4	1	2	14	7
		Cell5	1	2	11	5.5
		Cell7	1	1.33	10	7.5188
		Cell2	2	2	17	8.5
		Cell3	2	2	15	7.5
		Cell6	2	1.72222	11	6.3871
		Cell8	2	2	16	8
		Cell9	2	1.72222	18	10.4516

## Sheet: km227
Experiment	Fish	Cell	# centrosomes	Time (h)	# events	Rate
km227	Fish5	Cell1	1	2	9	4.5
		Cell2	1	2	9	4.5
		Cell5	1	2	7	3.5
		Cell6	1	2	9	4.5
		Cell7	1	2	12	6
		Cell3	2	2	11	5.5
		Cell4	2	2	11	5.5
		Cell8	2	1	6	6
	Fish4	Cell2	1	2	12	6
		Cell3	1	2	16	8
		Cell5	1	2	11	5.5
		Cell9	1	2	12	6
		Cell1	2	2	14	7
		Cell10	2	2	13	6.5
		Cell4	2	2	21	10.5
		Cell6	2	2	11	5.5
		Cell7	2	2	15	7.5
