# Supplementary material for: A role for the centrosome in regulating the rate of neuronal efferocytosis by microglia in vivo
Source: eLife. 2022 Nov 18;11:e82094. doi: 10.7554/eLife.82094 (PMC9674339; doi:10.7554/eLife.82094)
Supplement: Figure 8—figure supplement 1—source data 1. [file elife-82094-fig8-figsupp1-data1.xlsx]

## Sheet: DMSO
Experiment	Treatment	Measures	Area	Radius
AK037-F1	DMSO	1	65.714	4.57356		Statistics from Graphpad Prism 9
	DMSO	2	94.662	5.48925		Column statistics
	DMSO	3	95.291	5.50746			DMSO	PLC	PMA
	DMSO	4	94.635	5.48847		Number of values	50	39	39
	DMSO	5	109.314	5.89879
	DMSO	6	122.025	6.23232		Minimum	3.589	4.317	4.11
	DMSO	7	101.36	5.68013		25% Percentile	5.064	5.128	5.307
	DMSO	8	134.517	6.54355		Median	5.545	5.599	5.596
	DMSO	9	133.779	6.52558		75% Percentile	5.972	5.913	5.885
	DMSO	10	65.086	4.55165		Maximum	7.406	6.739	7.161
	DMSO	11	112.048	5.9721
	DMSO	12	115.519	6.0639		Mean	5.51	5.518	5.595
	DMSO	13	98.298	5.59368		Std. Deviation	0.7709	0.5971	0.5244
	DMSO	14	119.729	6.1734		Std. Error of Mean	0.109	0.09561	0.08398
	DMSO	15	112.075	5.97282
	DMSO	16	117.542	6.11676		Lower 95% CI	5.291	5.324	5.425
	DMSO	17	172.322	7.4062		Upper 95% CI	5.729	5.711	5.765
	DMSO	18	84.521	5.18689
	DMSO	19	144.221	6.77547
	DMSO	20	91.984	5.41105
AK037-F2	DMSO	1	106.963	5.83501
	DMSO	2	97.505	5.57107
	DMSO	3	115.109	6.05313
	DMSO	4	86.079	5.23448
	DMSO	5	68.858	4.68169
	DMSO	6	88.594	5.3104
	DMSO	7	108.357	5.87291
	DMSO	8	111.61	5.96042
	DMSO	9	65.632	4.5707
	DMSO	10	109.15	5.89436
	DMSO	11	96.002	5.52796
	DMSO	12	85.696	5.22282
	DMSO	13	93.952	5.46862
	DMSO	14	73.669	4.84248
	DMSO	15	90.179	5.35769
	DMSO	16	63.336	4.49004
	DMSO	17	101.961	5.69695
	DMSO	18	97.177	5.56169
	DMSO	19	80.749	5.06983
	DMSO	20	80.011	5.04661
	DMSO	21	99.719	5.63396
	DMSO	22	124.567	6.2969
	DMSO	23	110.052	5.91867
	DMSO	24	158.709	7.10765
	DMSO	25	55.436	4.20069
	DMSO	26	60.931	4.40397
	DMSO	27	88.129	5.29645
	DMSO	28	65.332	4.56024
	DMSO	29	40.456	3.58853
	DMSO	30	51.637	4.0542
AK011-F1	U73122	1	121.052	6.20742
	U73122	2	118.027	6.12937
	U73122	3	109.834	5.9128
	U73122	4	60.996	4.40632
	U73122	5	73.624	4.841
	U73122	6	110.098	5.91991
	U73122	7	104.254	5.76065
	U73122	8	122.667	6.24869
	U73122	9	103.843	5.74928
	U73122	10	104.107	5.75659
	U73122	11	87.221	5.26909
	U73122	12	105.664	5.79947
	U73122	13	63.61	4.49974
	U73122	14	115.972	6.07577
	U73122	15	86.076	5.23439
Ak016-F2	U73122	1	107.153	5.84019
	U73122	2	68.759	4.67832
	U73122	3	105.351	5.79088
	U73122	4	98.469	5.59854
	U73122	5	81.566	5.09542
	U73122	6	105.378	5.79162
	U73122	7	71.763	4.77942
	U73122	8	73.047	4.82199
	U73122	9	58.546	4.31692
	U73122	10	94.646	5.48878
	U73122	11	82.604	5.12774
	U73122	12	89.513	5.33787
	U73122	13	98.278	5.59311
	U73122	14	85.226	5.20848
	U73122	15	87	5.26241
	U73122	16	97.268	5.56429
	U73122	17	109.201	5.89574
	U73122	18	86.591	5.25003
	U73122	19	67.749	4.64383
	U73122	20	114.198	6.02913
	U73122	21	102.921	5.7237
	U73122	22	119.305	6.16246
	U73122	23	138.447	6.63845
	U73122	24	142.652	6.73851
AK030-F2	PMA	1	94.608	5.48768
	PMA	2	98.77	5.60709
	PMA	3	98.222	5.59151
	PMA	4	120.514	6.19361
	PMA	5	98.395	5.59644
	PMA	6	90.288	5.36093
	PMA	7	91.238	5.38906
	PMA	8	92.434	5.42427
	PMA	9	83.88	5.16719
	PMA	10	98.597	5.60218
	PMA	11	108.806	5.88507
	PMA	12	110.995	5.94397
	PMA	13	122.184	6.23638
	PMA	14	53.064	4.10984
	PMA	15	83.347	5.15075
AK033-F1	PMA	1	112.82	5.99264
	PMA	2	102.306	5.70658
	PMA	3	161.08	7.16054
	PMA	4	98.609	5.60252
	PMA	5	103.659	5.74419
	PMA	6	98.462	5.59834
	PMA	7	105.601	5.79774
	PMA	8	128.01	6.38333
	PMA	9	95.89	5.52474
	PMA	10	90.639	5.37134
	PMA	11	77.62	4.97064
	PMA	12	81.411	5.09057
	PMA	13	121.205	6.21134
	PMA	14	106.043	5.80987
	PMA	15	86.594	5.25012
	PMA	16	86.648	5.25175
	PMA	17	94.832	5.49418
	PMA	18	85.282	5.21019
	PMA	19	98.395	5.59644
	PMA	20	66.342	4.59536
	PMA	21	91.952	5.4101
	PMA	22	112.03	5.97162
	PMA	23	88.47	5.30668
	PMA	24	129.121	6.41097
